# Supplementary material for: Oxidative Dearomative Cross-Dehydrogenative Coupling of Indoles with Diverse C-H Nucleophiles: Efficient Approach to 2,2-Disubstituted Indolin-3-ones
Source: MDPI journal article supplement (doi:10.3390/molecules25020419), 2020-01-20

# **Oxidative Dearomative Cross-Dehydrogenative Coupling of Indoles with Diverse C-H Nucleophiles: Efficient Approach to 2,2-Disubstituted Indolin-3-ones**

Xue Yan,<sup>1,2</sup> Ying-De Tang,<sup>1,2</sup> Cheng-Shi Jiang,<sup>2</sup> Xigong Liu<sup>2,3,\*</sup>, and Hua Zhang<sup>2,\*</sup>

<sup>1</sup> School of Chemistry and Chemical Engineering, University of Jinan, Jinan 250022, China

<sup>2</sup> School of Biological Science and Technology, University of Jinan, Jinan 250022, China

E-mail: bio\_zhangh@ujn.edu.cn

<sup>3</sup> School of Chemistry and Chemical Engineering, Shandong University, Jinan 250100, China

E-mail: 201990000024@sdu.edu.cn

**<sup>1</sup>H and <sup>13</sup>C NMR spectra of synthesized compounds**

# <sup>1</sup>H NMR spectrum of compound 3a in CDCl<sub>3</sub> (600 MHz)

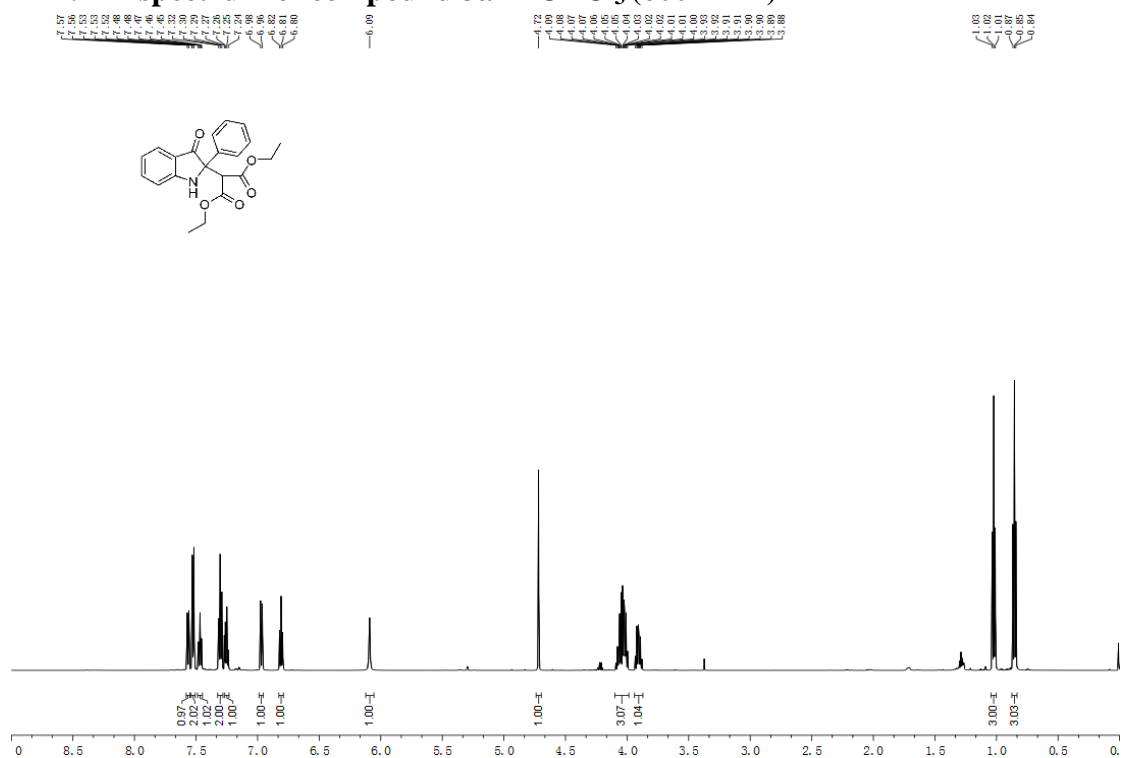

# <sup>13</sup>C NMR spectrum of compound 3a in CDCl<sub>3</sub> (151 MHz)

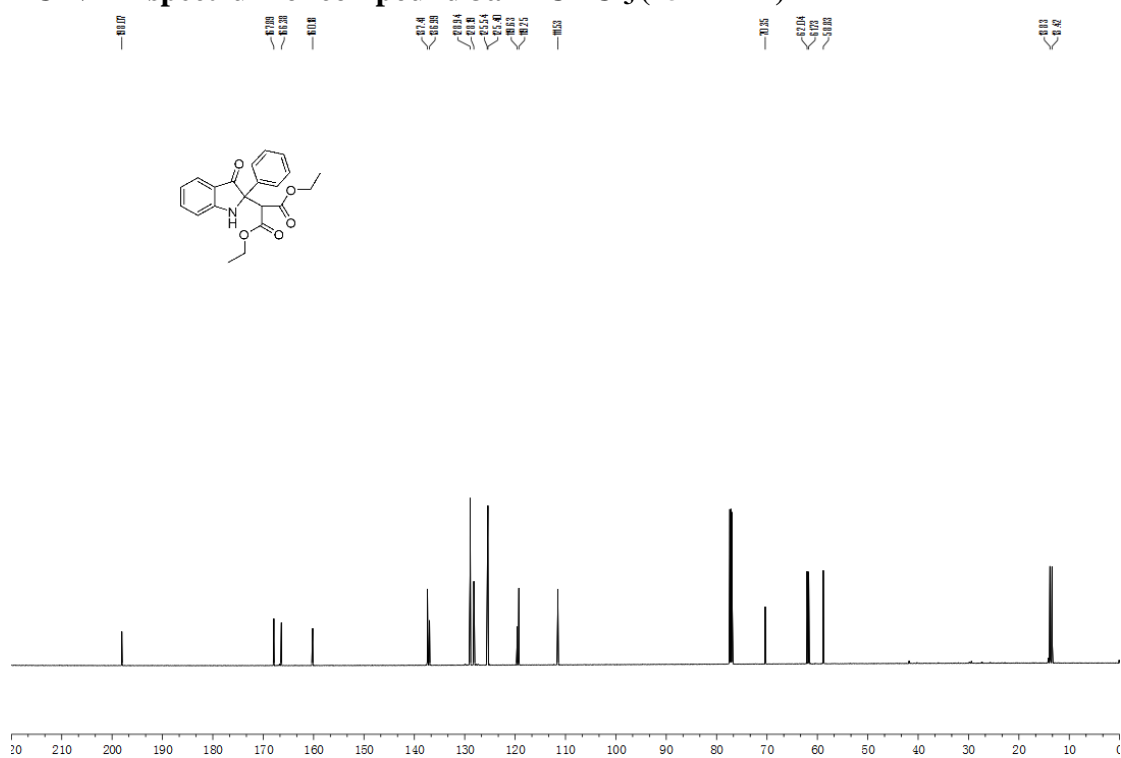

# <sup>1</sup>H NMR spectrum of compound 3b in CDCl<sub>3</sub> (600 MHz)

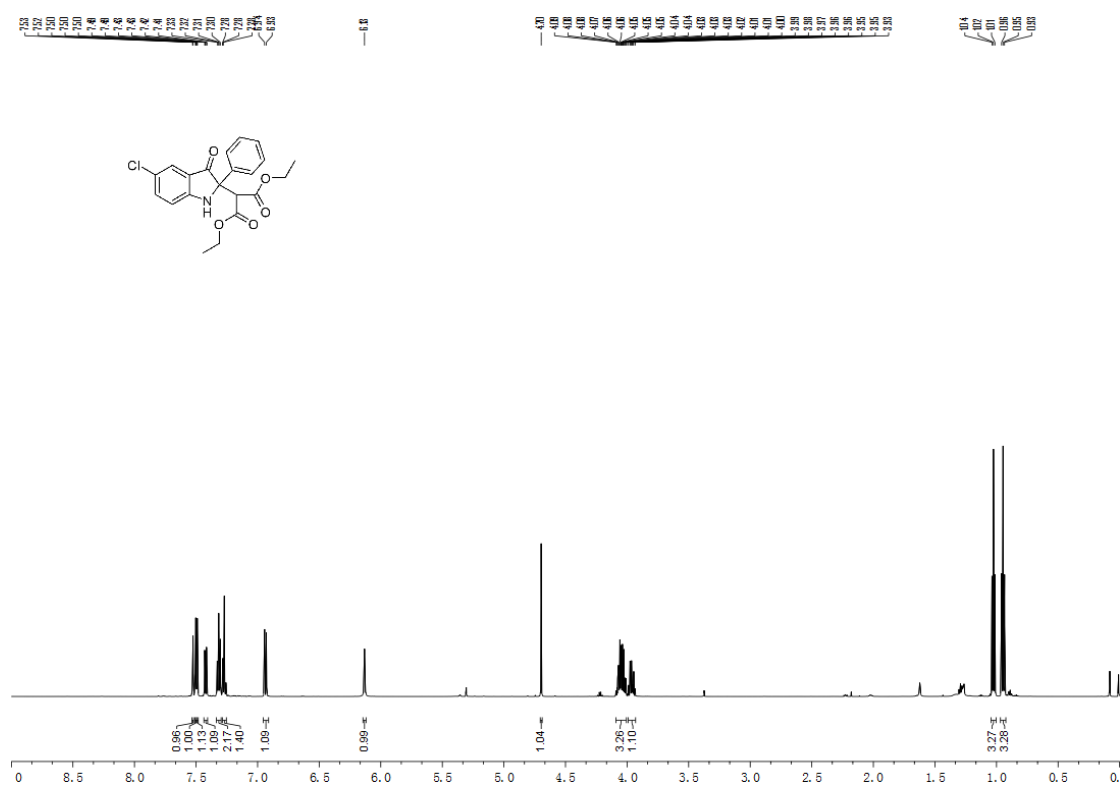

# <sup>13</sup>C NMR spectrum of compound 3b in CDCl<sub>3</sub> (151 MHz)

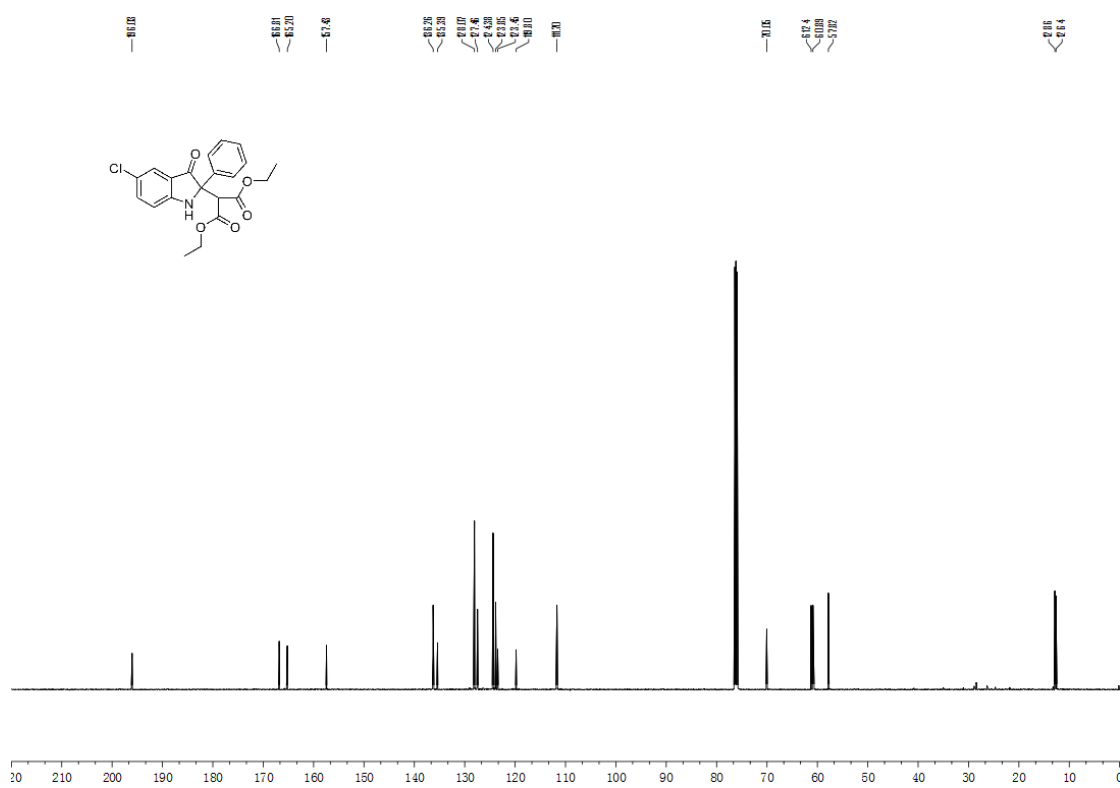

### $^1\text{H}$ NMR spectrum of compound 3c in $\text{CDCl}_3$ (600 MHz)

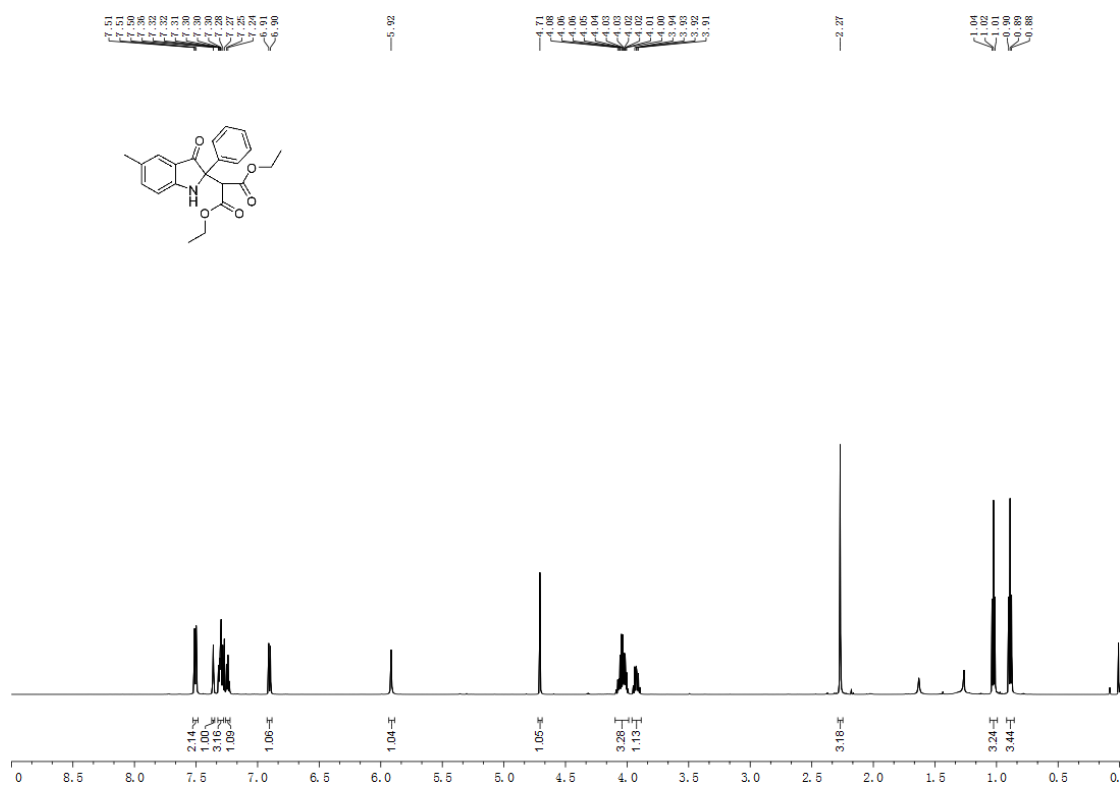

### $^{13}\text{C}$ NMR spectrum of compound 3c in $\text{CDCl}_3$ (151 MHz)

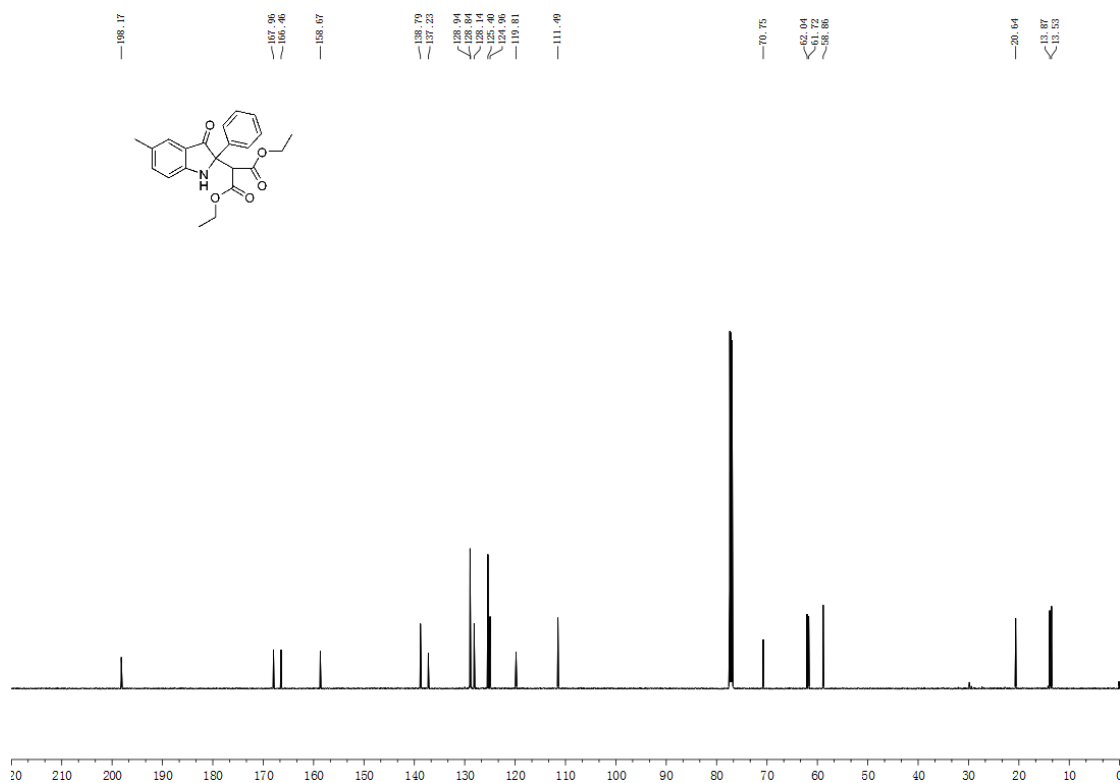

**<sup>1</sup>H NMR spectrum of compound 3d in CDCl<sub>3</sub> (600 MHz)**

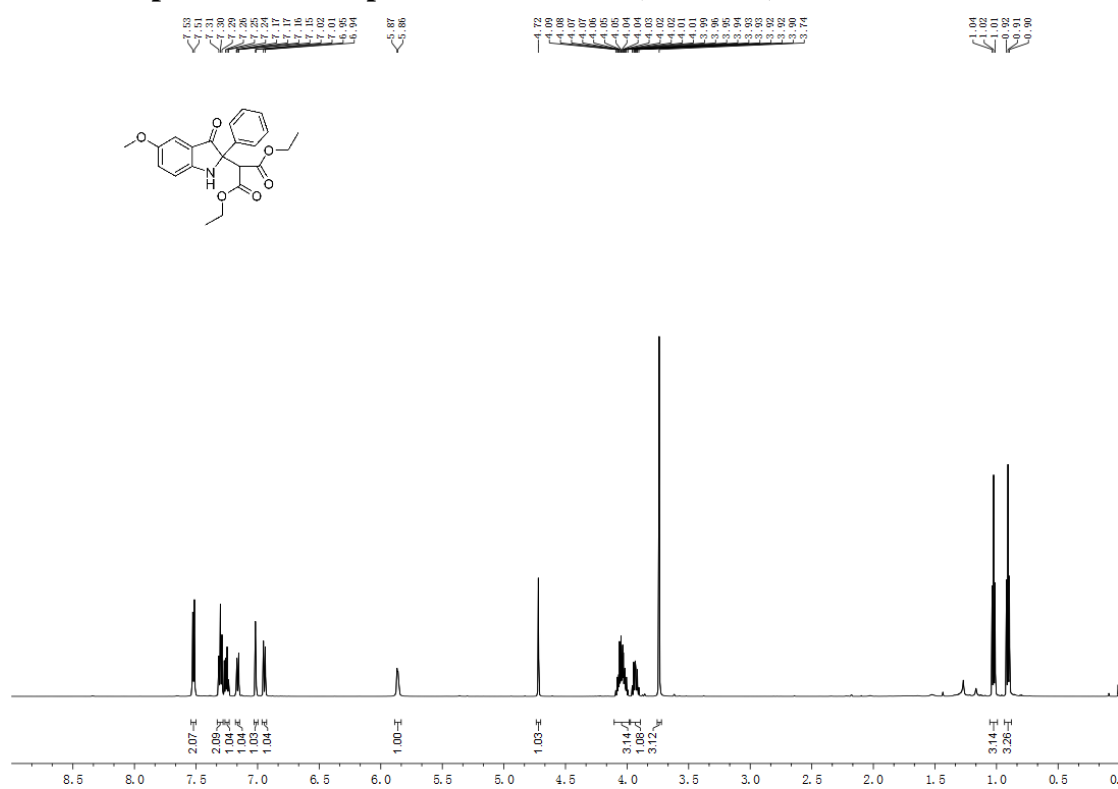

**<sup>13</sup>C NMR spectrum of compound 3d in CDCl<sub>3</sub> (151MHz)**

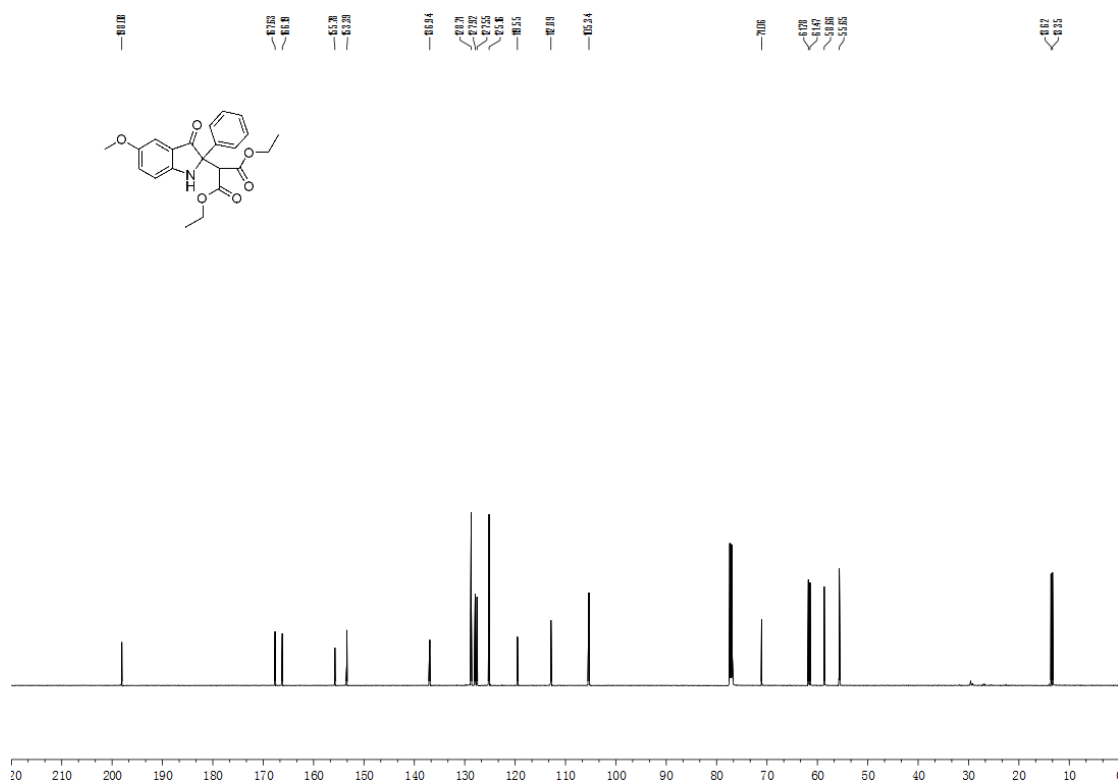

### <sup>1</sup>H NMR spectrum of compound 3e in CDCl<sub>3</sub> (600 MHz)

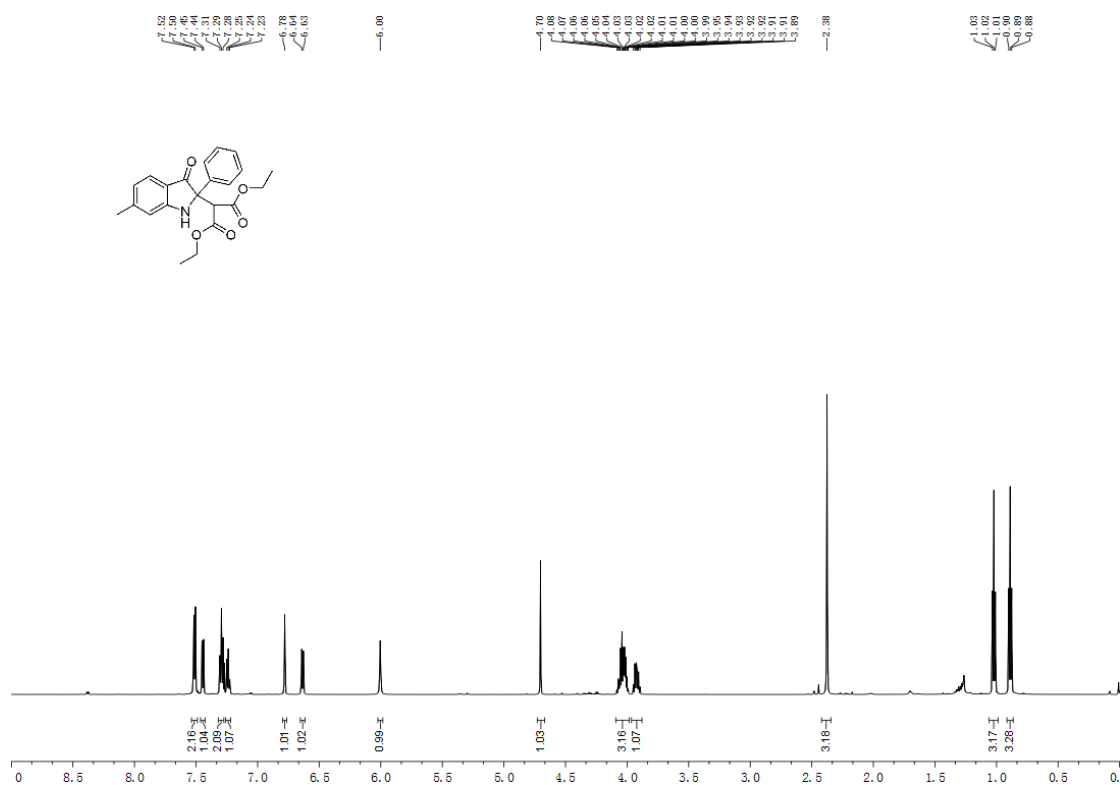

### <sup>13</sup>C NMR spectrum of compound 3e in CDCl<sub>3</sub> (151 MHz)

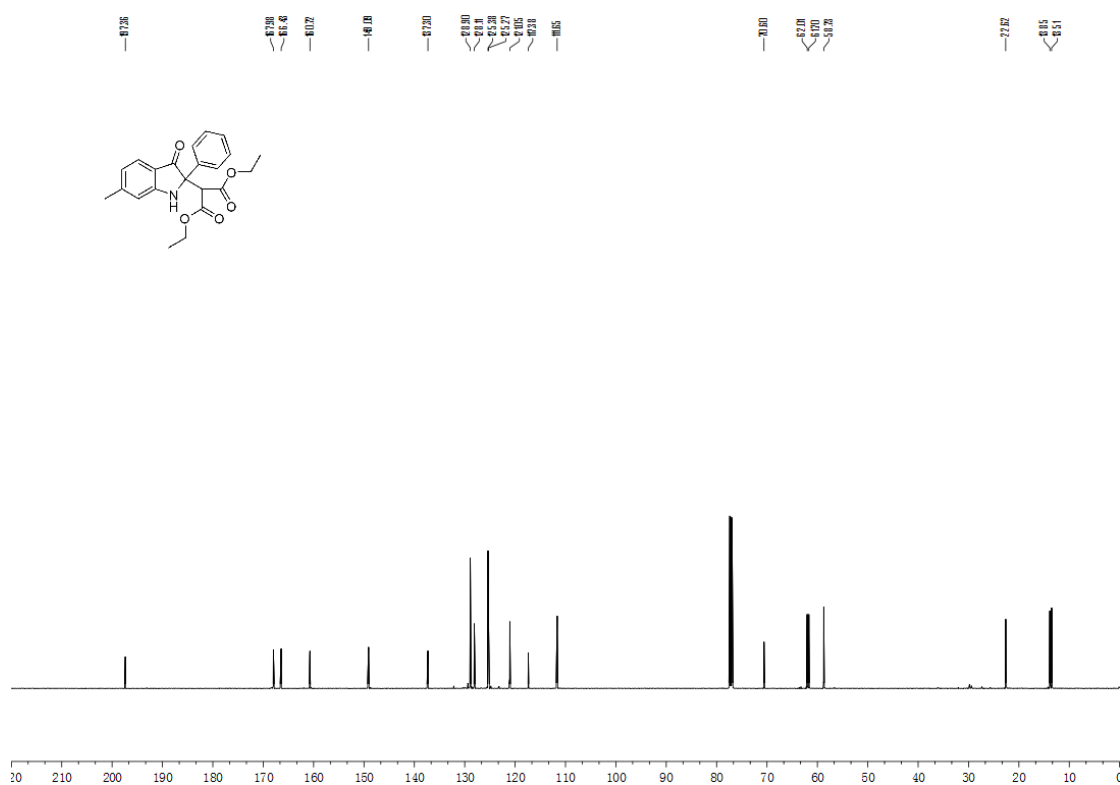

**$^1\text{H}$  NMR spectrum of compound 3f in  $\text{CDCl}_3$  (600 MHz)**

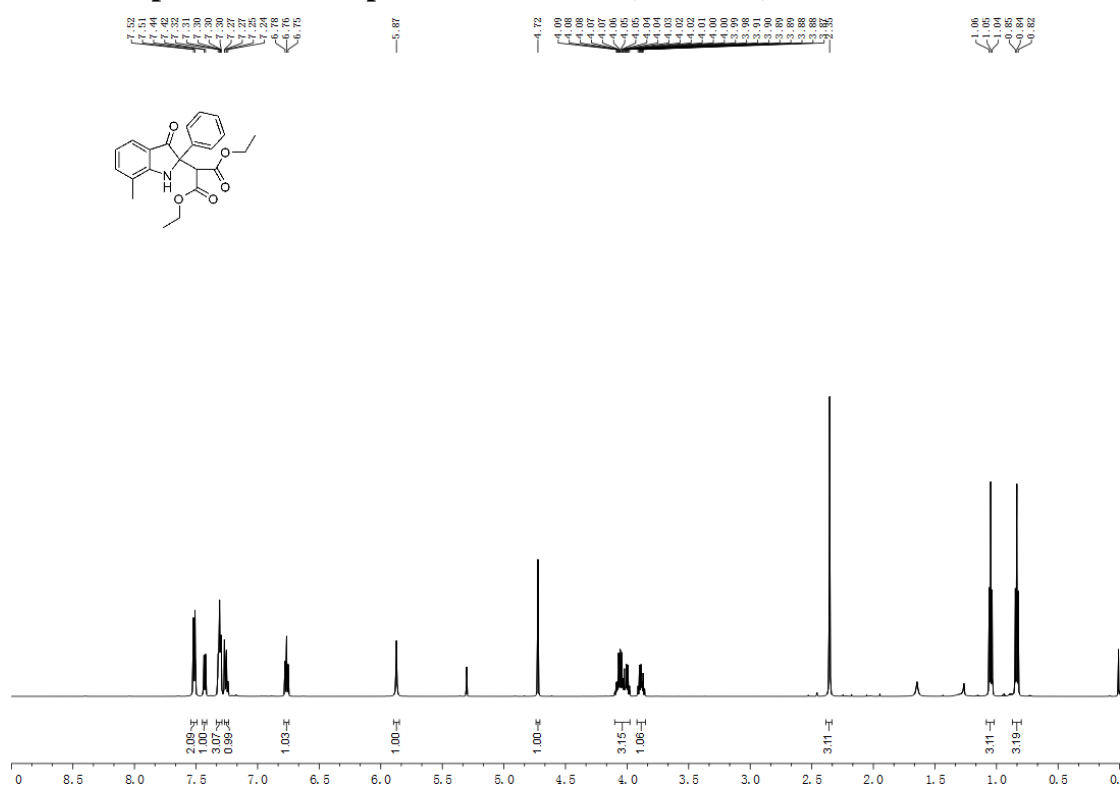

**$^{13}\text{C}$  NMR spectrum of compound 3f in  $\text{CDCl}_3$  (151 MHz)**

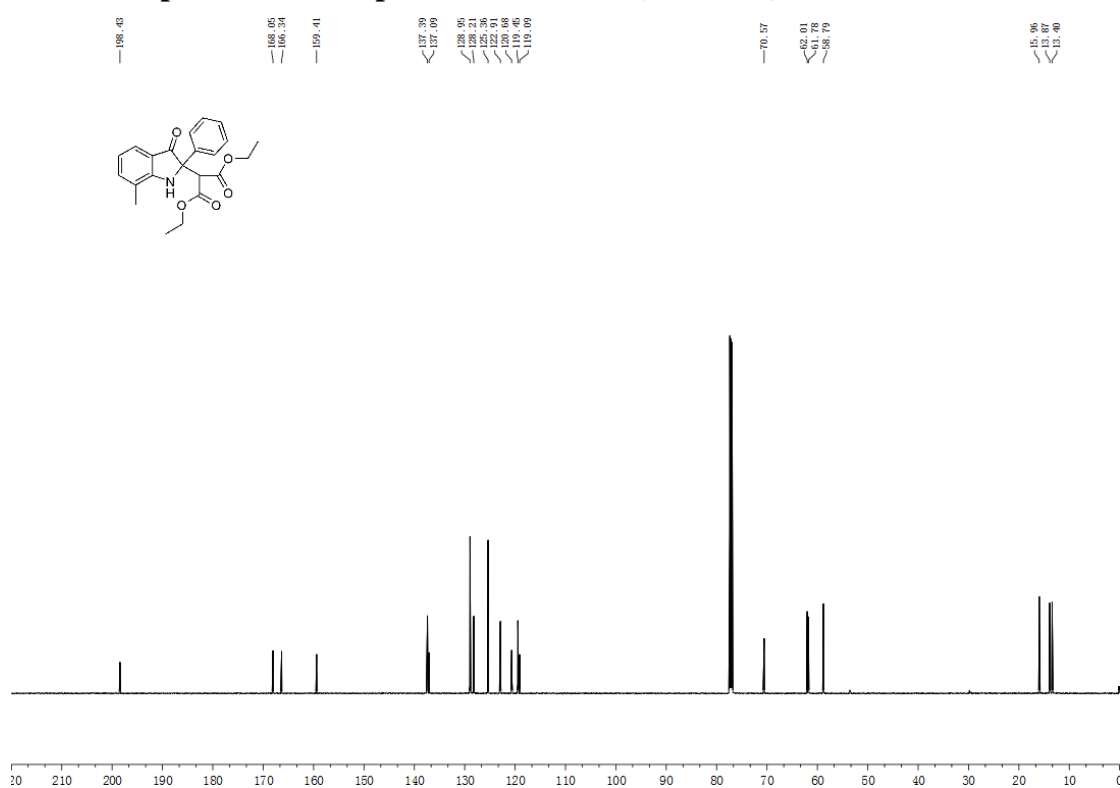

### $^1\text{H}$ NMR spectrum of compound 3g in $\text{CDCl}_3$ (600 MHz)

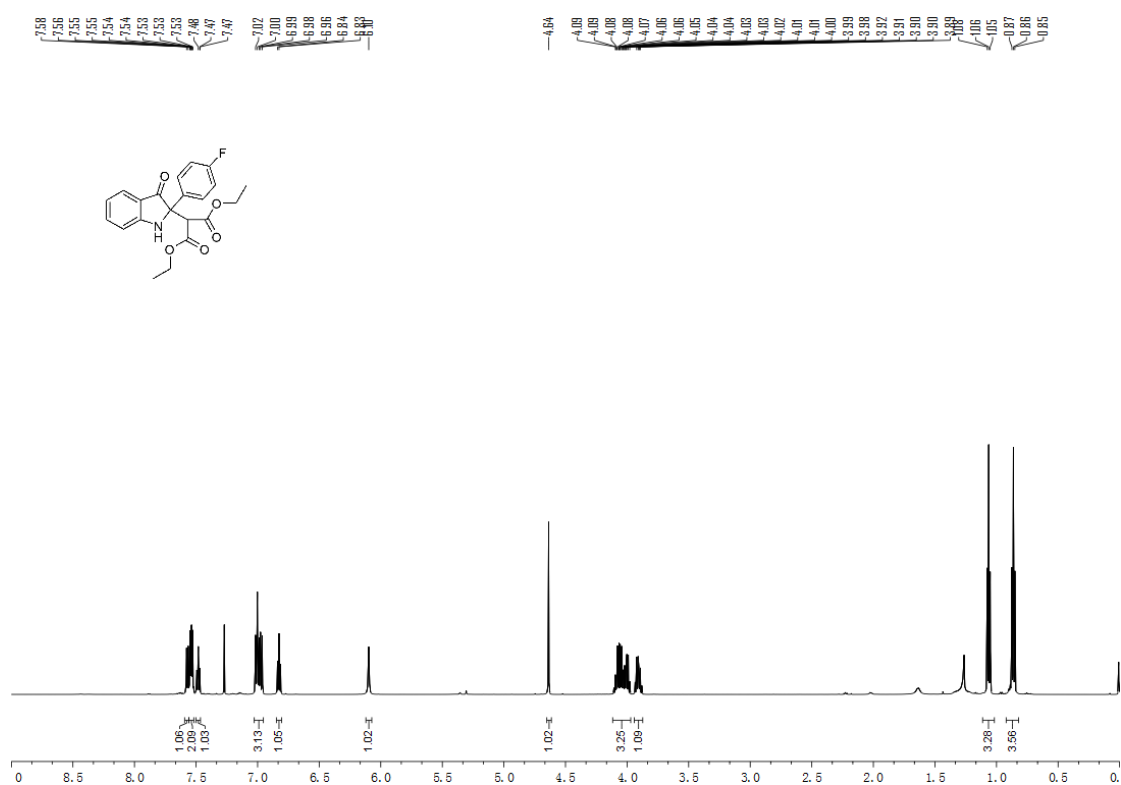

### $^{13}\text{C}$ NMR spectrum of compound 3g in $\text{CDCl}_3$ (151 MHz)

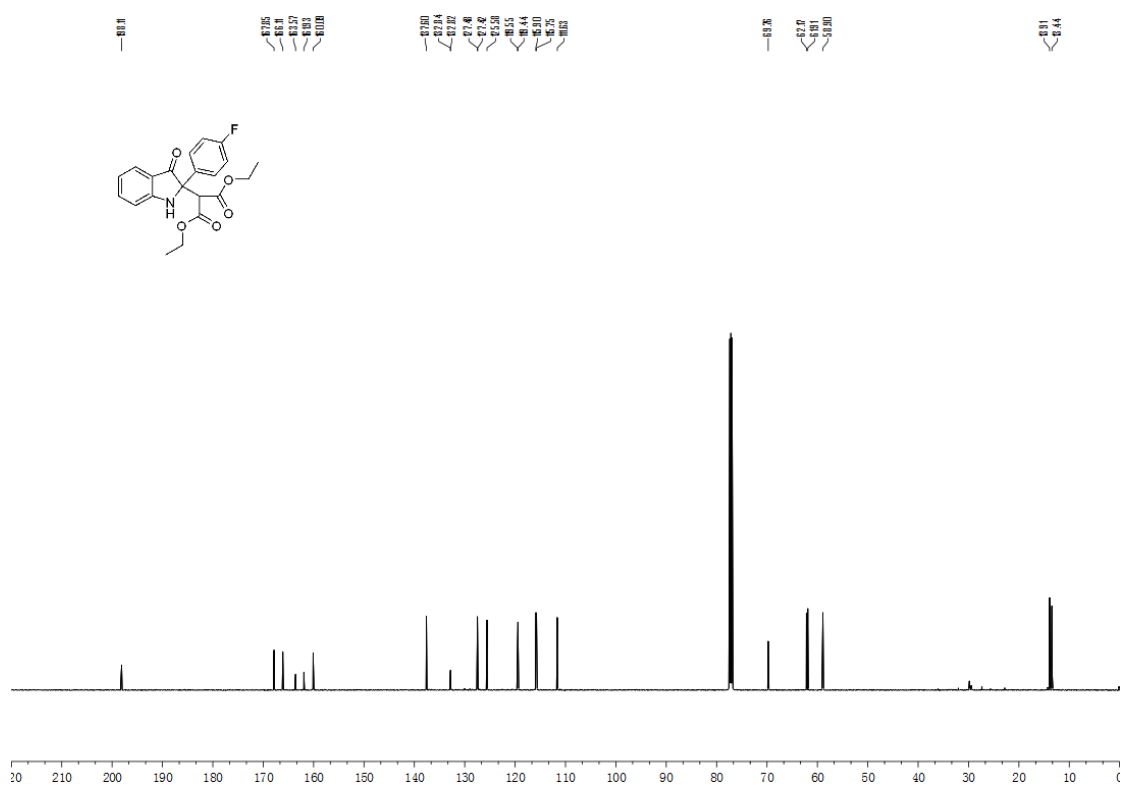



# <sup>1</sup>H NMR spectrum of compound 3h in CDCl<sub>3</sub> (600 MHz)

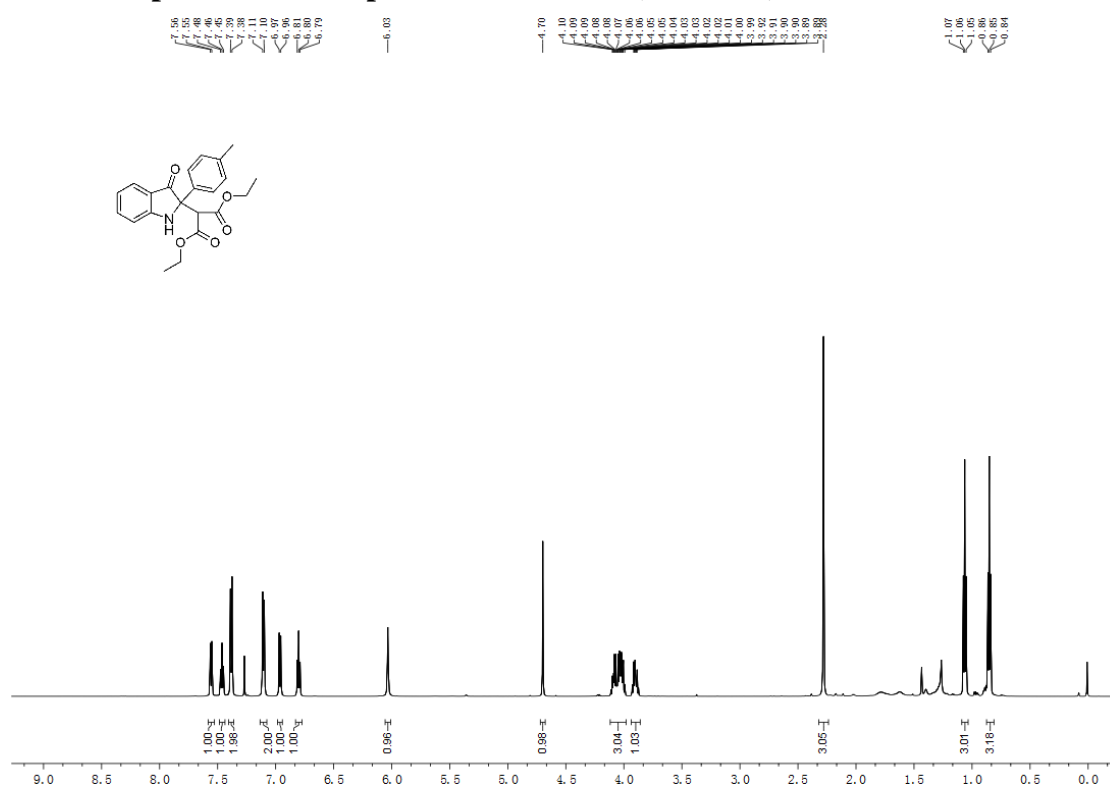

# <sup>13</sup>C NMR spectrum of compound 3h in CDCl<sub>3</sub> (151 MHz)

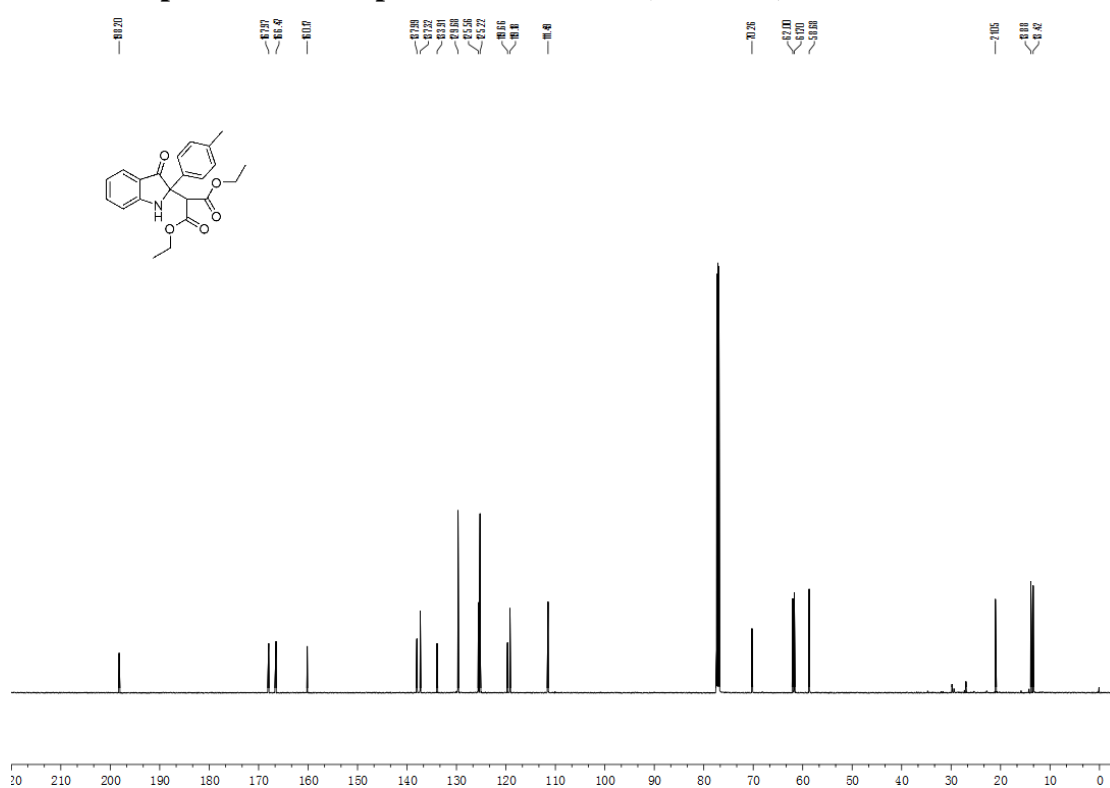



**<sup>1</sup>H NMR spectrum of compound 3j in CDCl<sub>3</sub> (600 MHz)**

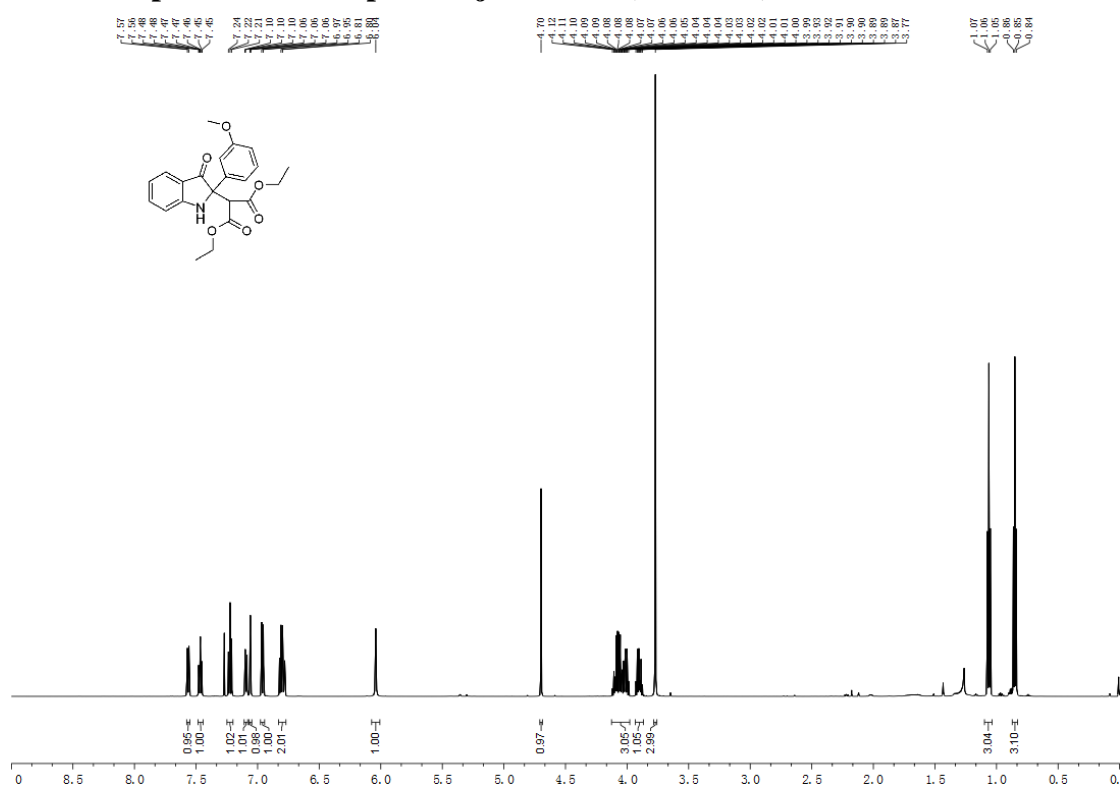

**<sup>13</sup>C NMR spectrum of compound 3j in CDCl<sub>3</sub> (151 MHz)**

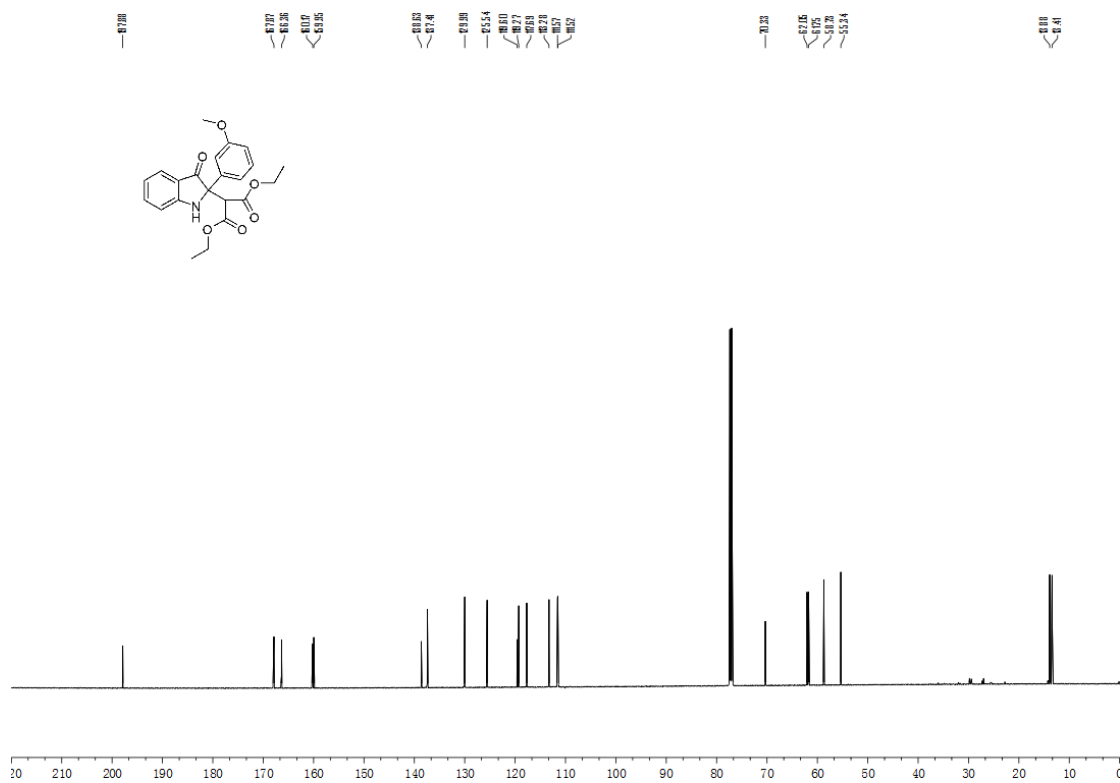

# <sup>1</sup>H NMR spectrum of compound 3k in CDCl<sub>3</sub> (600 MHz)

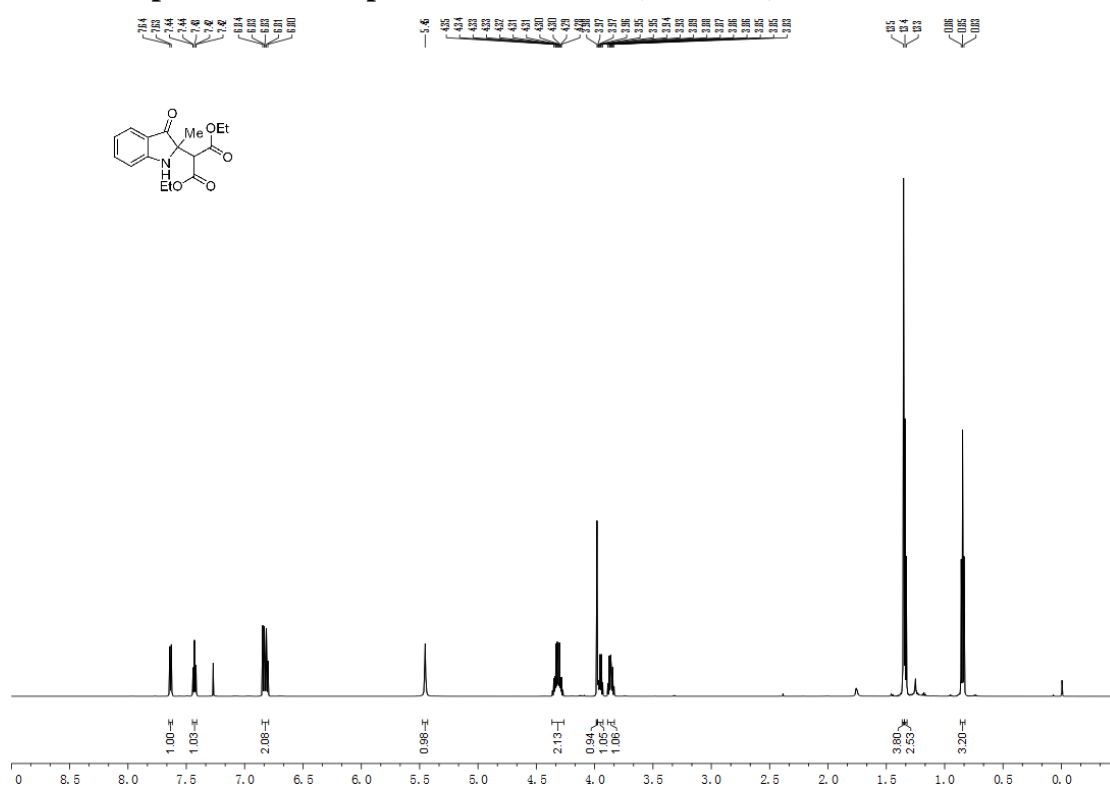

# <sup>13</sup>C NMR spectrum of compound 3k in CDCl<sub>3</sub> (151 MHz)

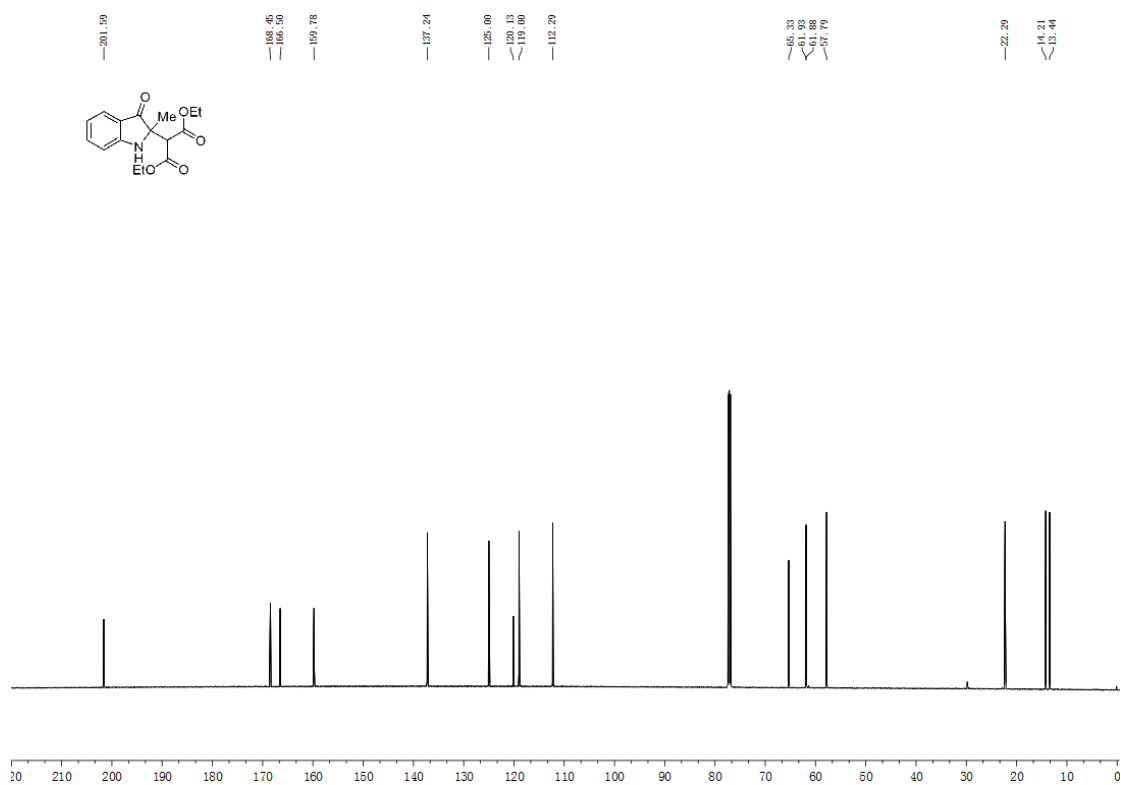

**<sup>1</sup>H NMR spectrum of compound 3l in CDCl<sub>3</sub> (600 MHz)**

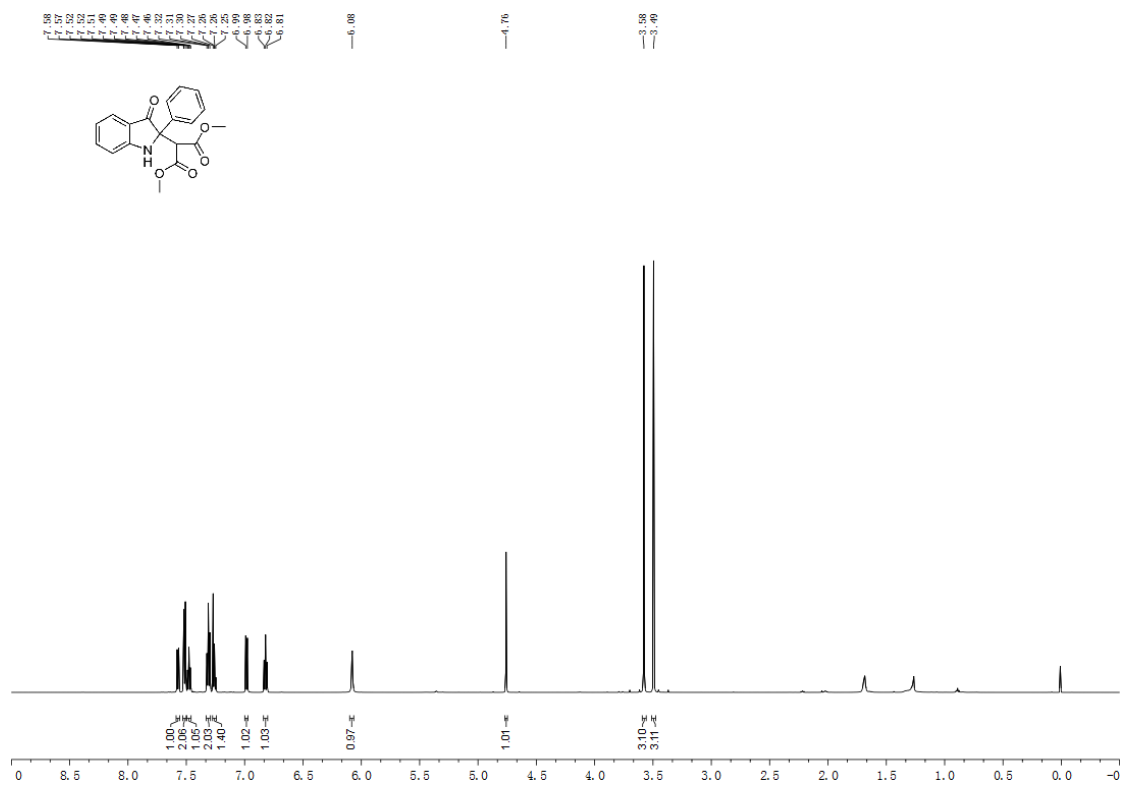

**<sup>13</sup>C NMR spectrum of compound 3l in CDCl<sub>3</sub> (151 MHz)**

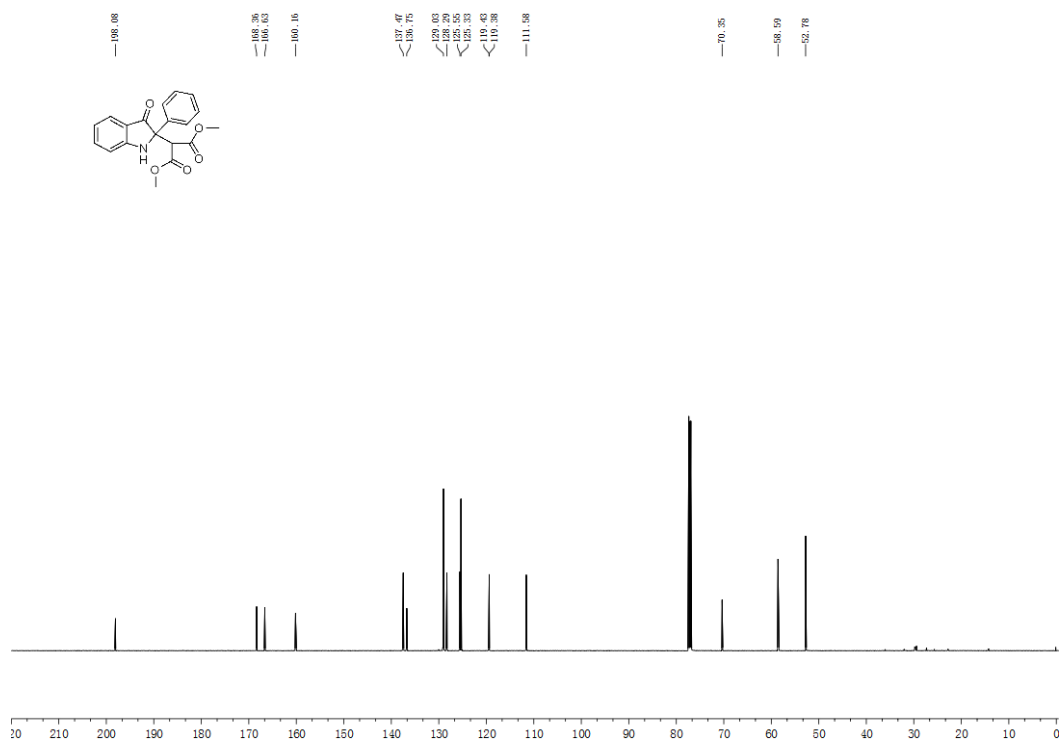

### $^1\text{H}$ NMR spectrum of compound 3m in $\text{CDCl}_3$ (600 MHz)

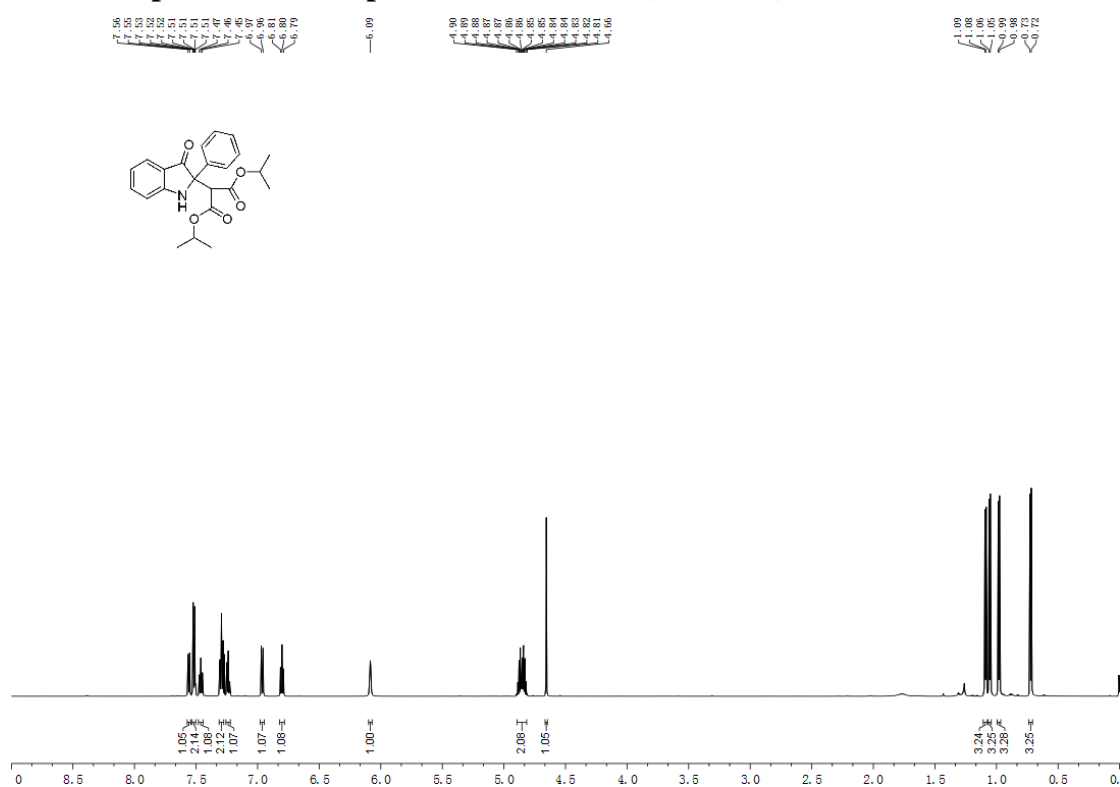

### $^{13}\text{C}$ NMR spectrum of compound 3m in $\text{CDCl}_3$ (151 MHz)

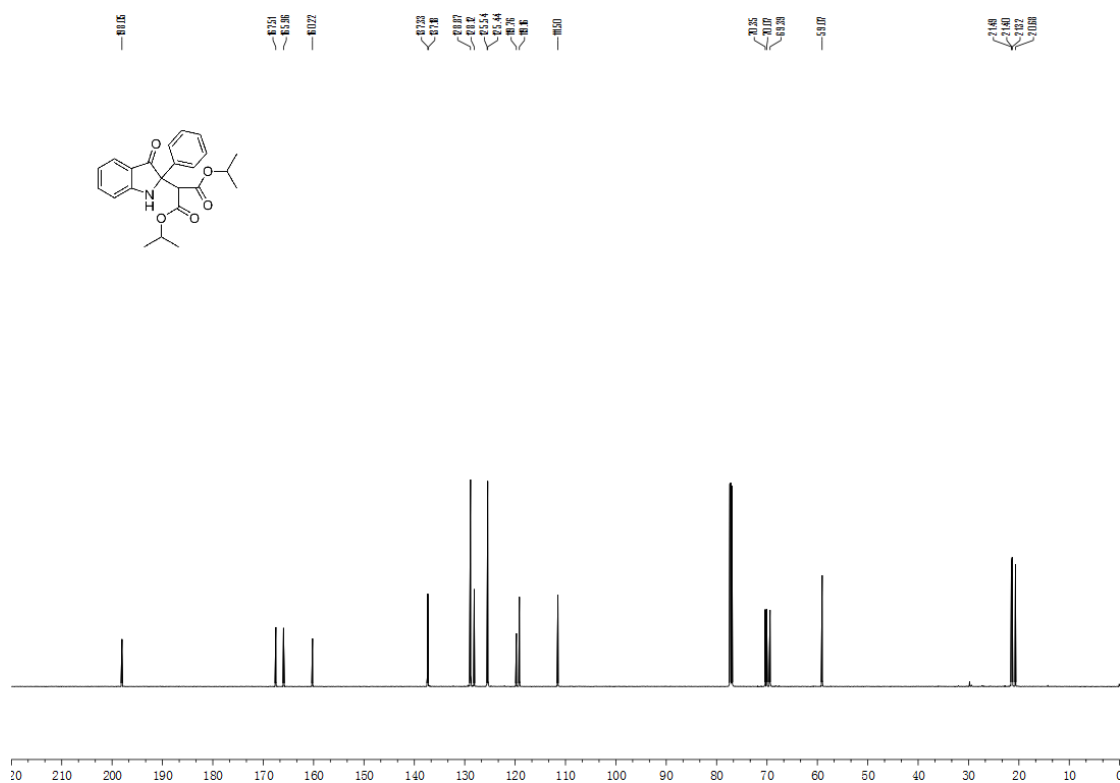

### <sup>1</sup>H NMR spectrum of compound 3n in CDCl<sub>3</sub> (600 MHz)

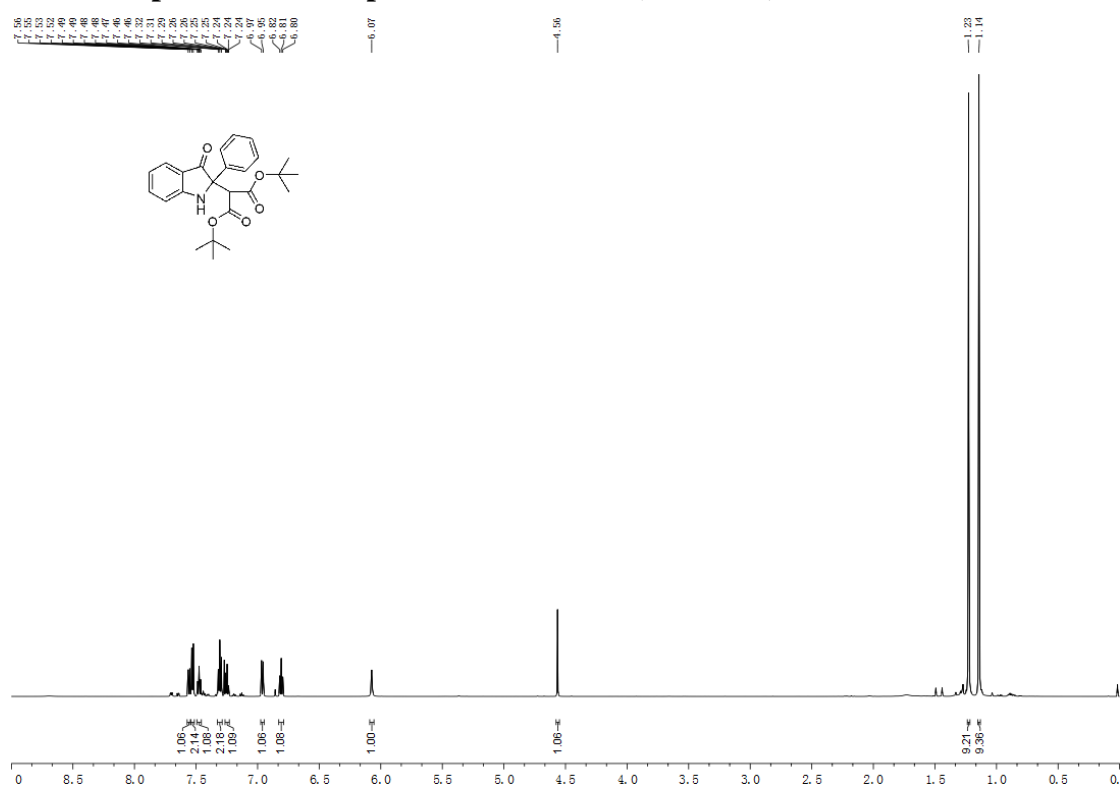

### <sup>13</sup>C NMR spectrum of compound 3n in CDCl<sub>3</sub> (151 MHz)

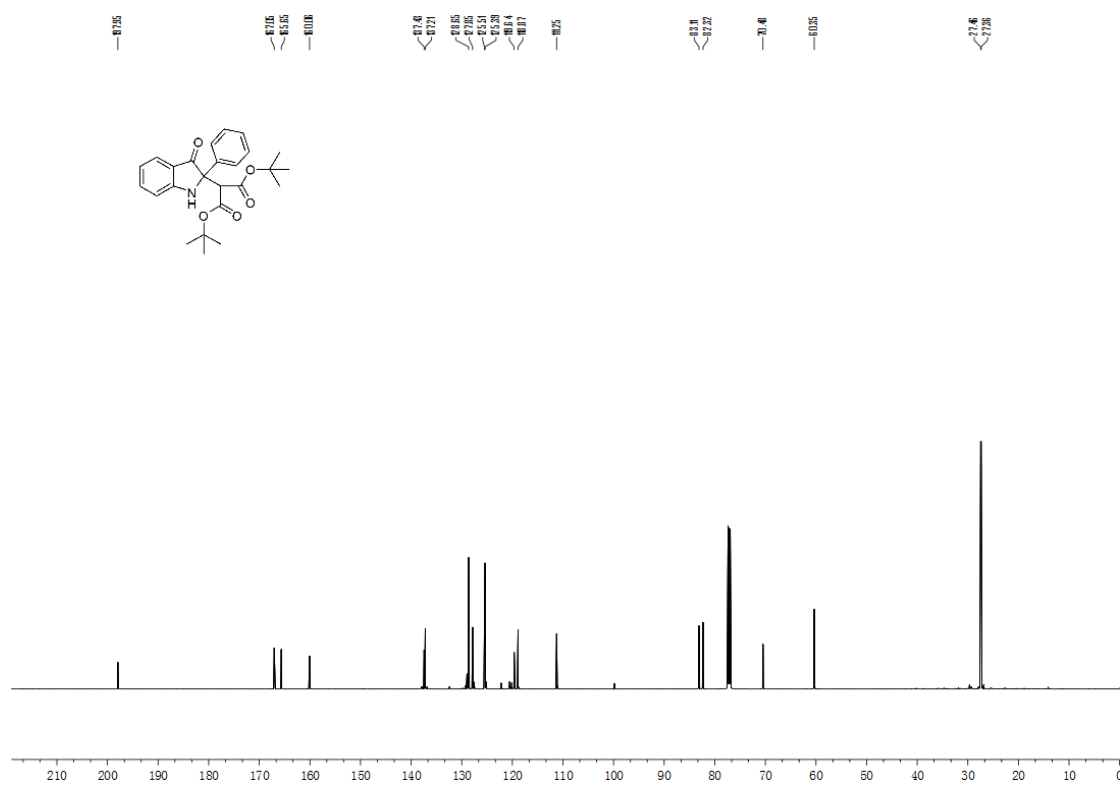

### <sup>1</sup>H NMR spectrum of compound 3o in CDCl<sub>3</sub> (600 MHz)

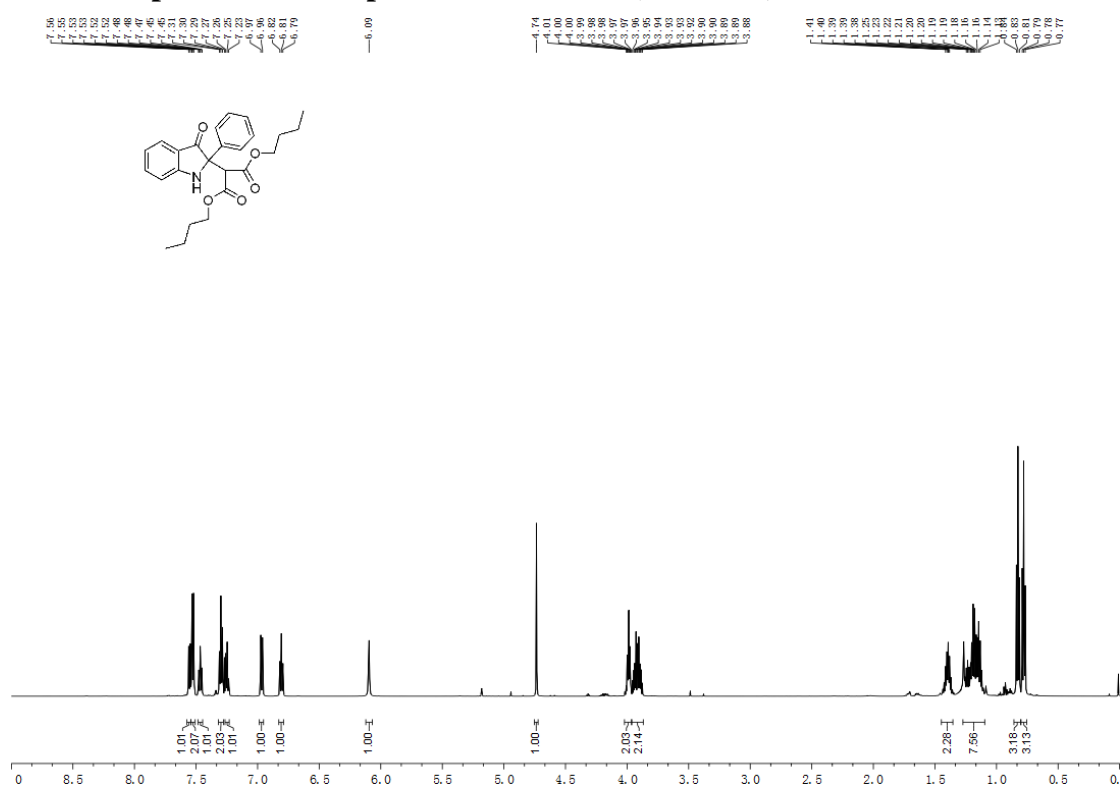

### <sup>13</sup>C NMR spectrum of compound 3o in CDCl<sub>3</sub> (151 MHz)

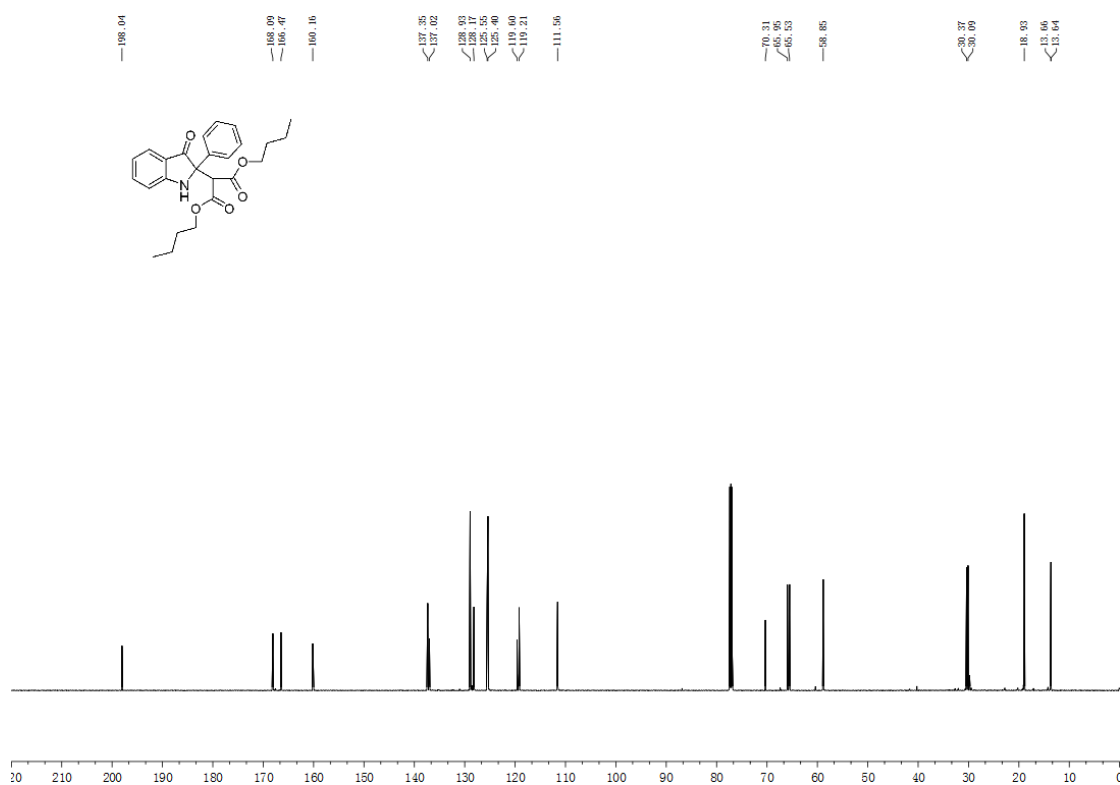



### $^1\text{H}$ NMR spectrum of compound 3p in $\text{CDCl}_3$ (600 MHz)

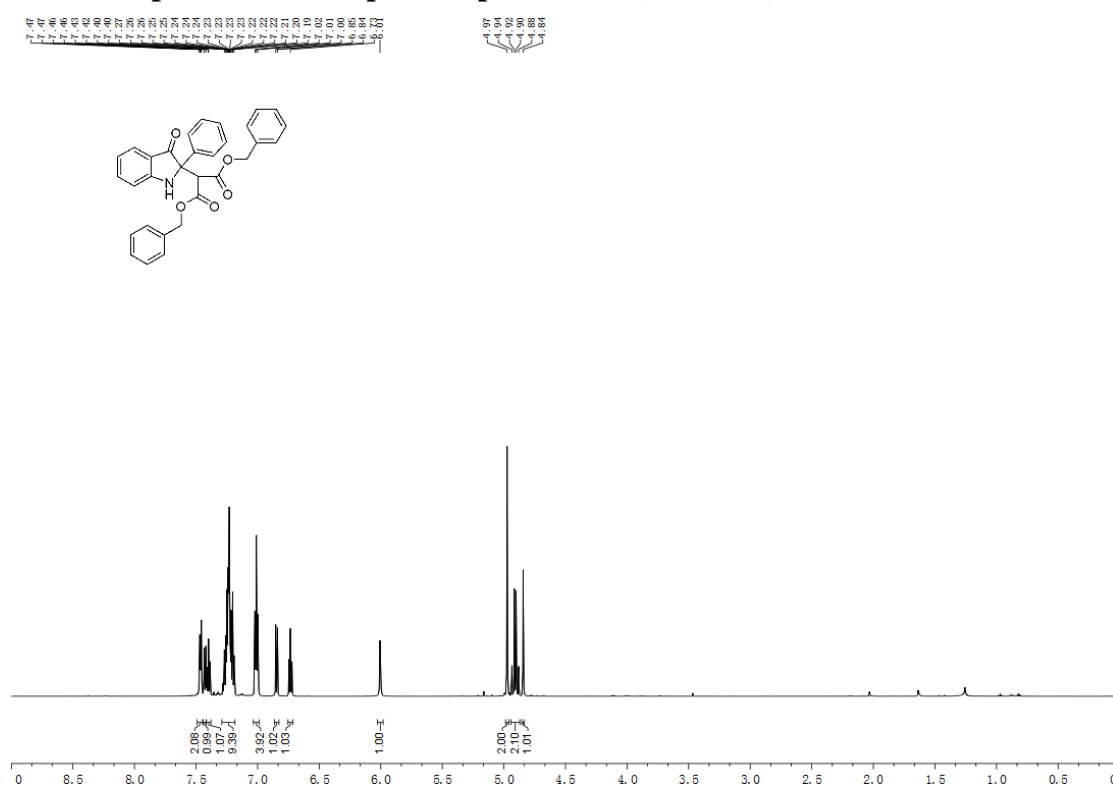

### $^{13}\text{C}$ NMR spectrum of compound 3p in $\text{CDCl}_3$ (151 MHz)

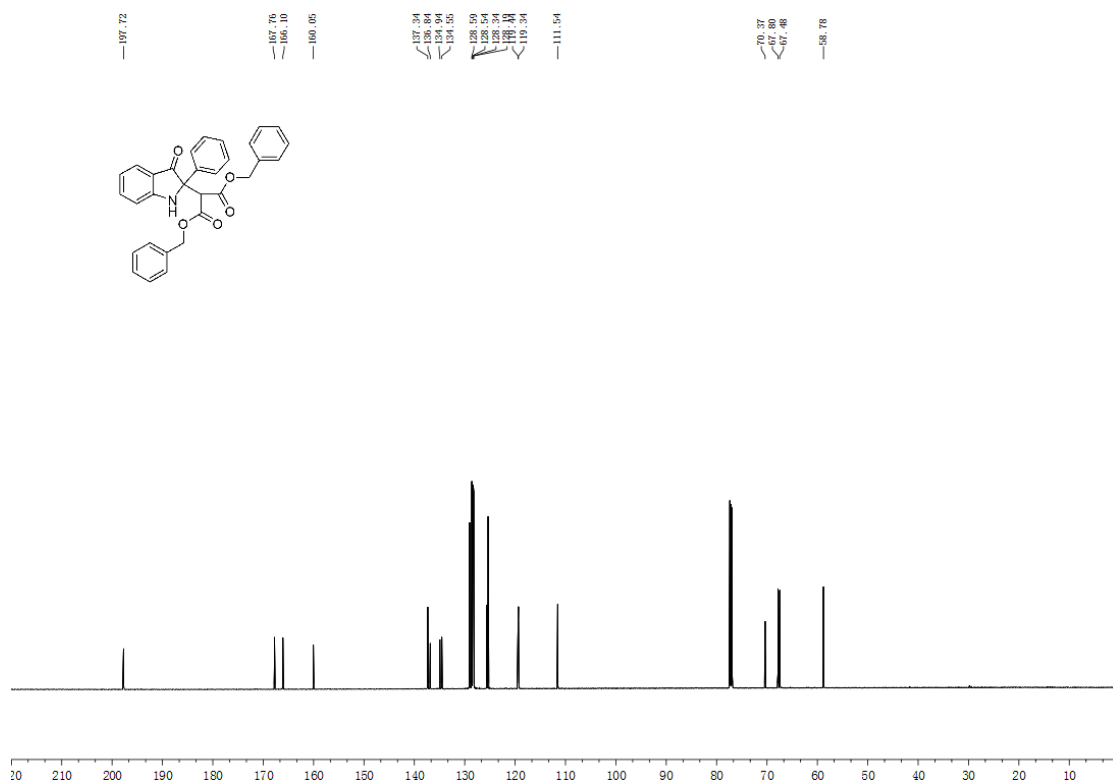

### $^1\text{H}$ NMR spectrum of compound 3q in $\text{CDCl}_3$ (600 MHz)

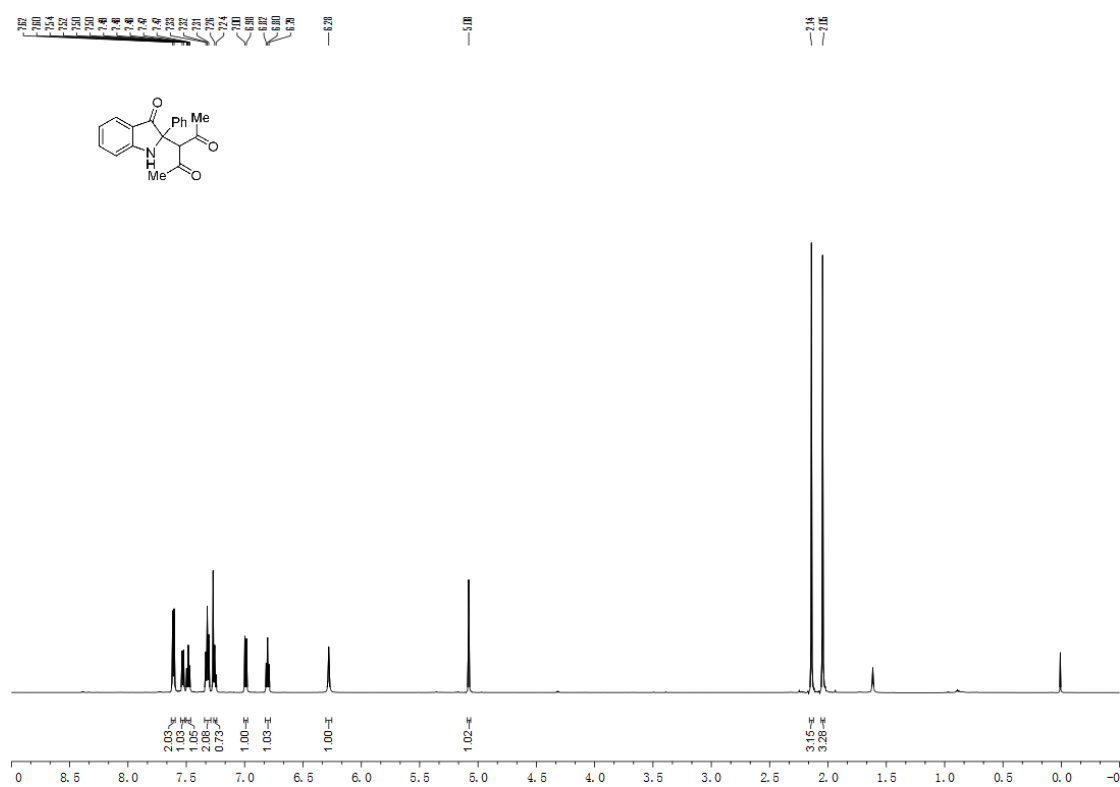

### $^{13}\text{C}$ NMR spectrum of compound 3q in $\text{CDCl}_3$ (151 MHz)

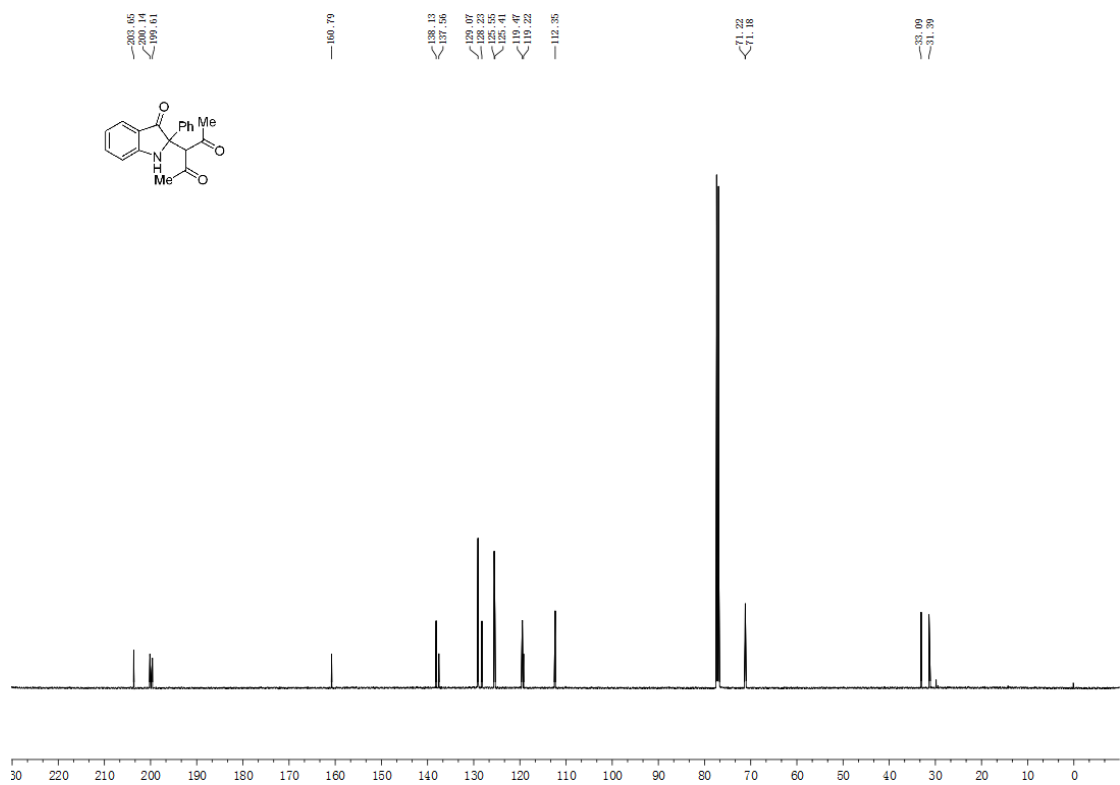

**<sup>1</sup>H NMR spectrum of compound 5a in acetone-*d*<sub>6</sub> (600 MHz)**

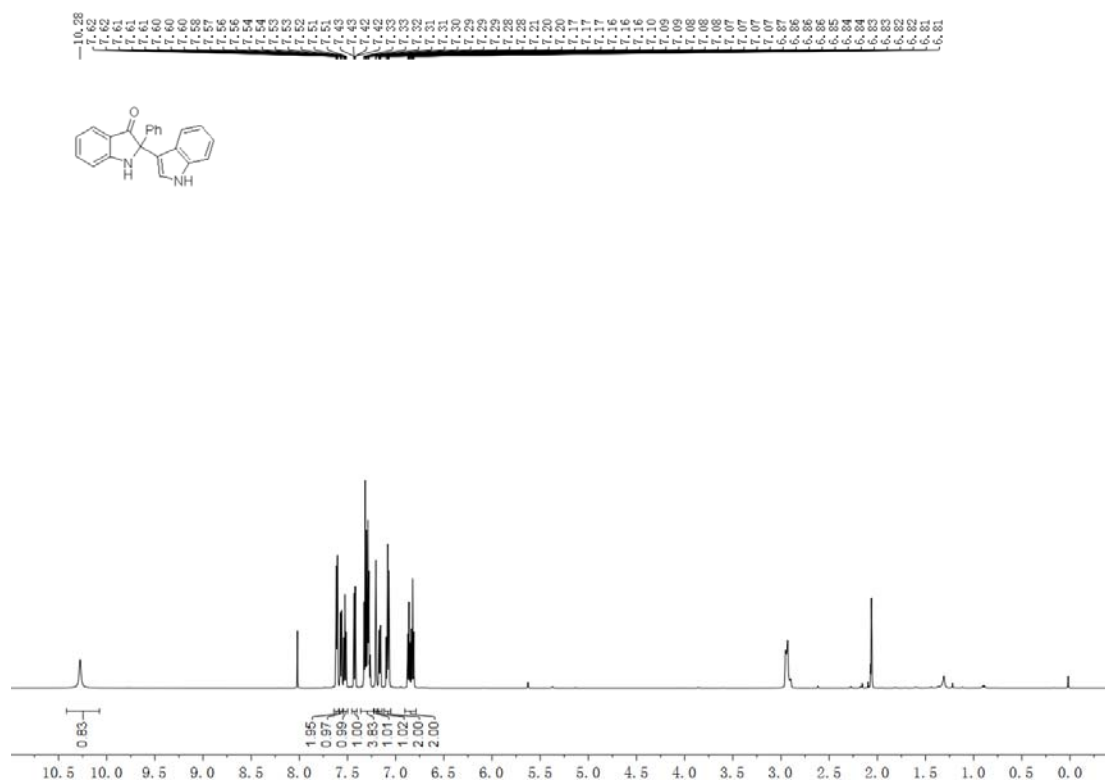

**<sup>13</sup>C NMR spectrum of compound 5a in acetone-*d*<sub>6</sub> (151 MHz)**

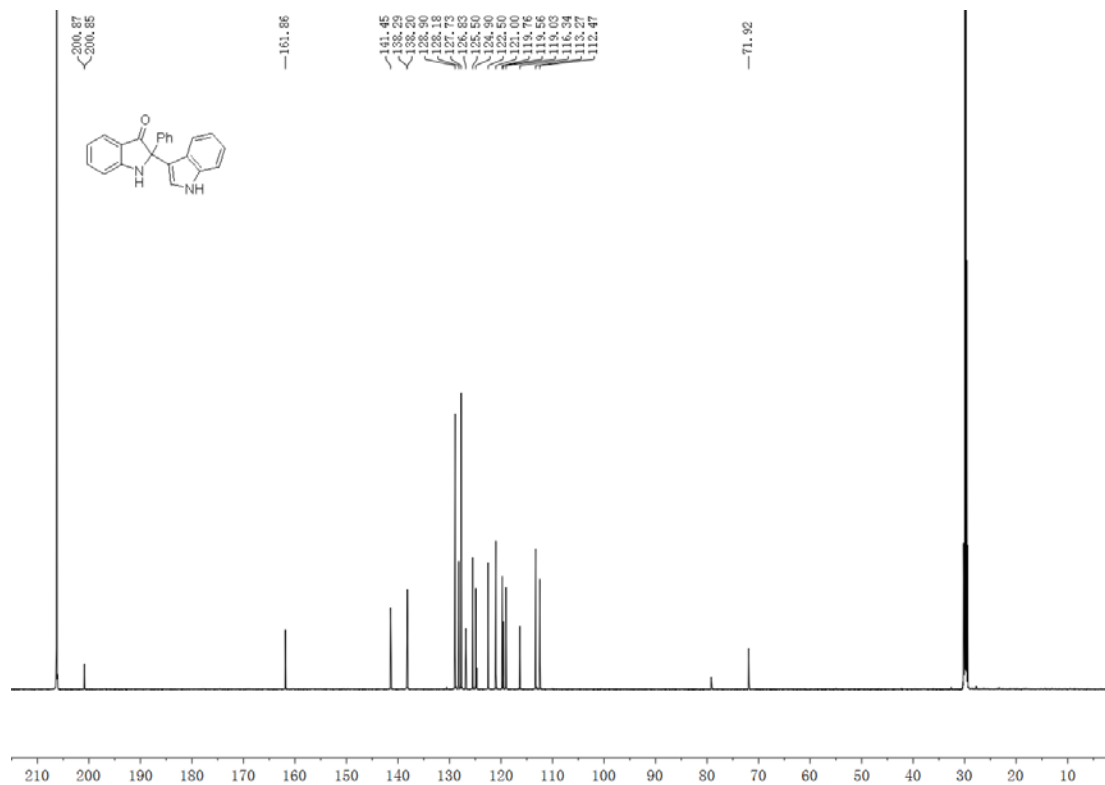

### <sup>1</sup>H NMR spectrum of compound 5b in CDCl<sub>3</sub> (600 MHz)

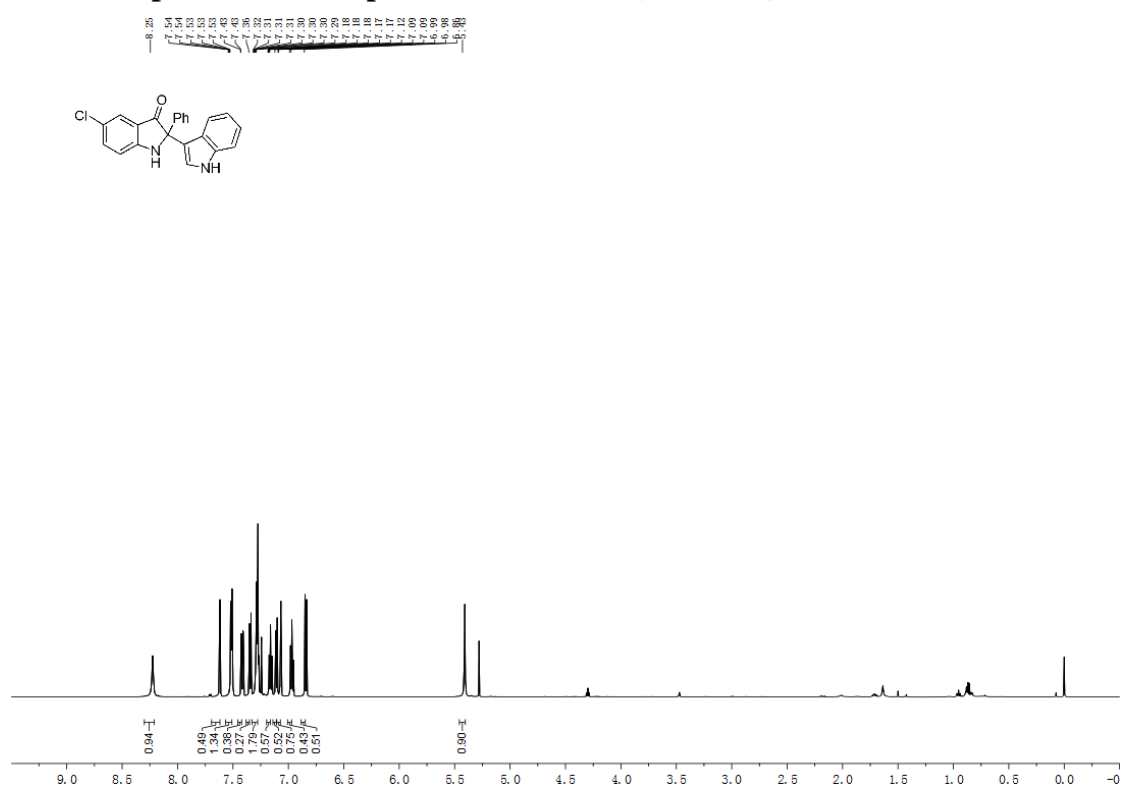

### <sup>13</sup>C NMR spectrum of compound 5b in CDCl<sub>3</sub> (151 MHz)

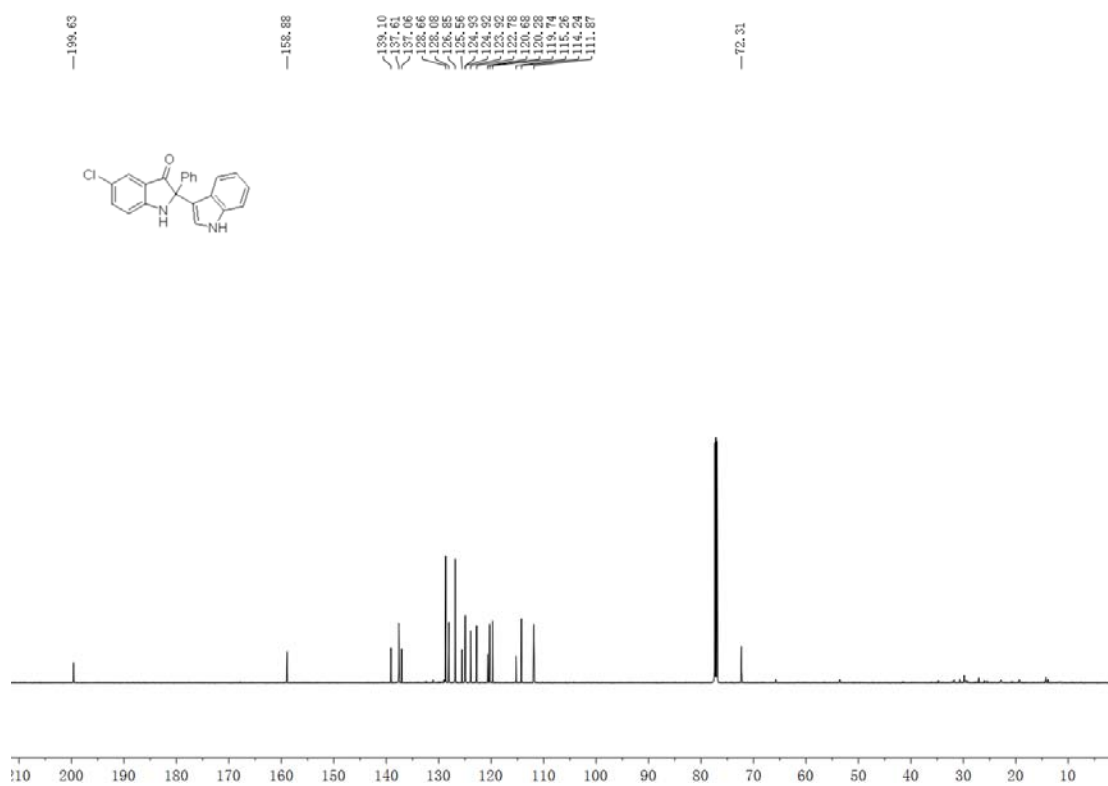

### $^1\text{H}$ NMR spectrum of compound 5c in $\text{CDCl}_3$ (600 MHz)

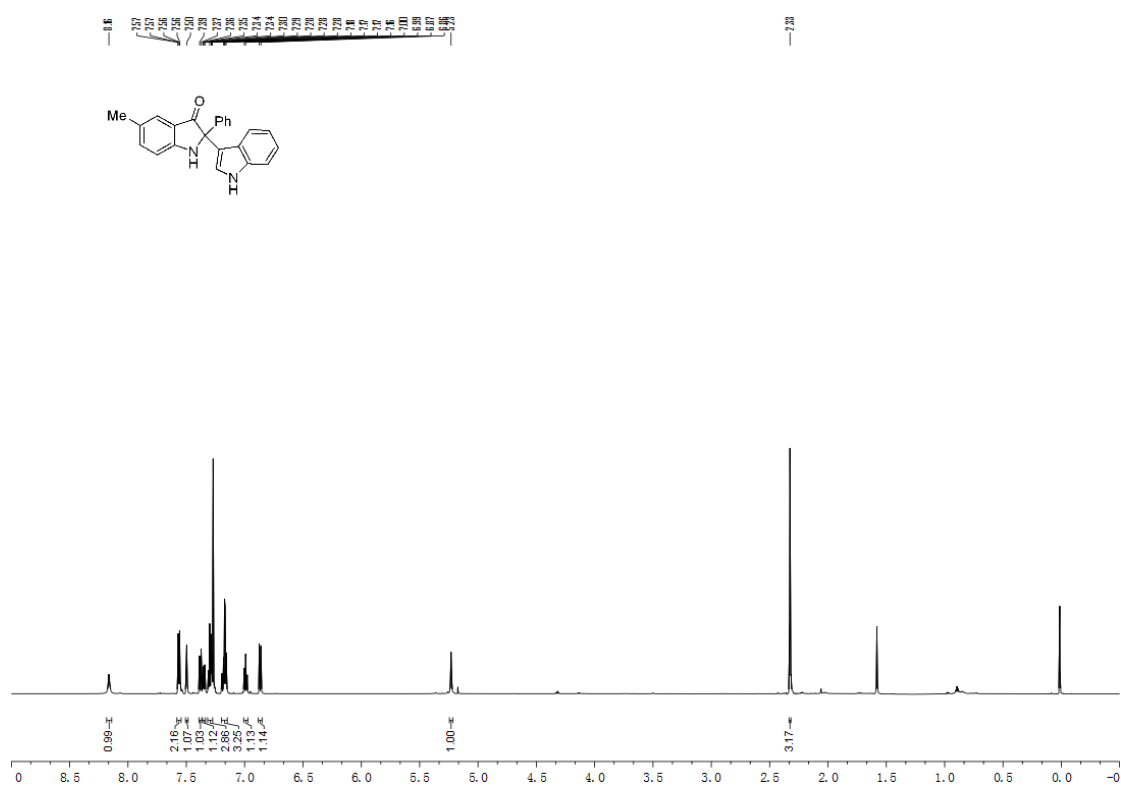

### $^{13}\text{C}$ NMR spectrum of compound 5c in $\text{CDCl}_3$ (151 MHz)

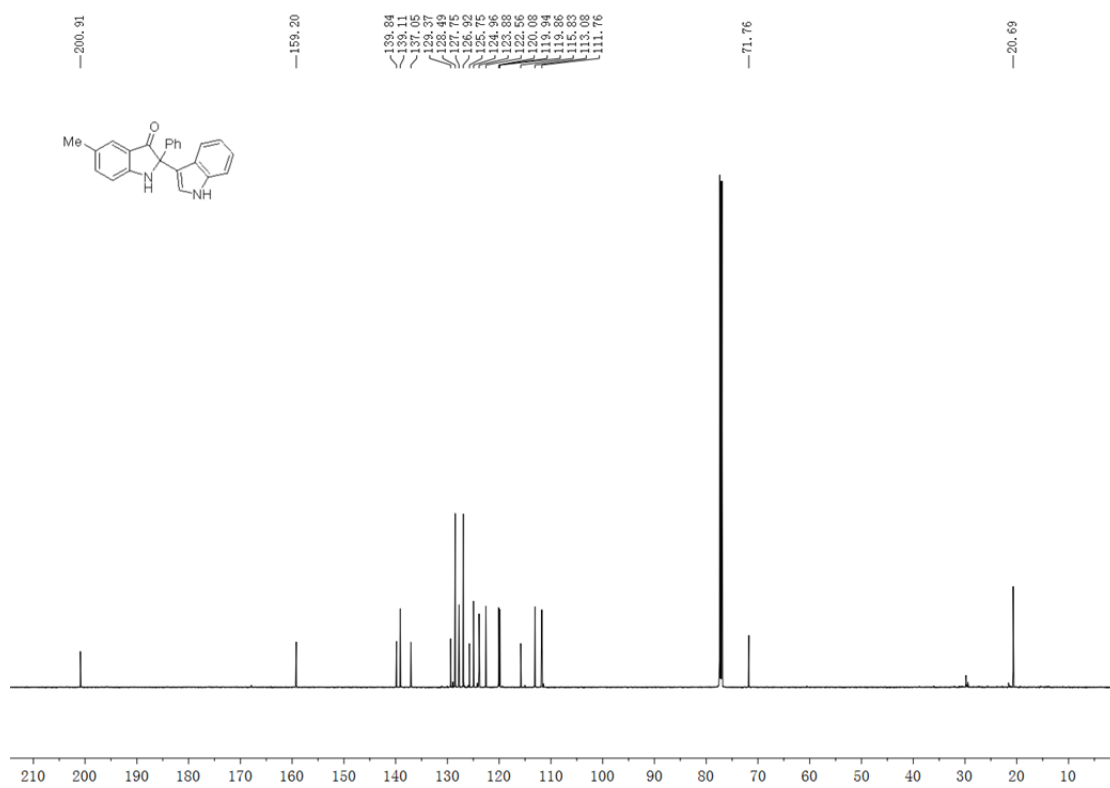



**$^1\text{H}$  NMR spectrum of compound 5e in acetone- $d_6$  (600 MHz)**

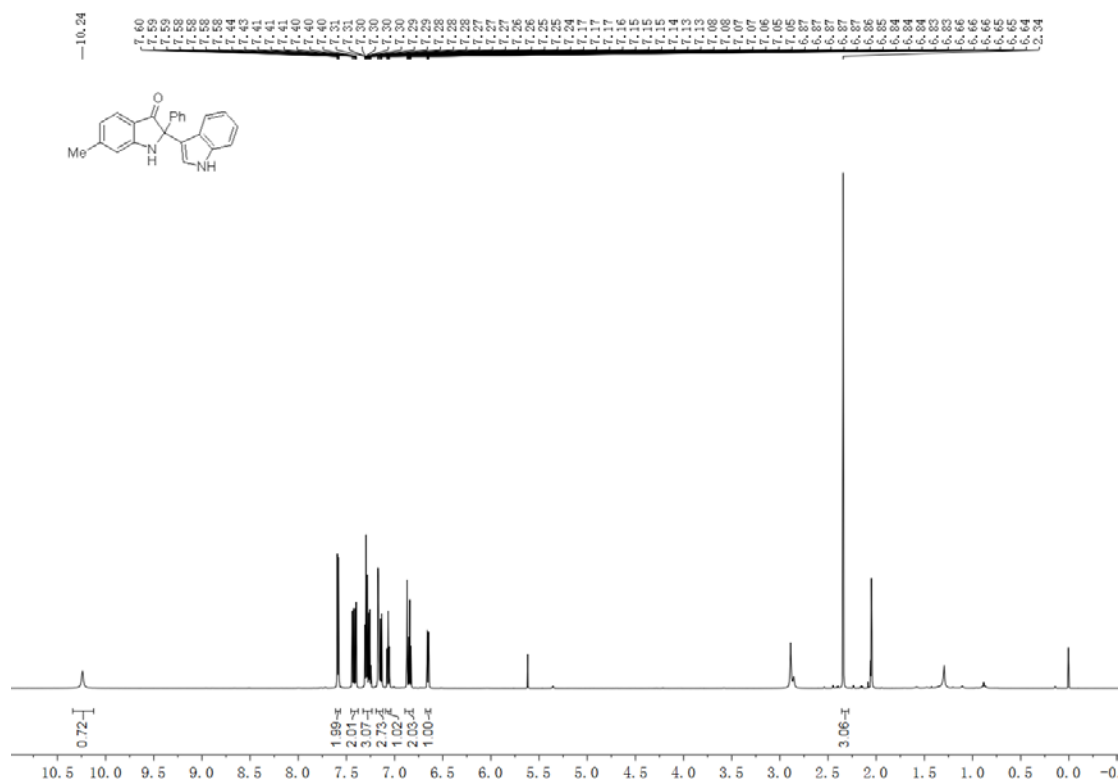

**$^{13}\text{C}$  NMR spectrum of compound 5e in acetone- $d_6$  (151 MHz)**

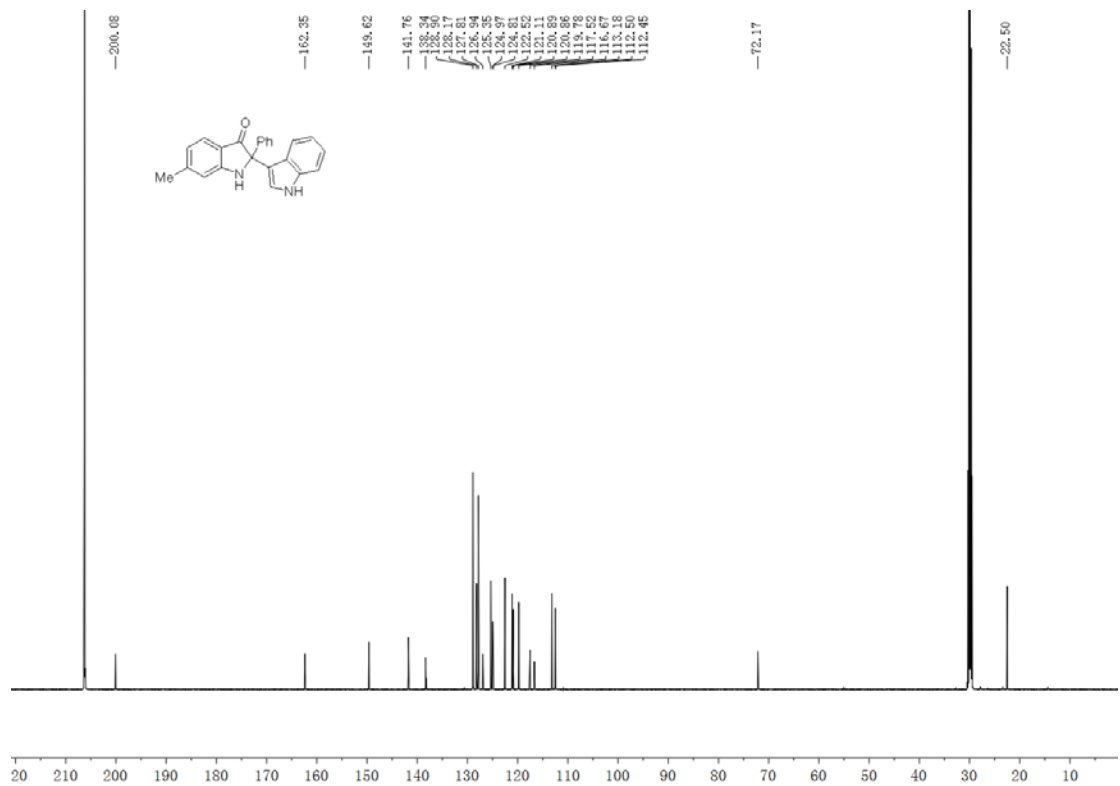

**<sup>1</sup>H NMR spectrum of compound 5f in CDCl<sub>3</sub> (600 MHz)**

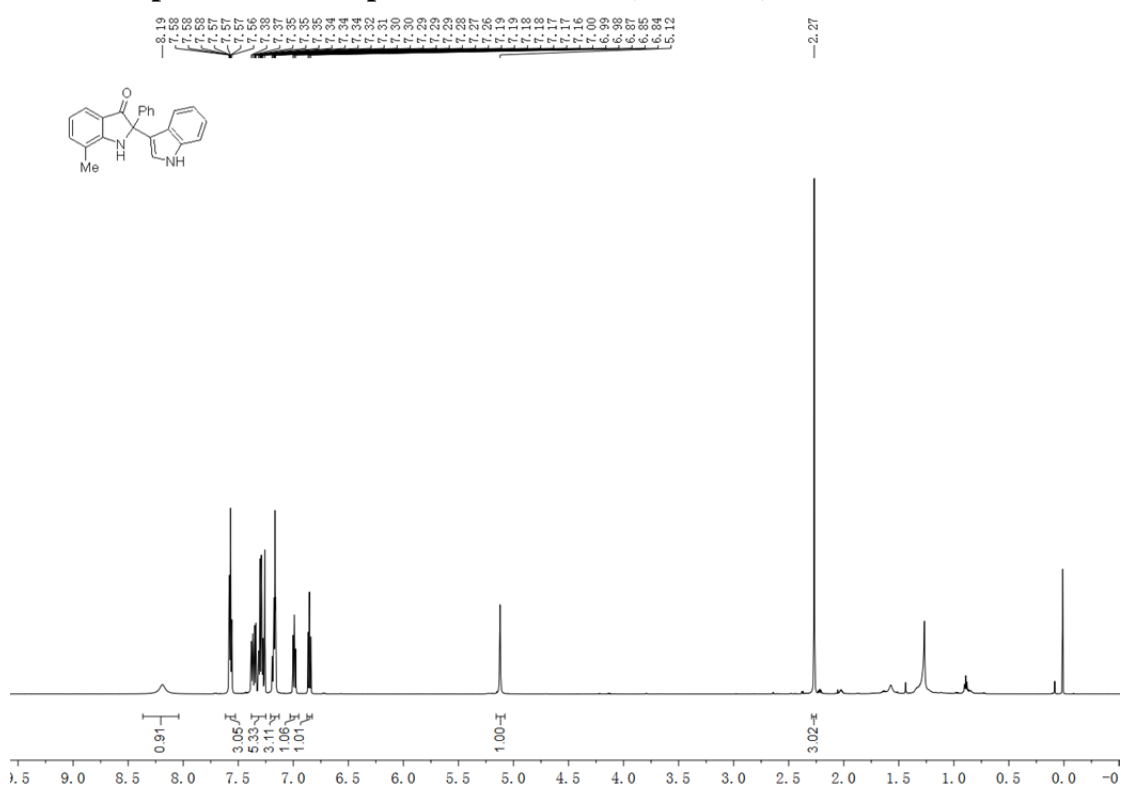

**<sup>13</sup>C NMR spectrum of compound 5f in CDCl<sub>3</sub> (151 MHz)**

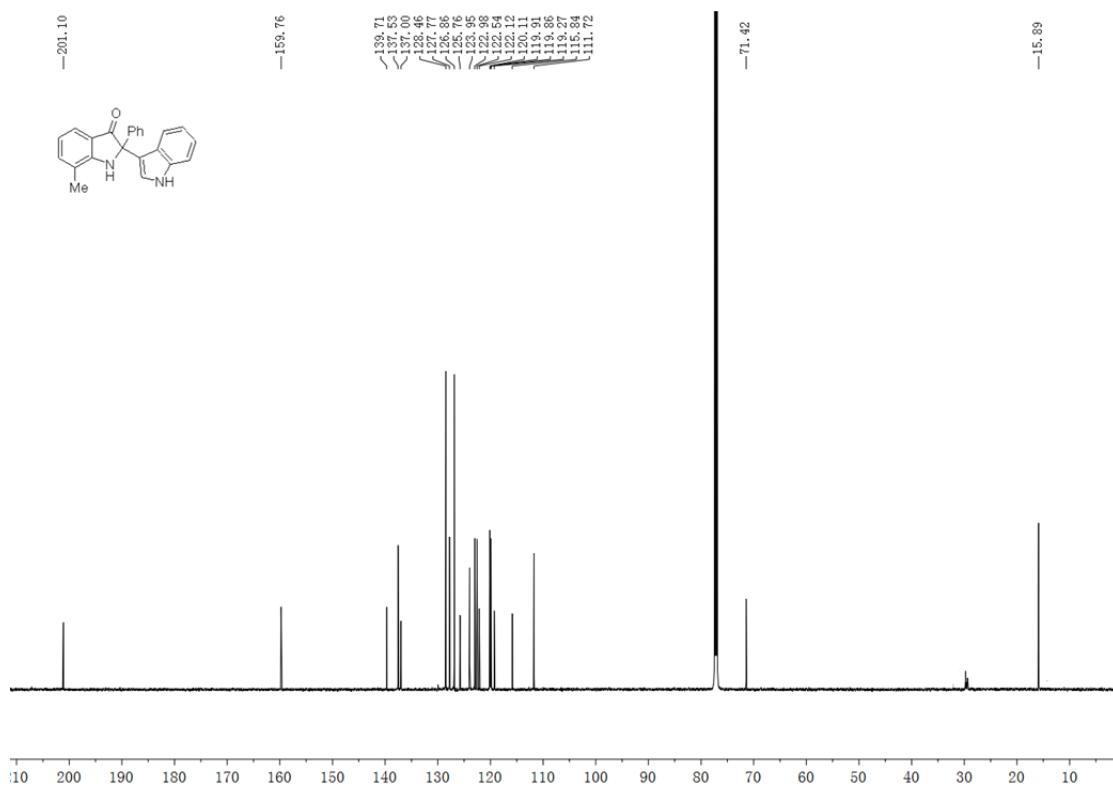



**<sup>1</sup>H NMR spectrum of compound 5g in CDCl<sub>3</sub> (600 MHz)**

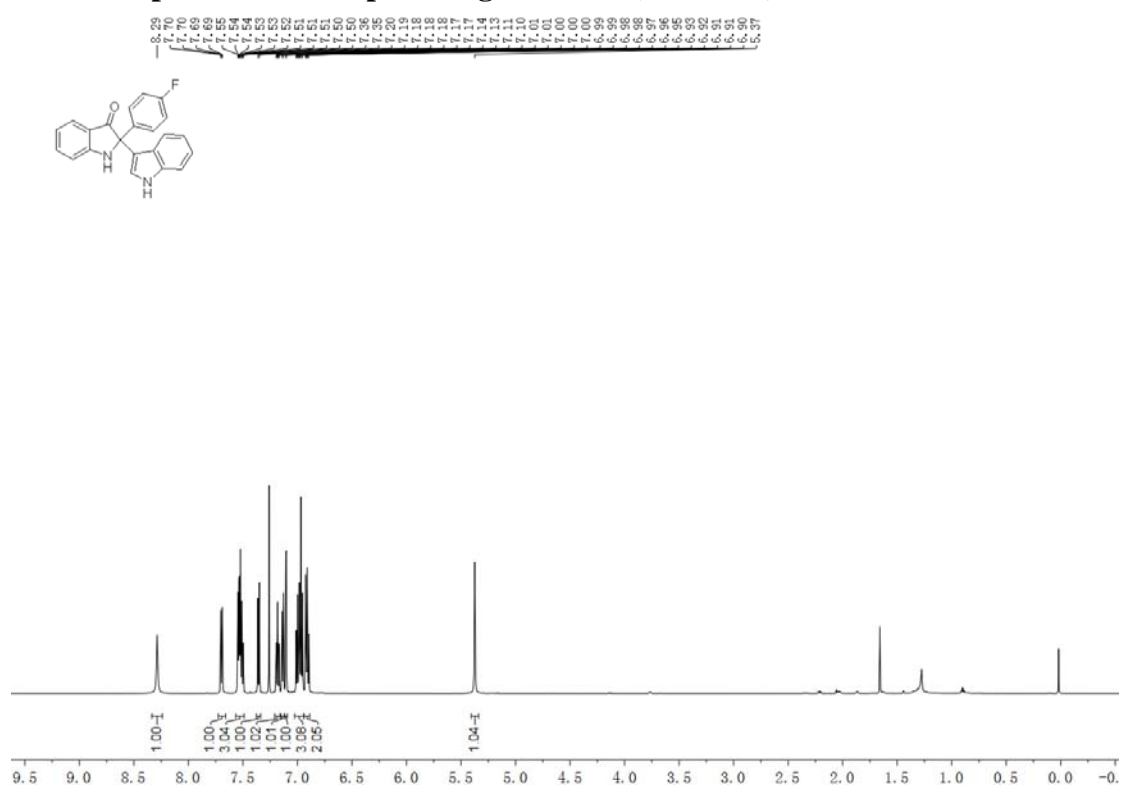

**<sup>13</sup>C NMR spectrum of compound 5g in CDCl<sub>3</sub> (151 MHz)**

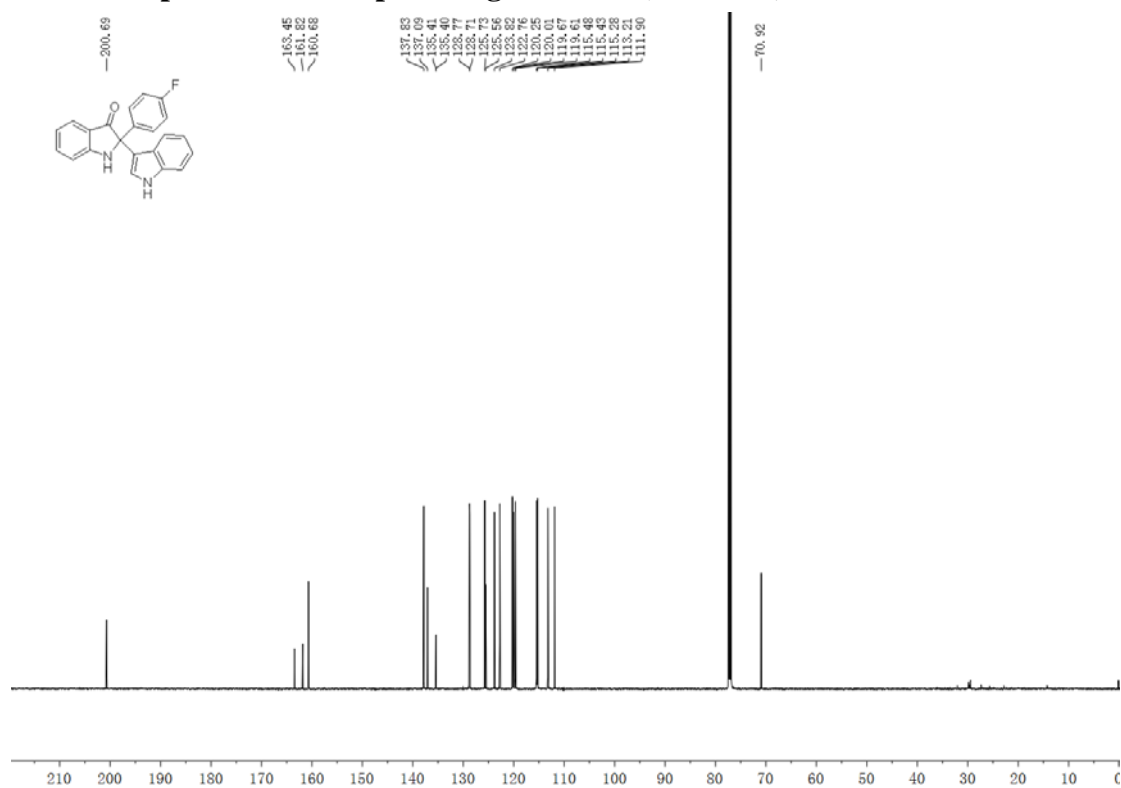

**<sup>1</sup>H NMR spectrum of compound 5h in acetone-*d*<sub>6</sub> (600 MHz)**

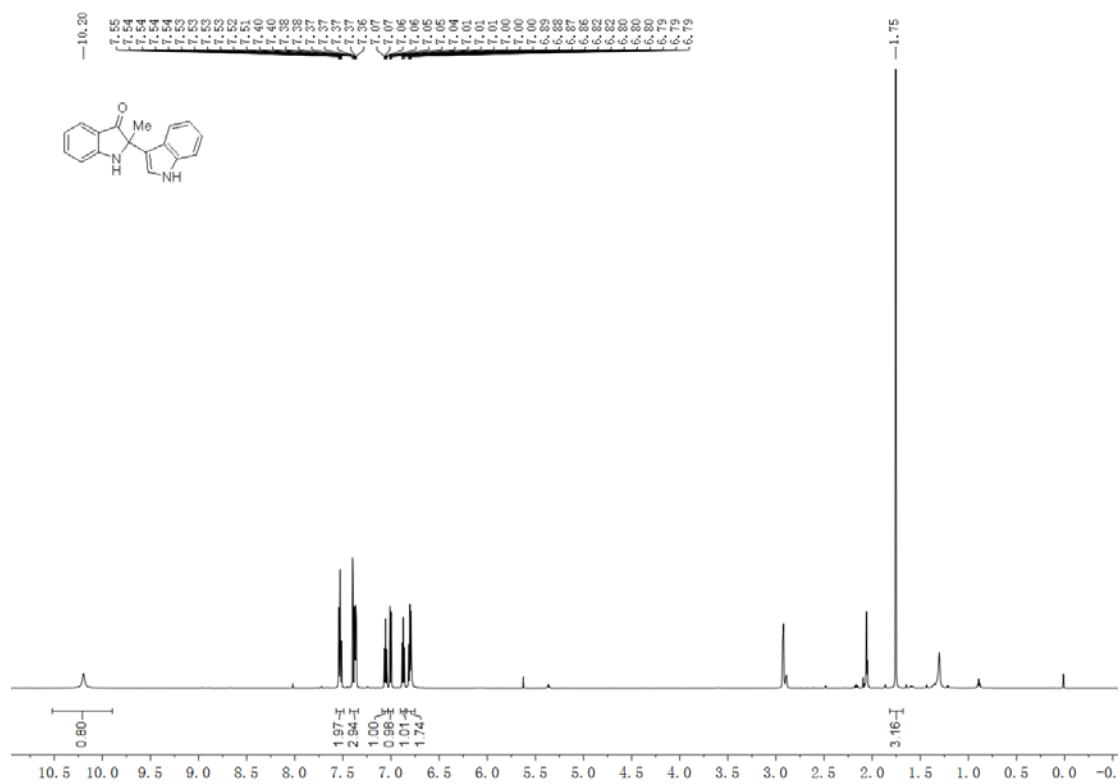

**<sup>13</sup>C NMR spectrum of compound 5h in acetone-*d*<sub>6</sub> (151 MHz)**

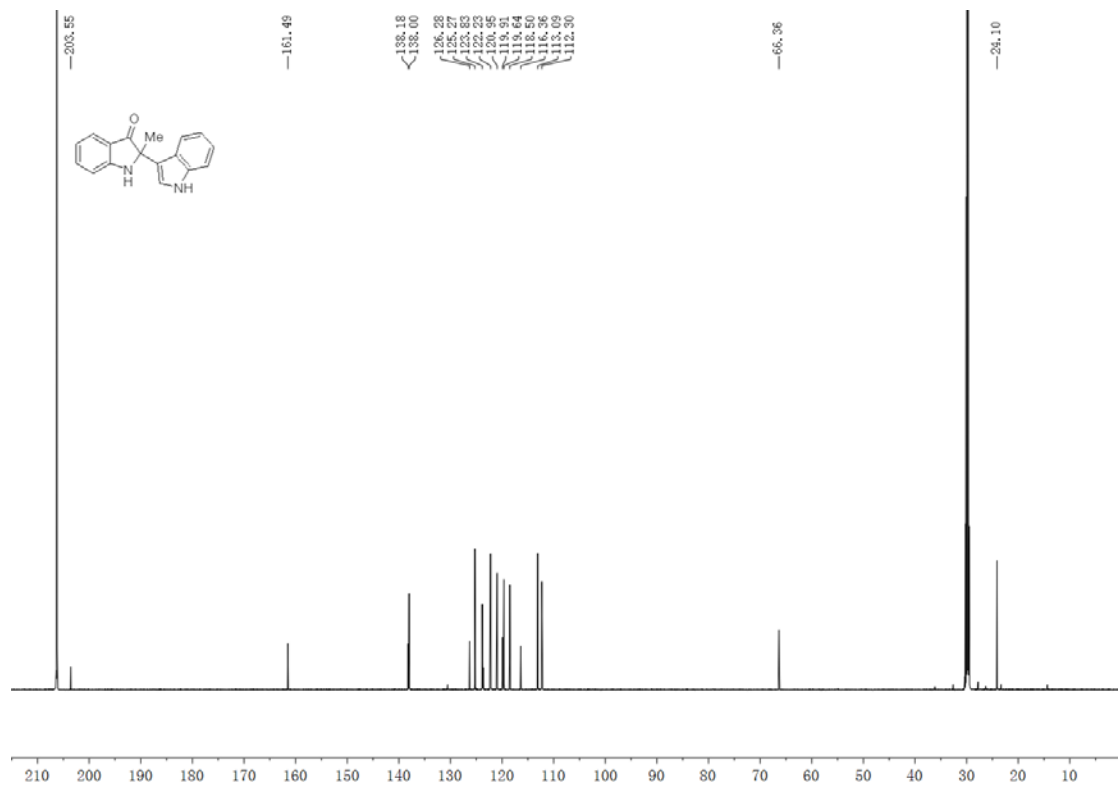



### <sup>1</sup>H NMR spectrum of compound 5j in CDCl<sub>3</sub> (600 MHz)

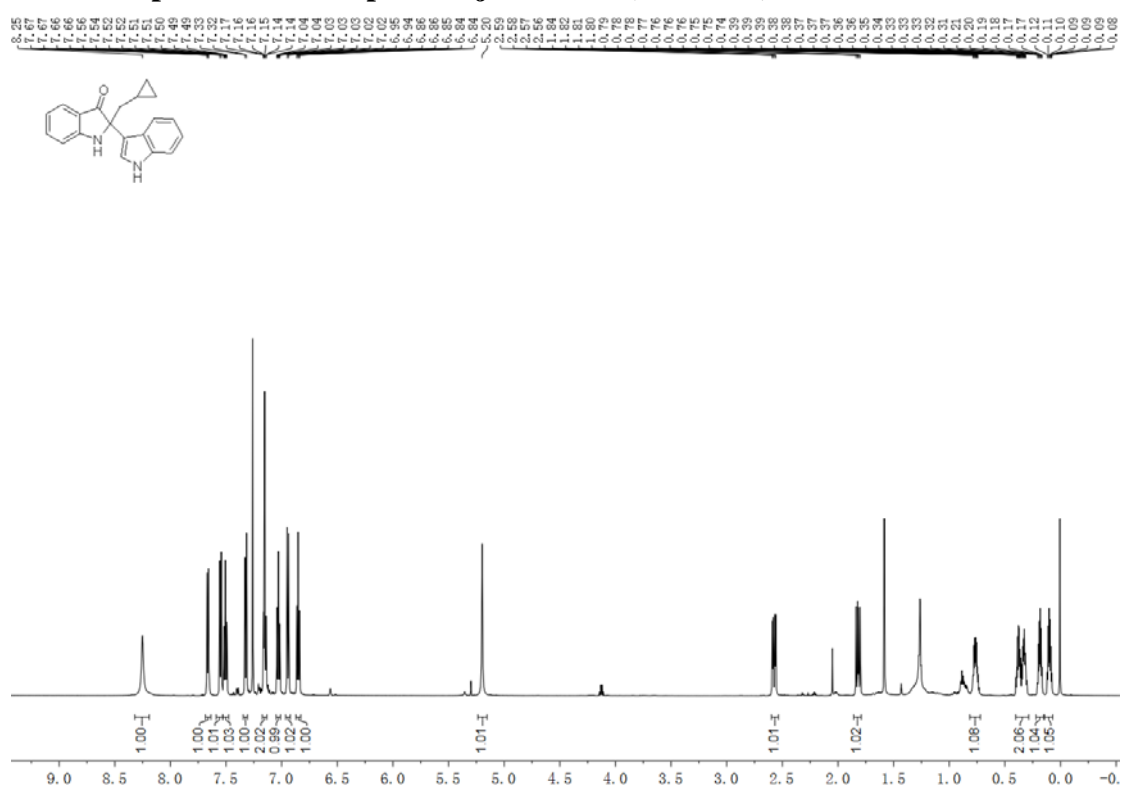

### <sup>13</sup>C NMR spectrum of compound 5j in CDCl<sub>3</sub> (151 MHz)

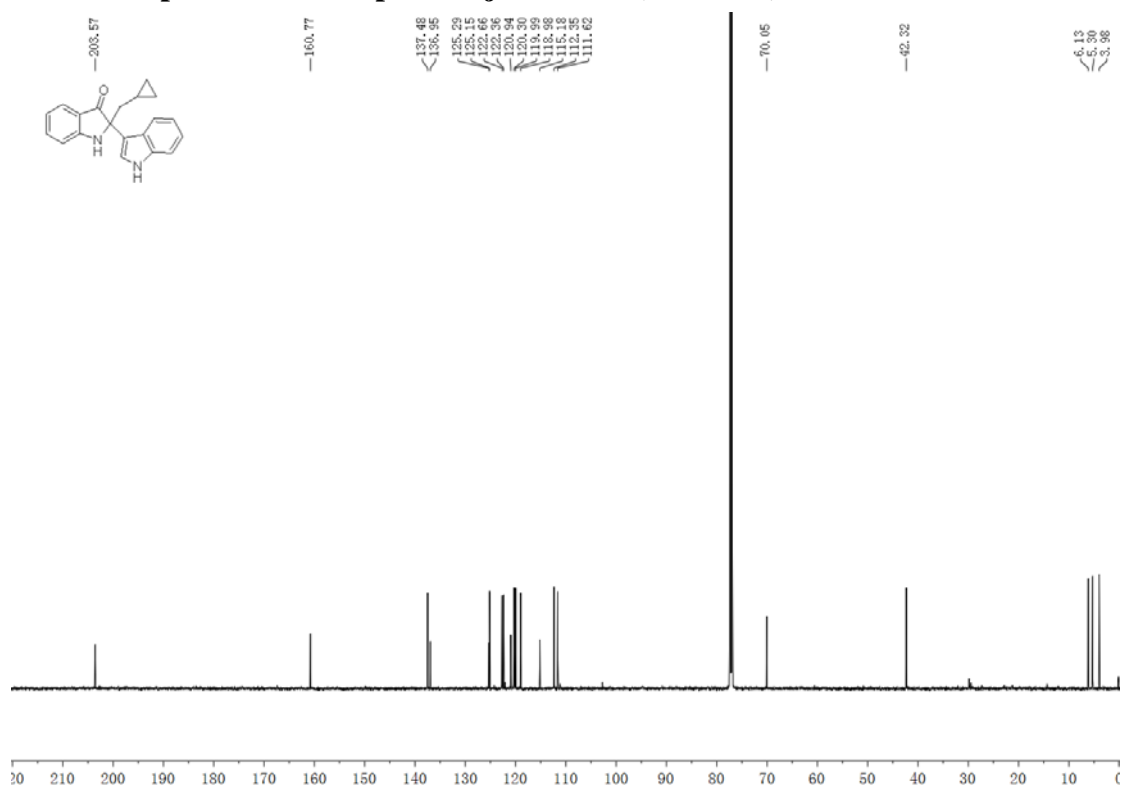

**$^1\text{H}$  NMR spectrum of compound 5k in  $\text{CDCl}_3$  (600 MHz)**

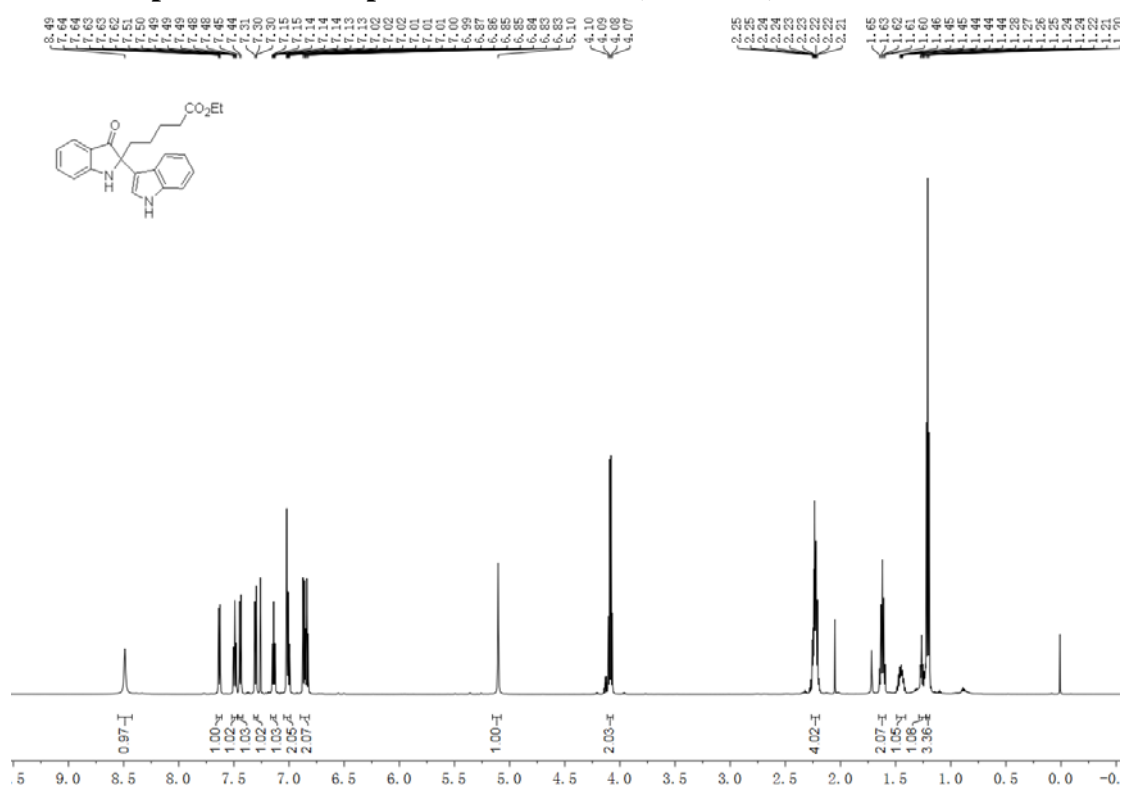

**$^{13}\text{C}$  NMR spectrum of compound 5k in  $\text{CDCl}_3$  (151 MHz)**

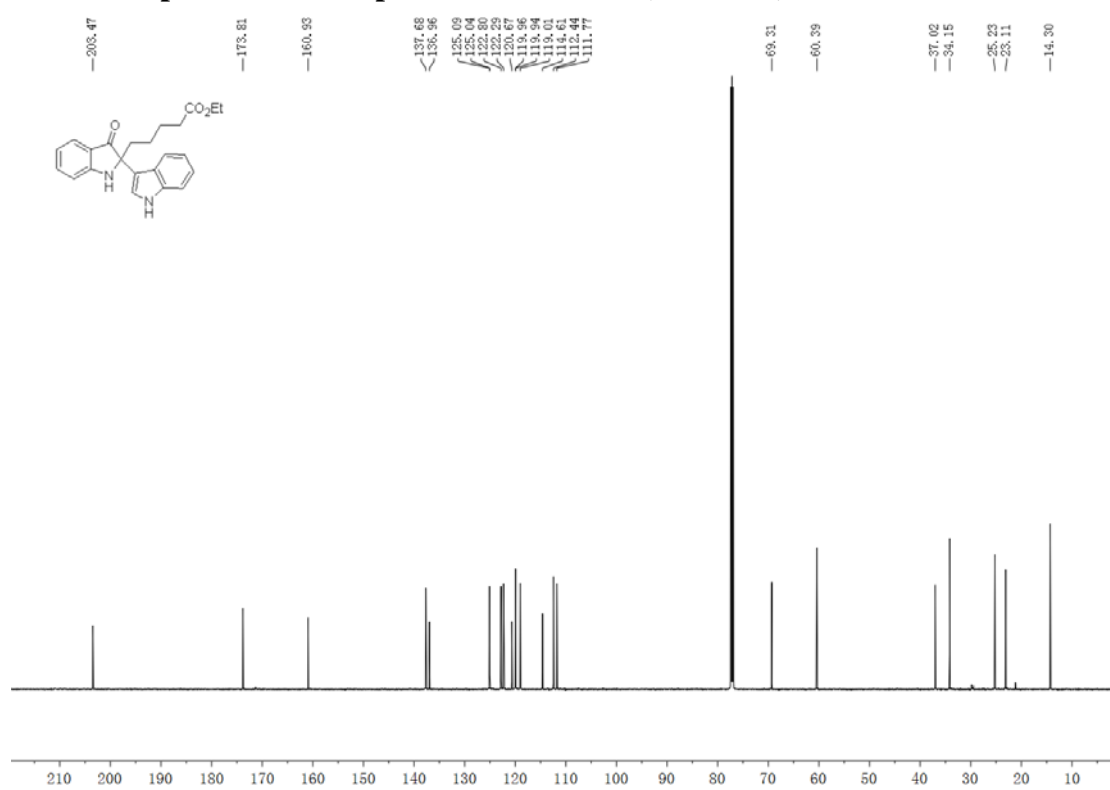

### $^1\text{H}$ NMR spectrum of compound 5l in $\text{CDCl}_3$ (600 MHz)

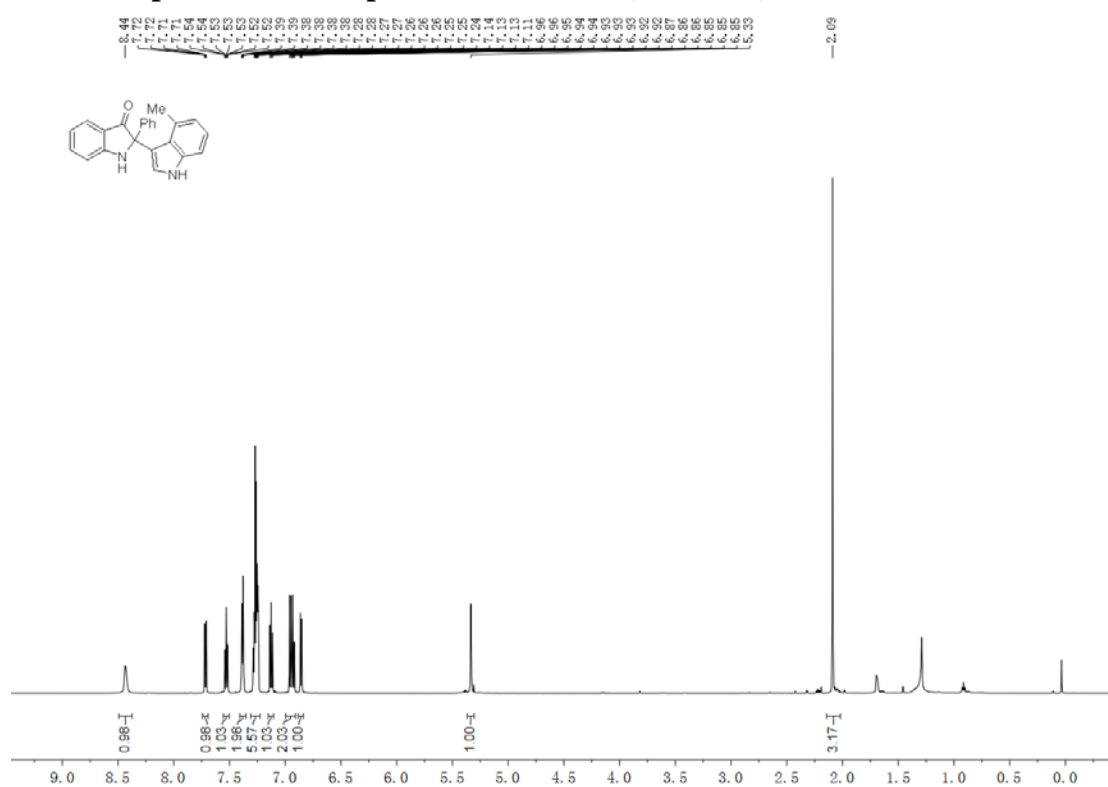

### $^{13}\text{C}$ NMR spectrum of compound 5l in $\text{CDCl}_3$ (151 MHz)

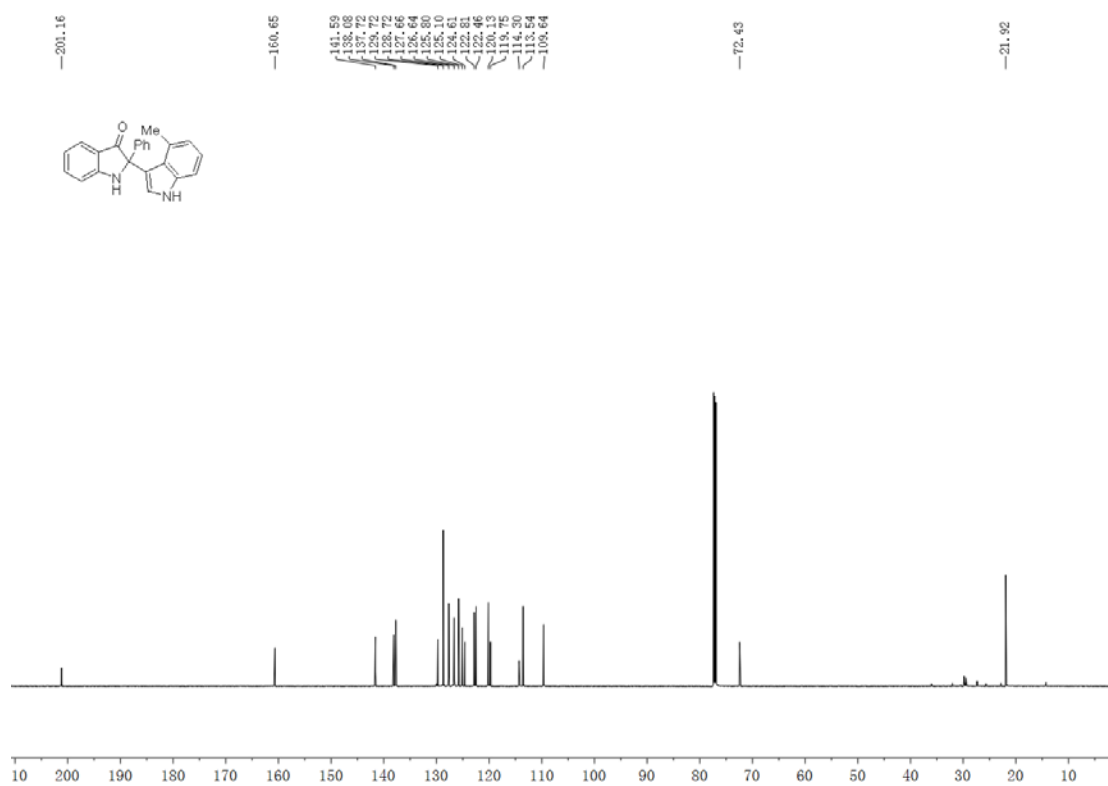

**$^1\text{H}$  NMR spectrum of compound 5m in  $\text{CDCl}_3$  (600 MHz)**

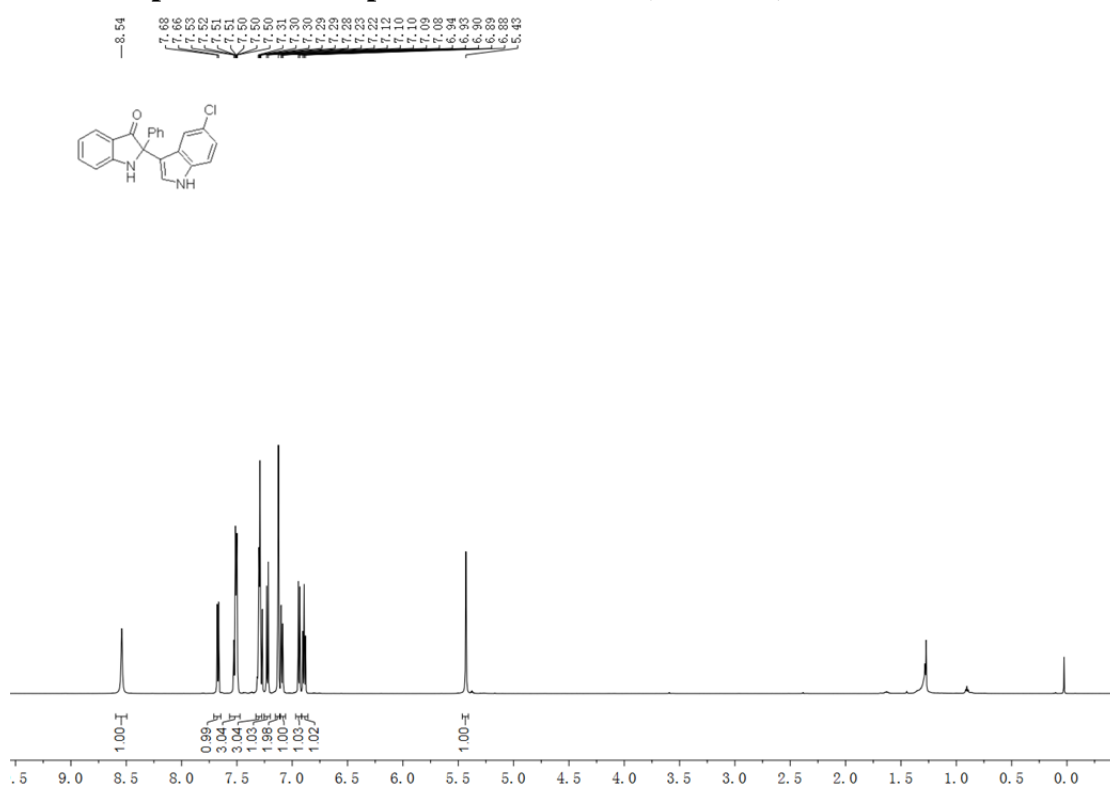

**$^{13}\text{C}$  NMR spectrum of compound 5m in  $\text{CDCl}_3$  (151 MHz)**

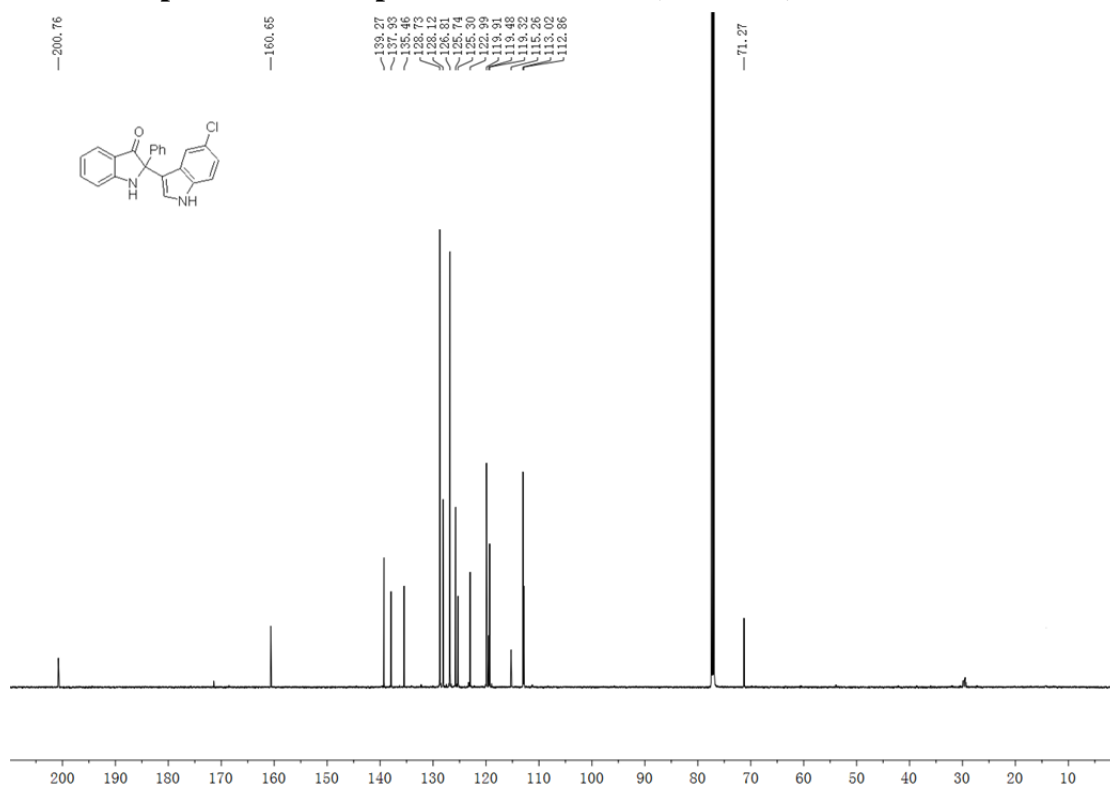

### $^1\text{H}$ NMR spectrum of compound 5n in $\text{CDCl}_3$ (600 MHz)

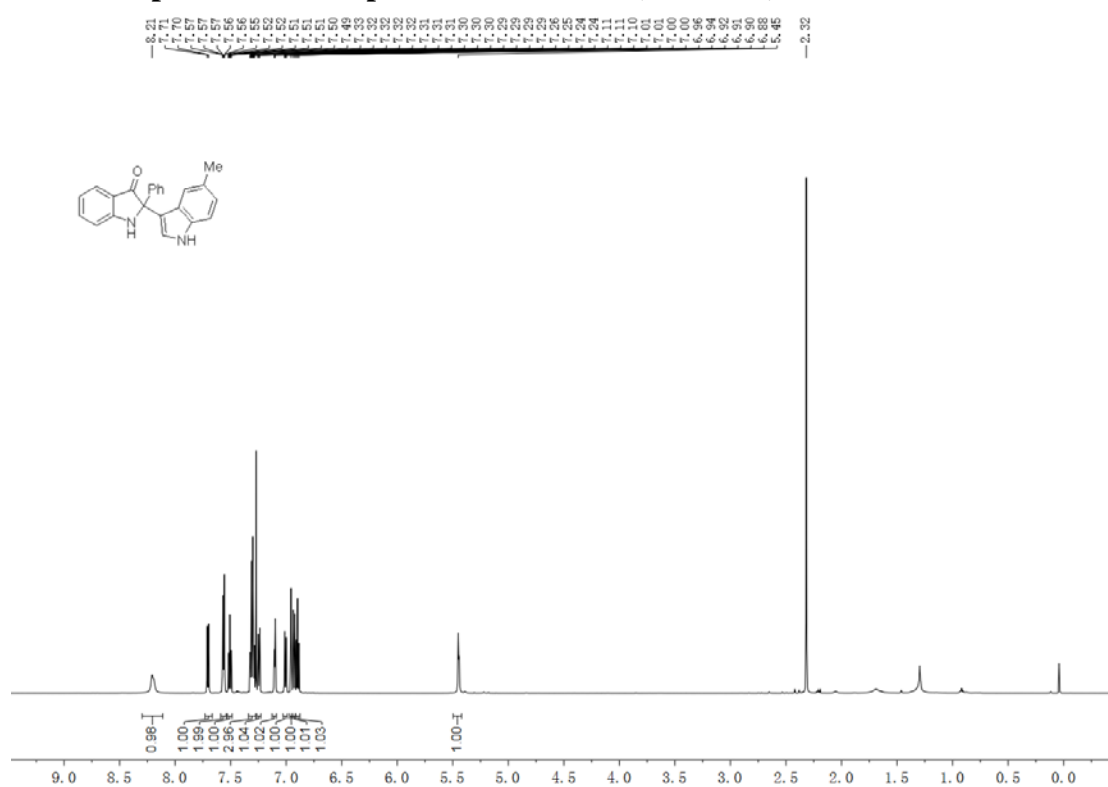

### $^{13}\text{C}$ NMR spectrum of compound 5n in $\text{CDCl}_3$ (151 MHz)

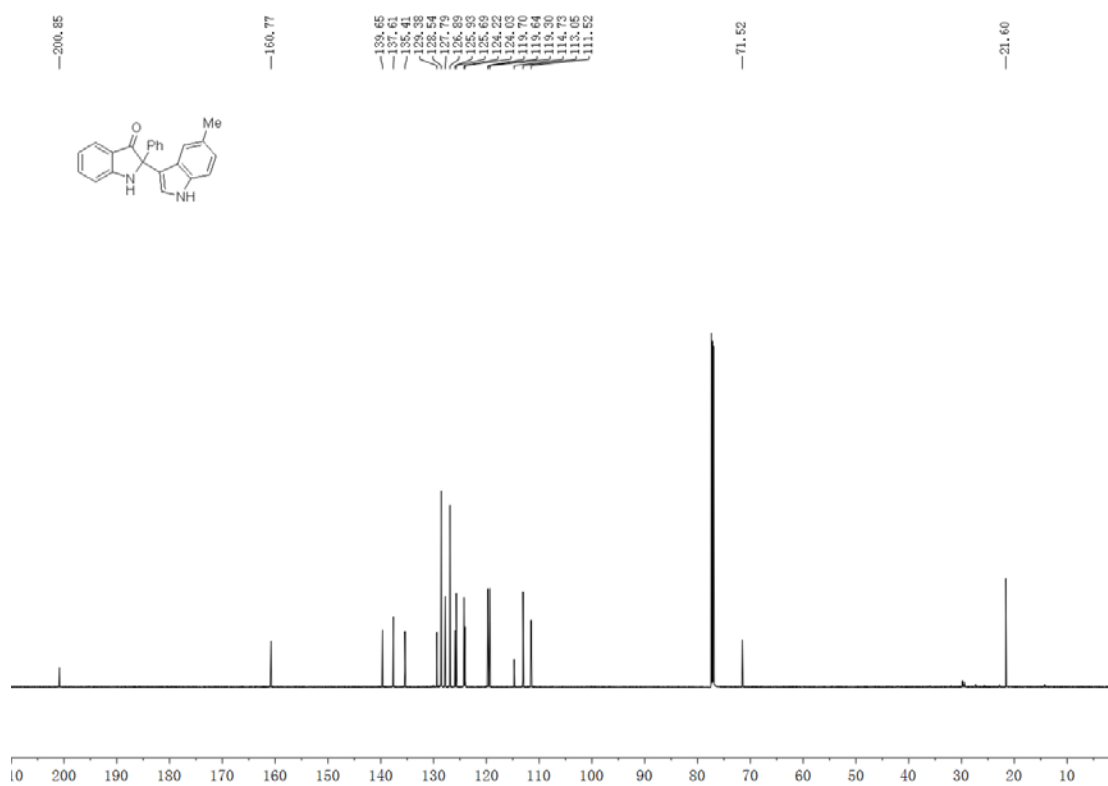



# $^1\text{H}$ NMR spectrum of compound 5o in $\text{CDCl}_3$ (600 MHz)

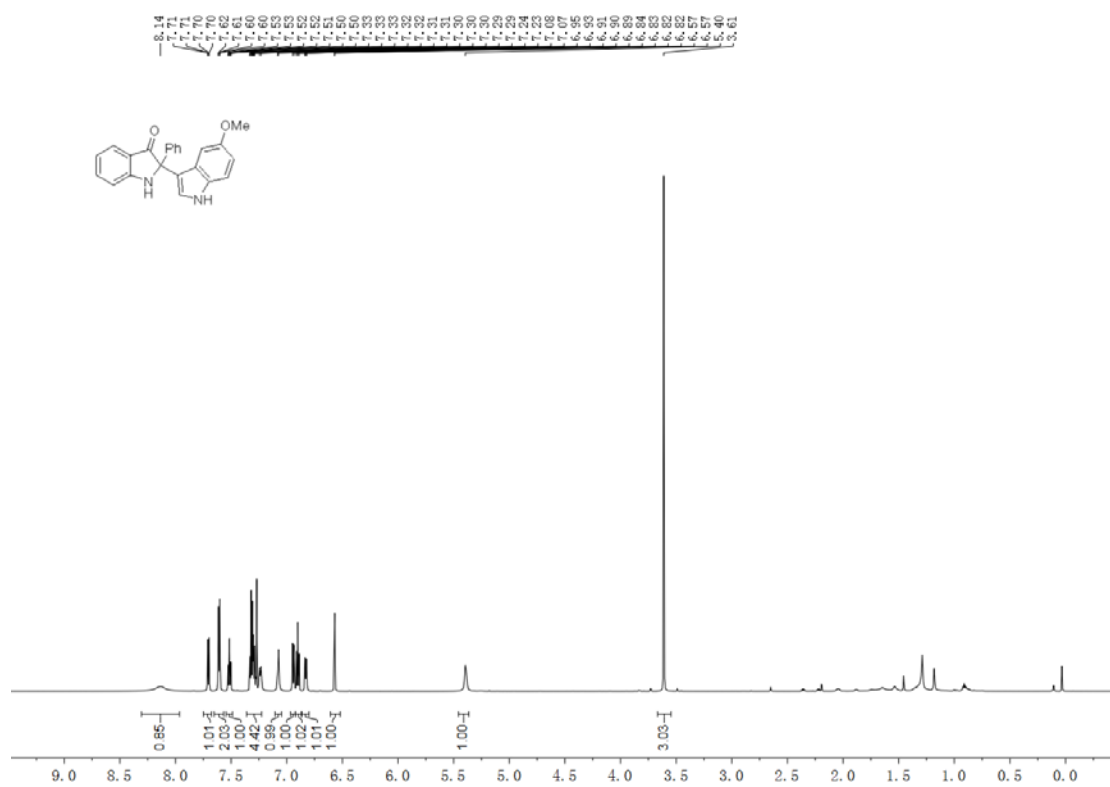

# $^{13}\text{C}$ NMR spectrum of compound 5o in $\text{CDCl}_3$ (151 MHz)

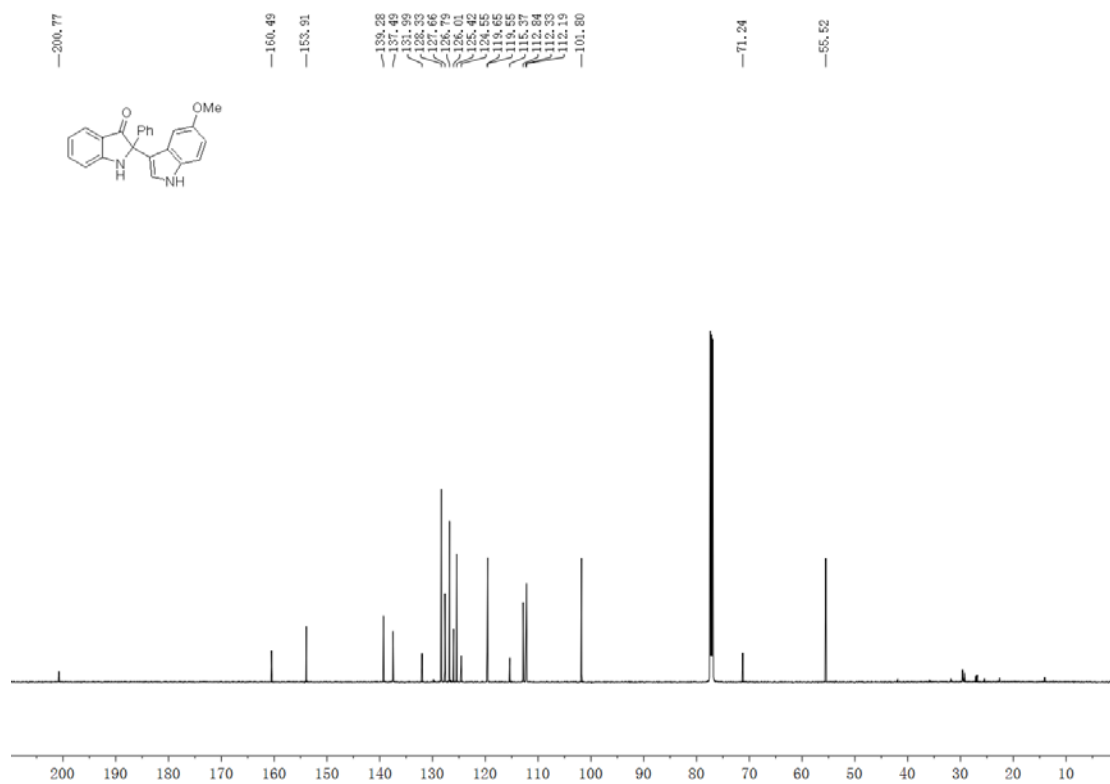

<sup>1</sup>H NMR spectrum of compound 5p in CDCl<sub>3</sub> (600 MHz)

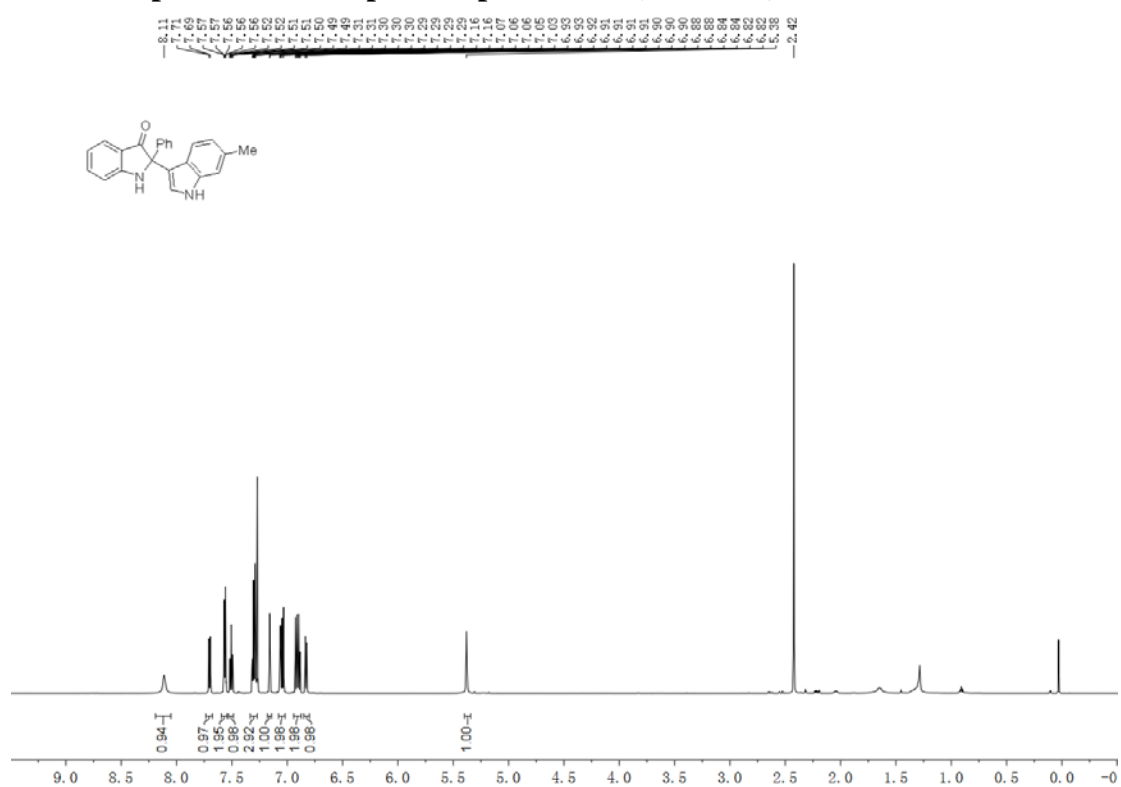

<sup>13</sup>C NMR spectrum of compound 5p in CDCl<sub>3</sub> (151 MHz)

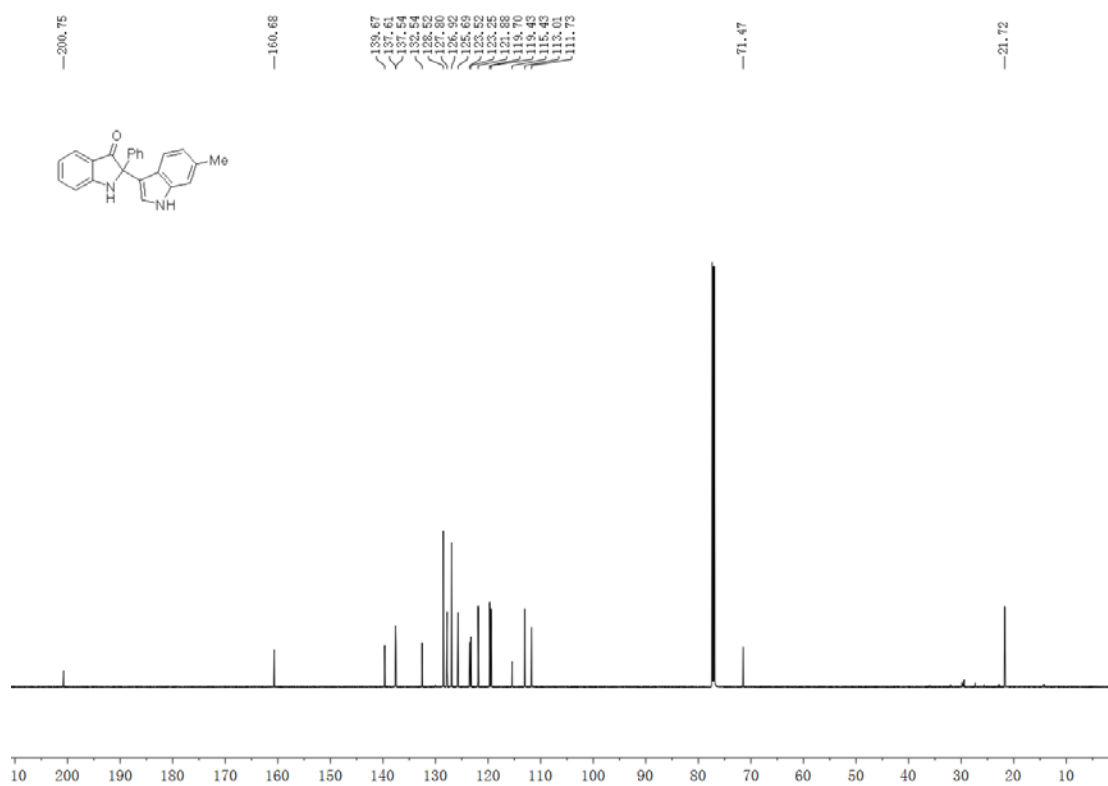

### <sup>1</sup>H NMR spectrum of compound 5q in CDCl<sub>3</sub> (600 MHz)

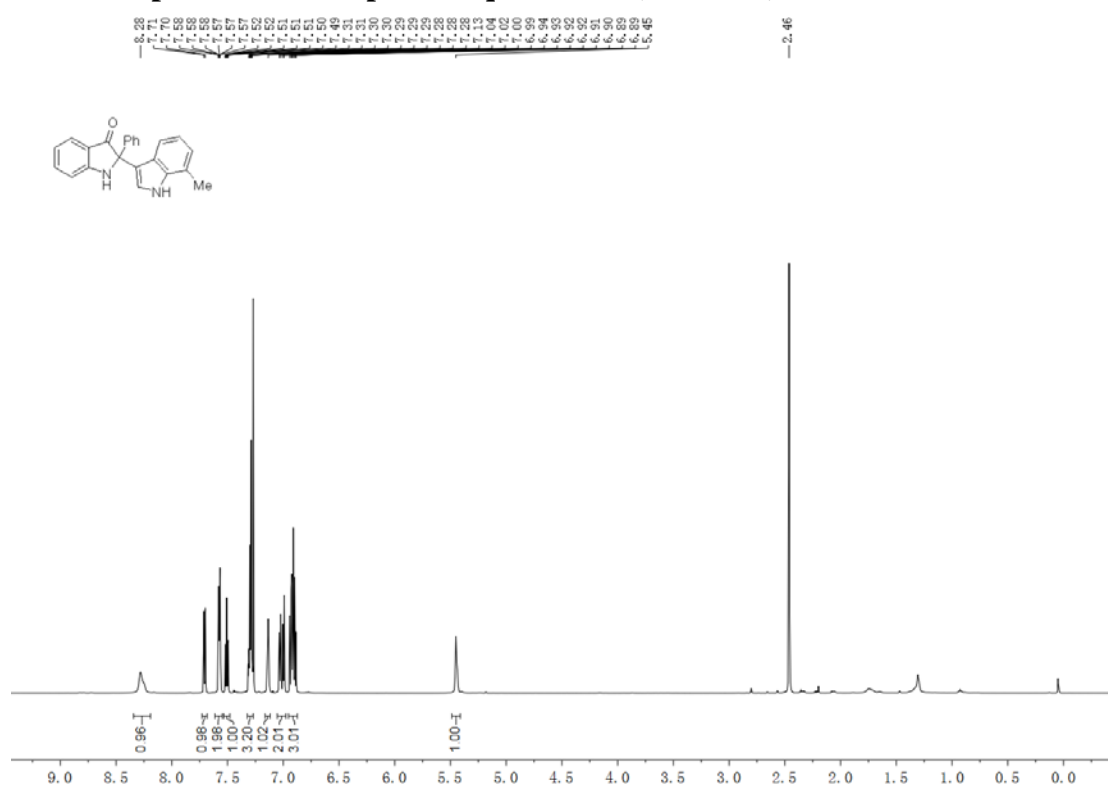

### <sup>13</sup>C NMR spectrum of compound 5q in CDCl<sub>3</sub> (151 MHz)

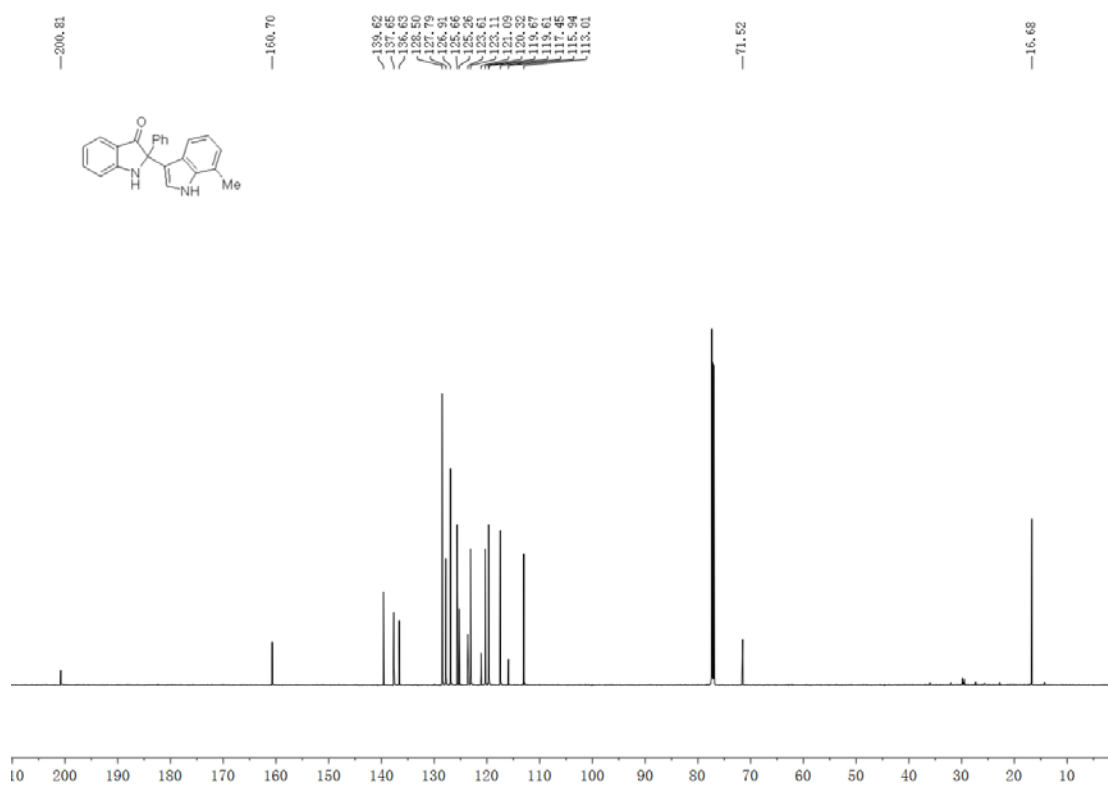



### $^1\text{H}$ NMR spectrum of compound 5s in $\text{CDCl}_3$ (600 MHz)

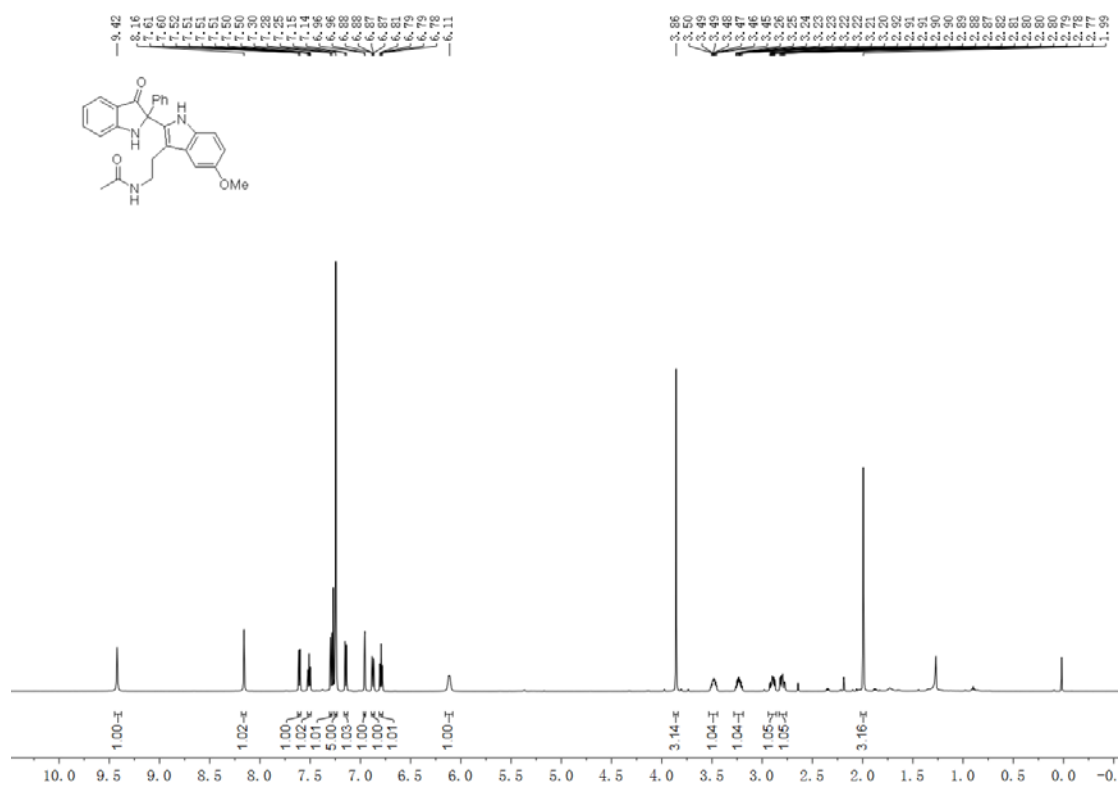

### $^{13}\text{C}$ NMR spectrum of compound 5s in $\text{CDCl}_3$ (151 MHz)

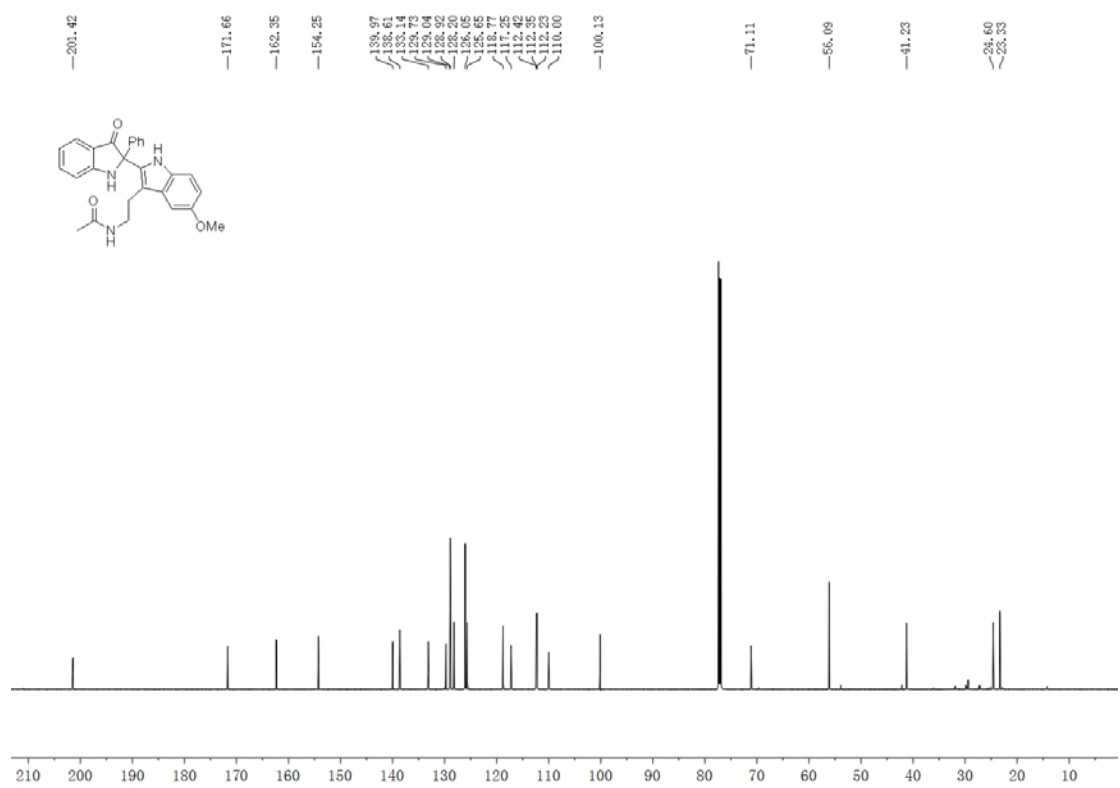

### $^1\text{H}$ NMR spectrum of compound 5t in $\text{CDCl}_3$ (600 MHz)

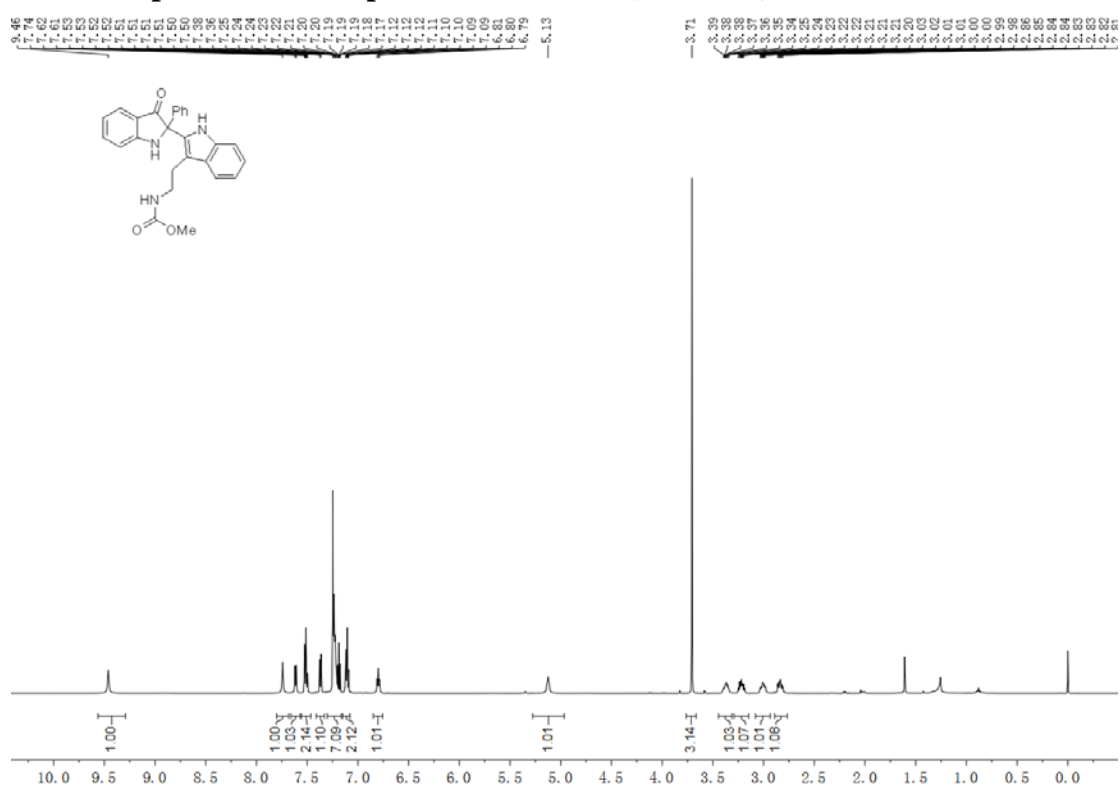

### $^{13}\text{C}$ NMR spectrum of compound 5t in $\text{CDCl}_3$ (151 MHz)

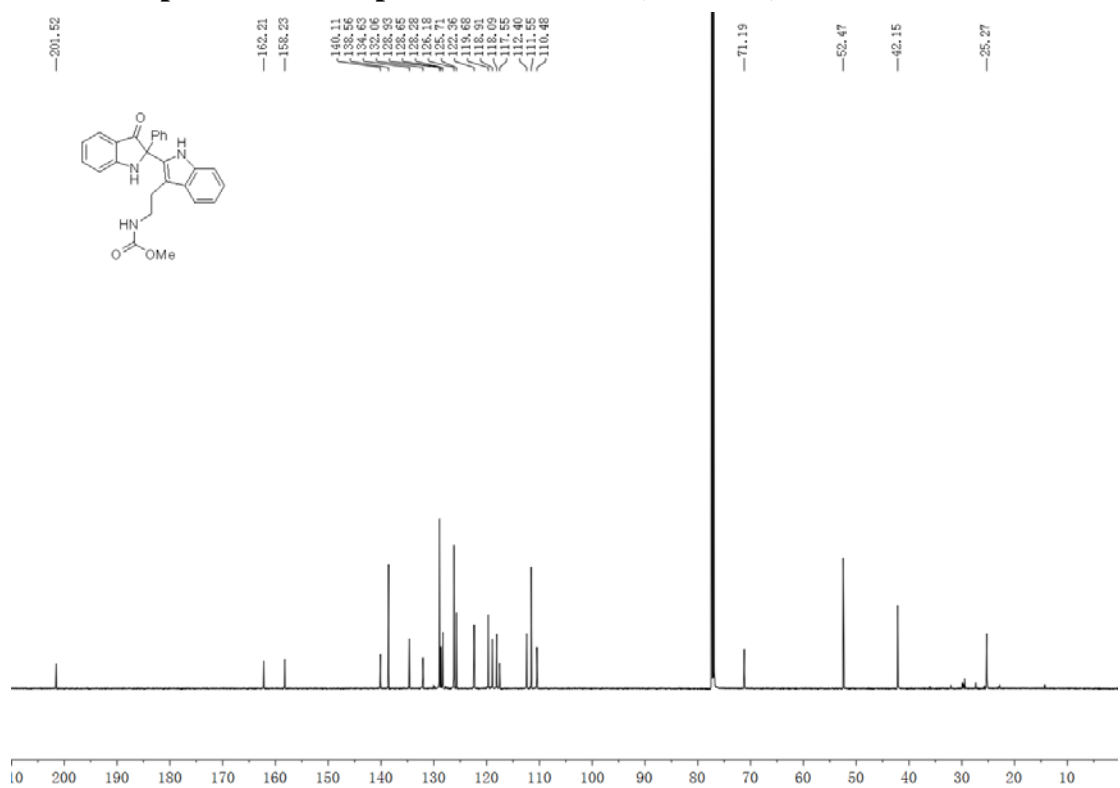

### $^1\text{H}$ NMR spectrum of compound 6a in acetone- $d_6$ (600 MHz)

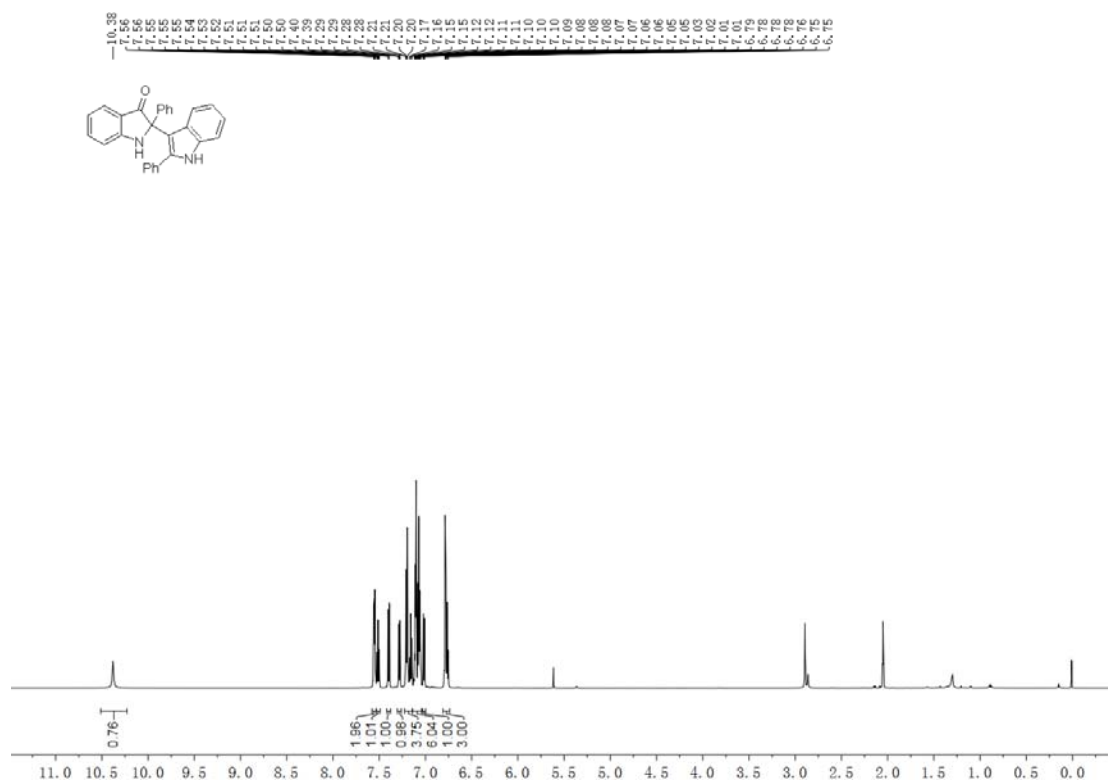

### $^{13}\text{C}$ NMR spectrum of compound 6a in acetone- $d_6$ (151 MHz)

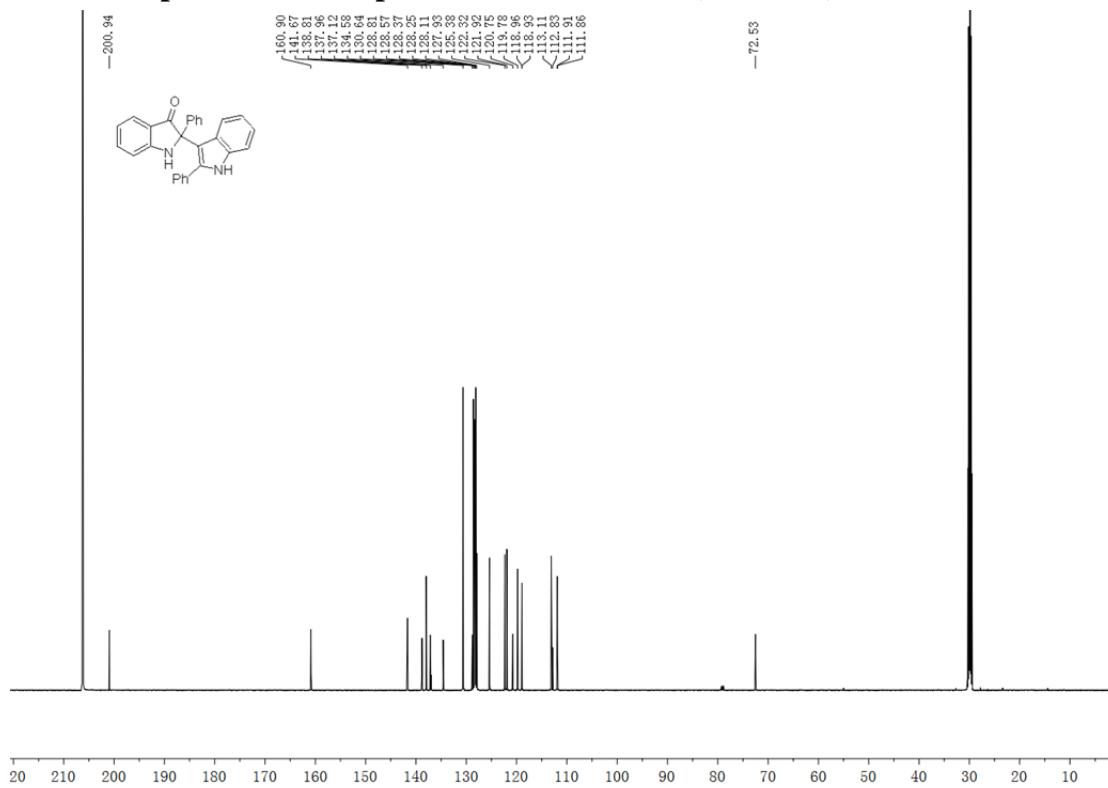

# <sup>1</sup>H NMR spectrum of compound 6b in CDCl<sub>3</sub> (600 MHz)

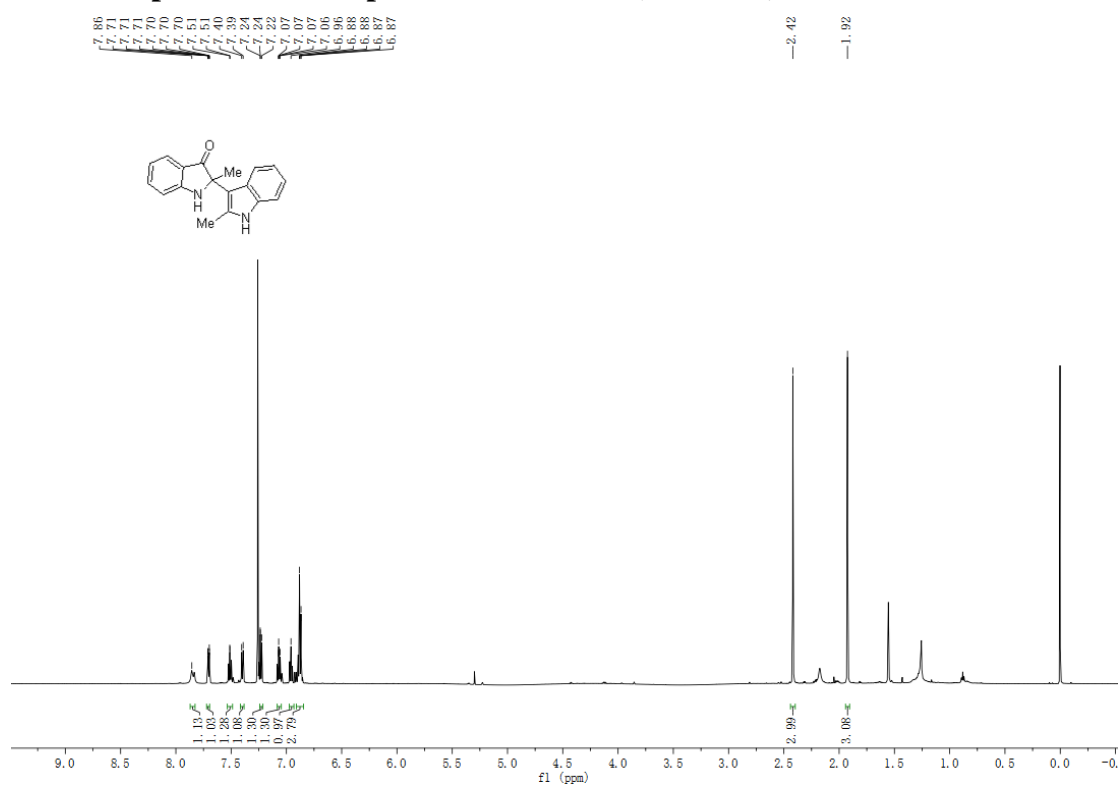

# <sup>13</sup>C NMR spectrum of compound 6b in CDCl<sub>3</sub> (151 MHz)

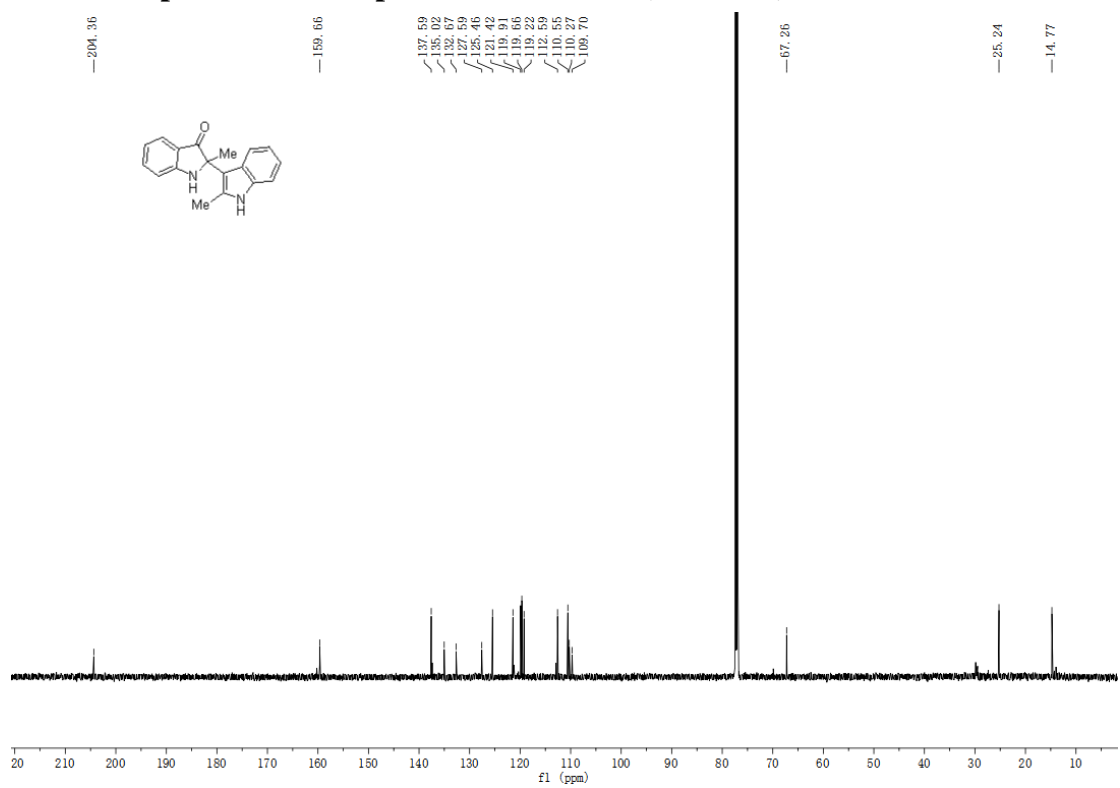



### $^1\text{H}$ NMR spectrum of compound 6c in $\text{DMSO}-d_6$ (600 MHz)

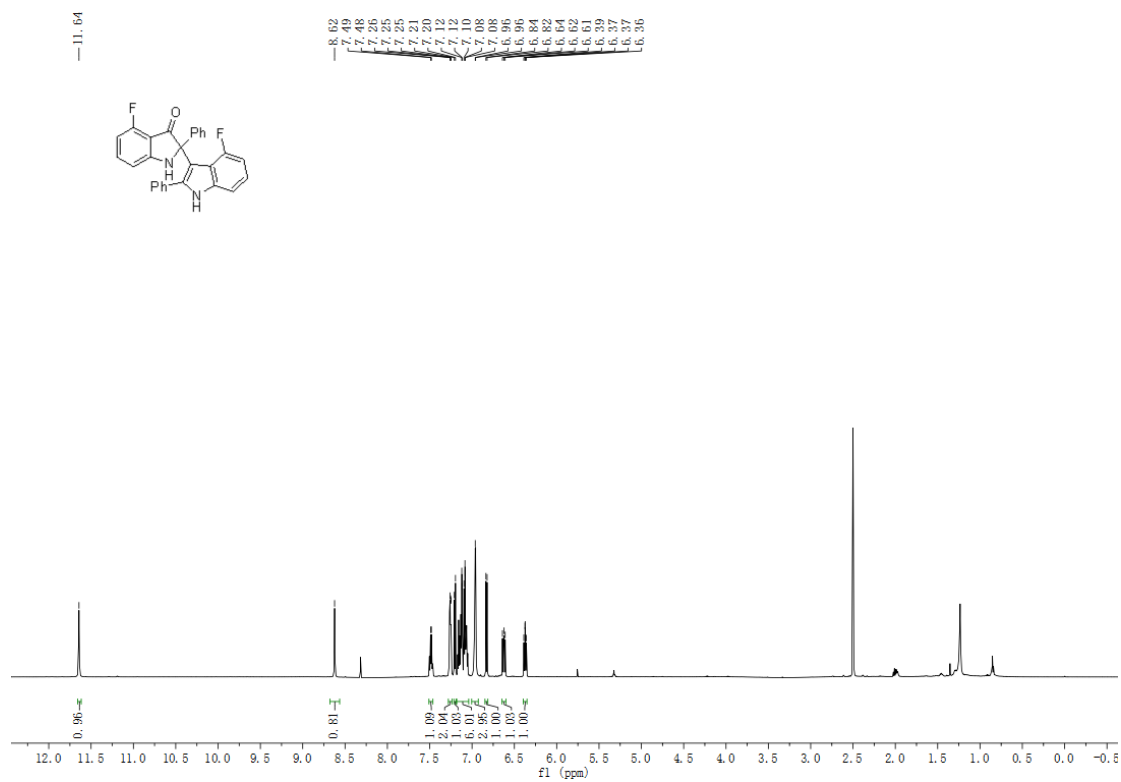

### $^{13}\text{C}$ NMR spectrum of compound 6c in $\text{DMSO}-d_6$ (151 MHz)

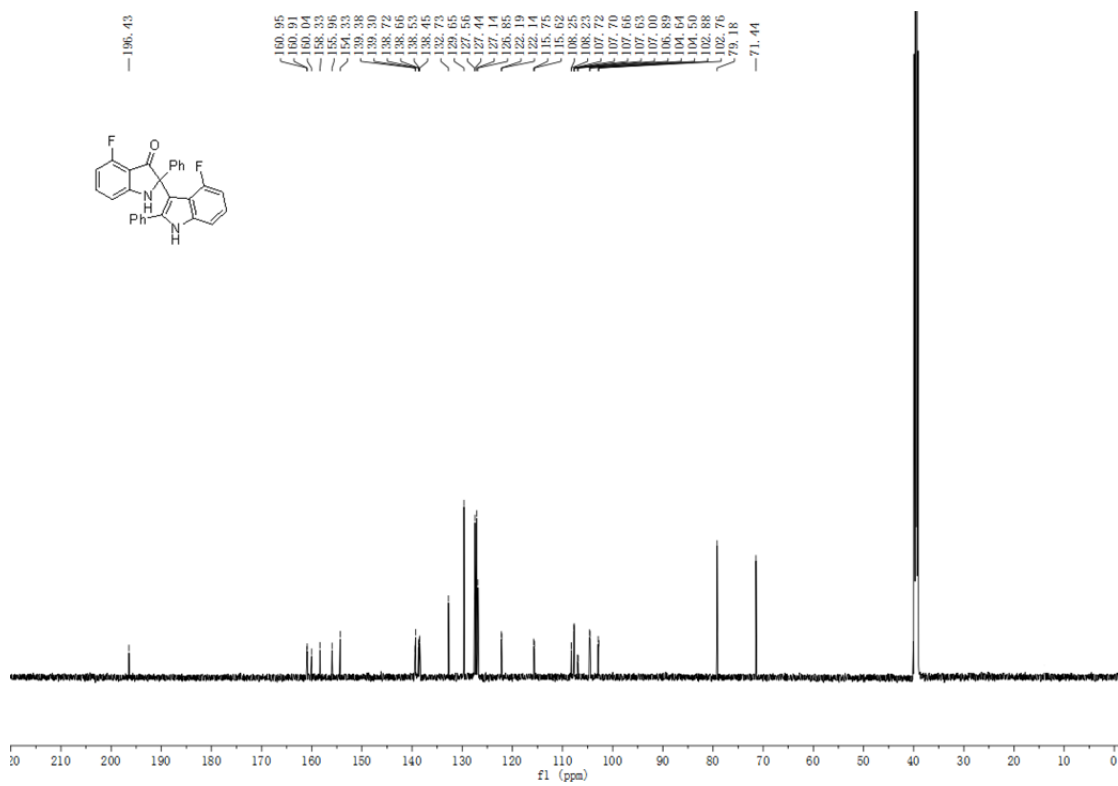

### <sup>1</sup>H NMR spectrum of compound 6d in CDCl<sub>3</sub> (600 MHz)

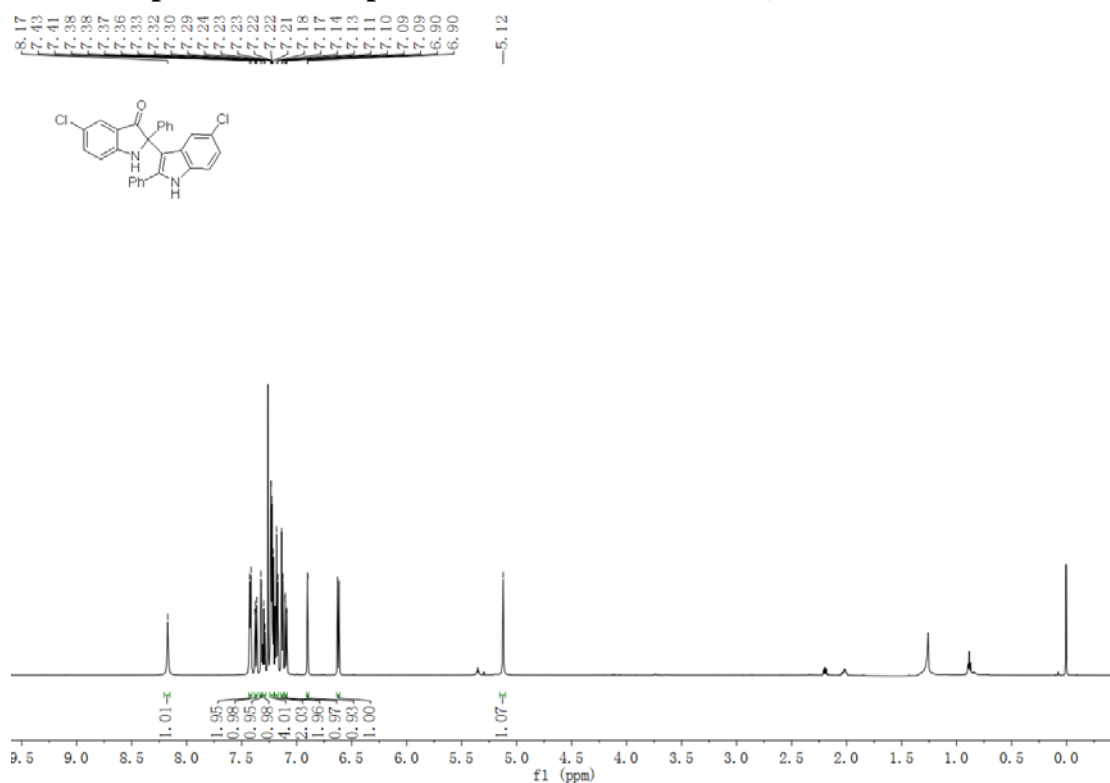

### <sup>13</sup>C NMR spectrum of compound 6d in CDCl<sub>3</sub> (151 MHz)

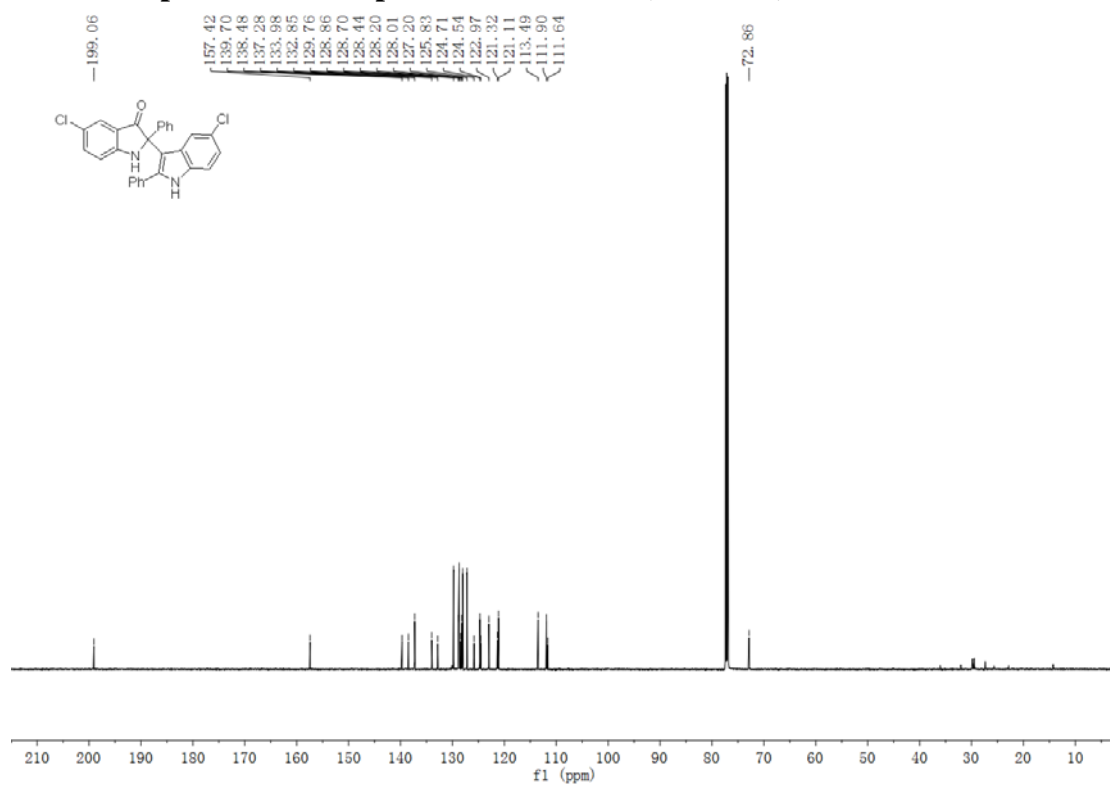

### <sup>1</sup>H NMR spectrum of compound 6e in CDCl<sub>3</sub> (600 MHz)

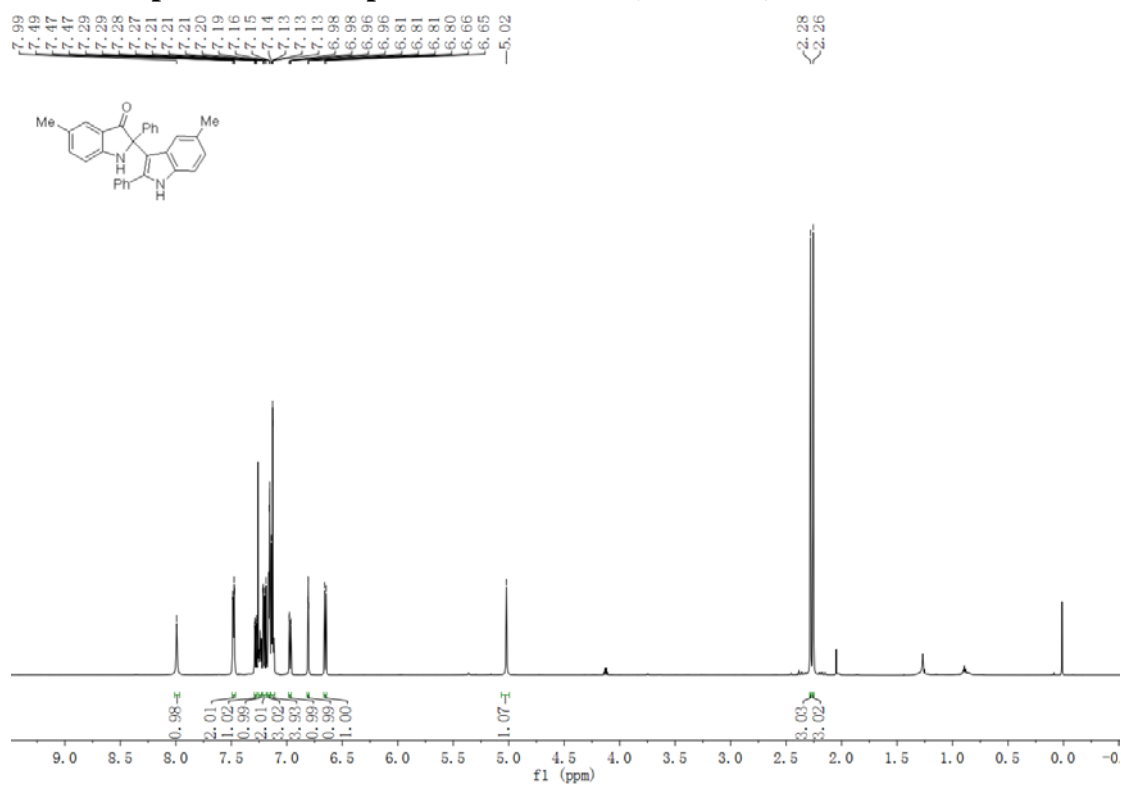

### <sup>13</sup>C NMR spectrum of compound 6e in CDCl<sub>3</sub> (151 MHz)

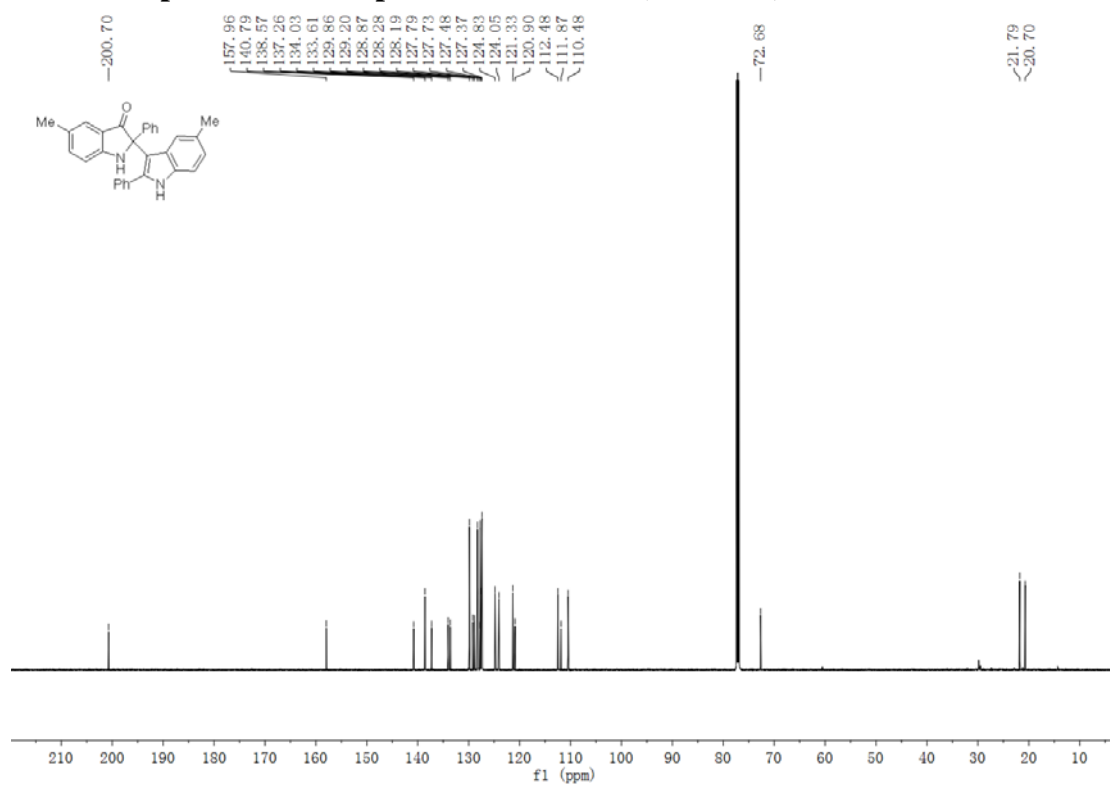

### <sup>1</sup>H NMR spectrum of compound 6f in CDCl<sub>3</sub> (600 MHz)

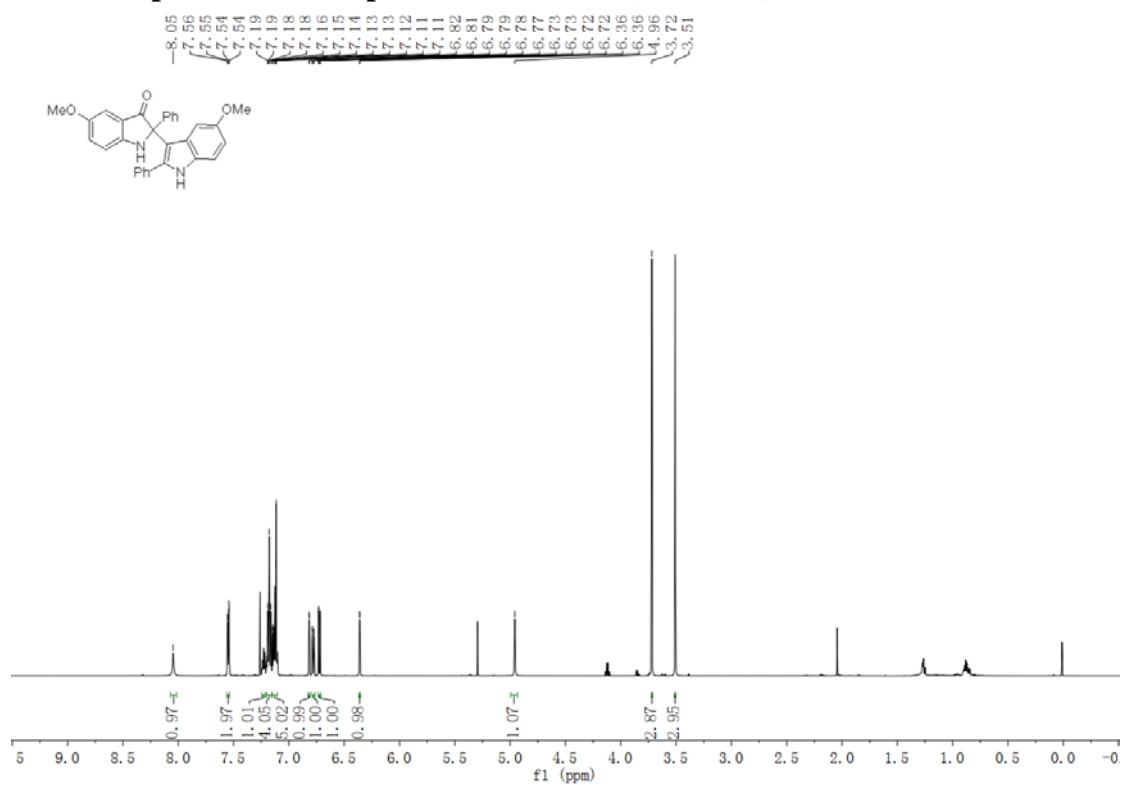

### <sup>13</sup>C NMR spectrum of compound 6f in CDCl<sub>3</sub> (151 MHz)

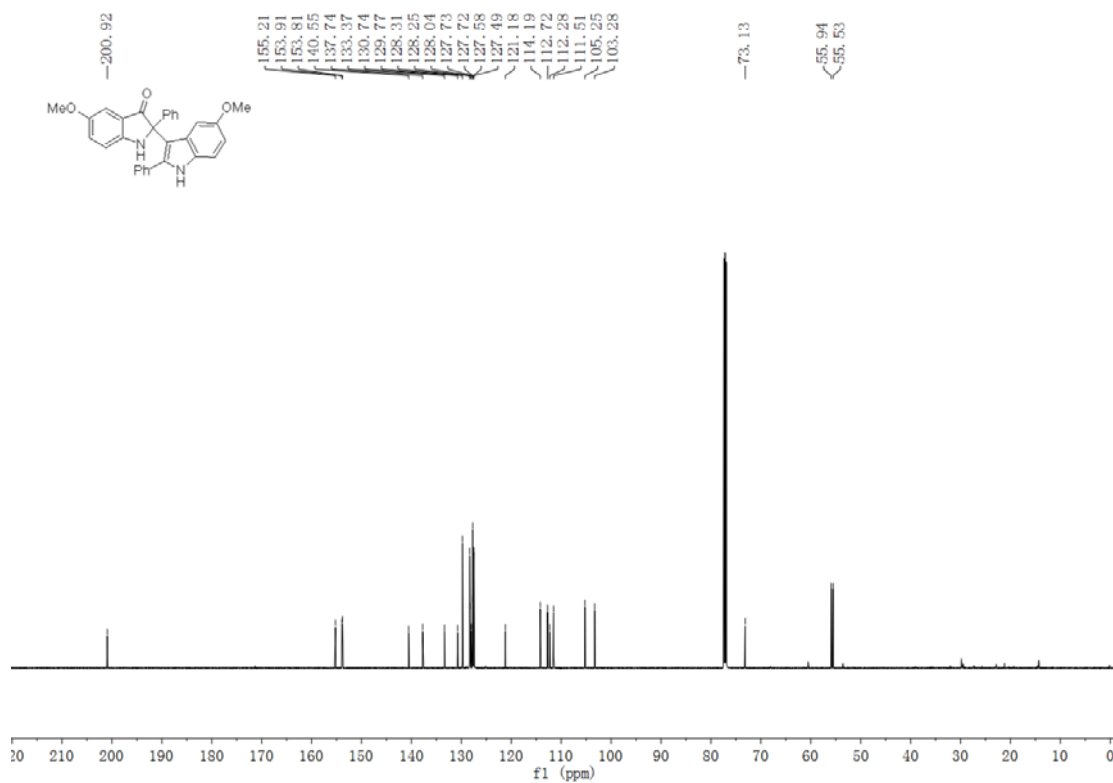

### $^1\text{H}$ NMR spectrum of compound **6g** in acetone- $d_6$ (600 MHz)

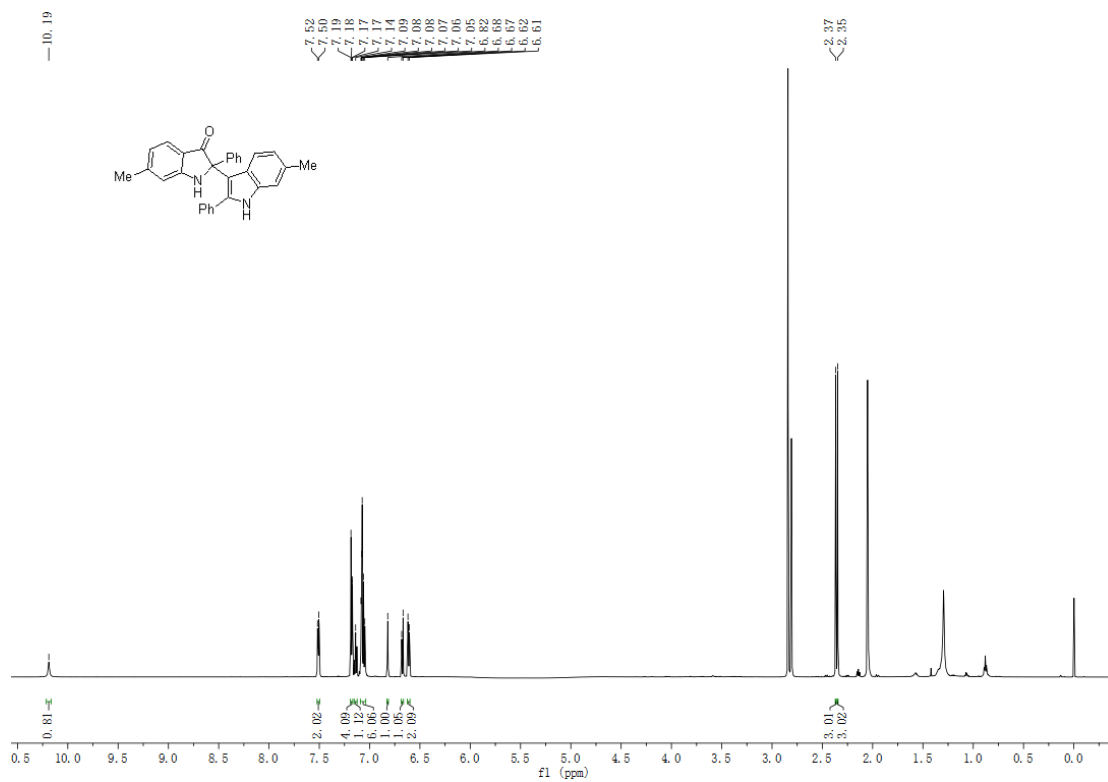

### $^{13}\text{C}$ NMR spectrum of compound **6g** in acetone- $d_6$ (151 MHz)

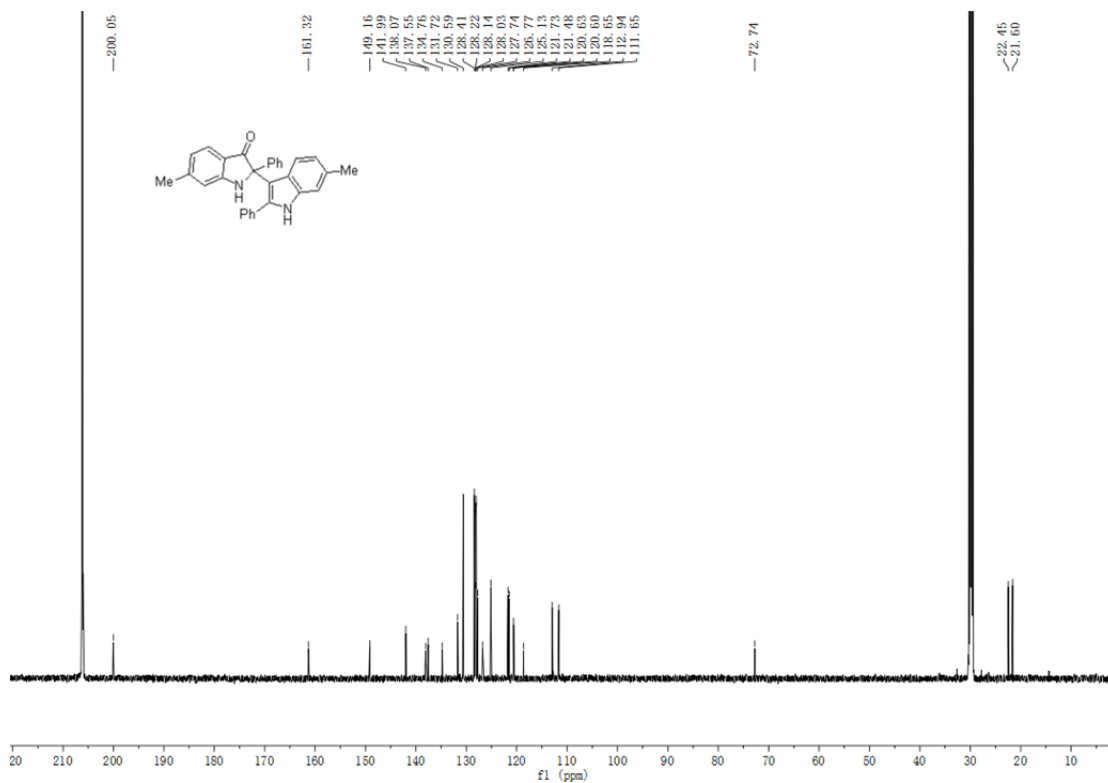

### <sup>1</sup>H NMR spectrum of compound 6h in CDCl<sub>3</sub> (600 MHz)

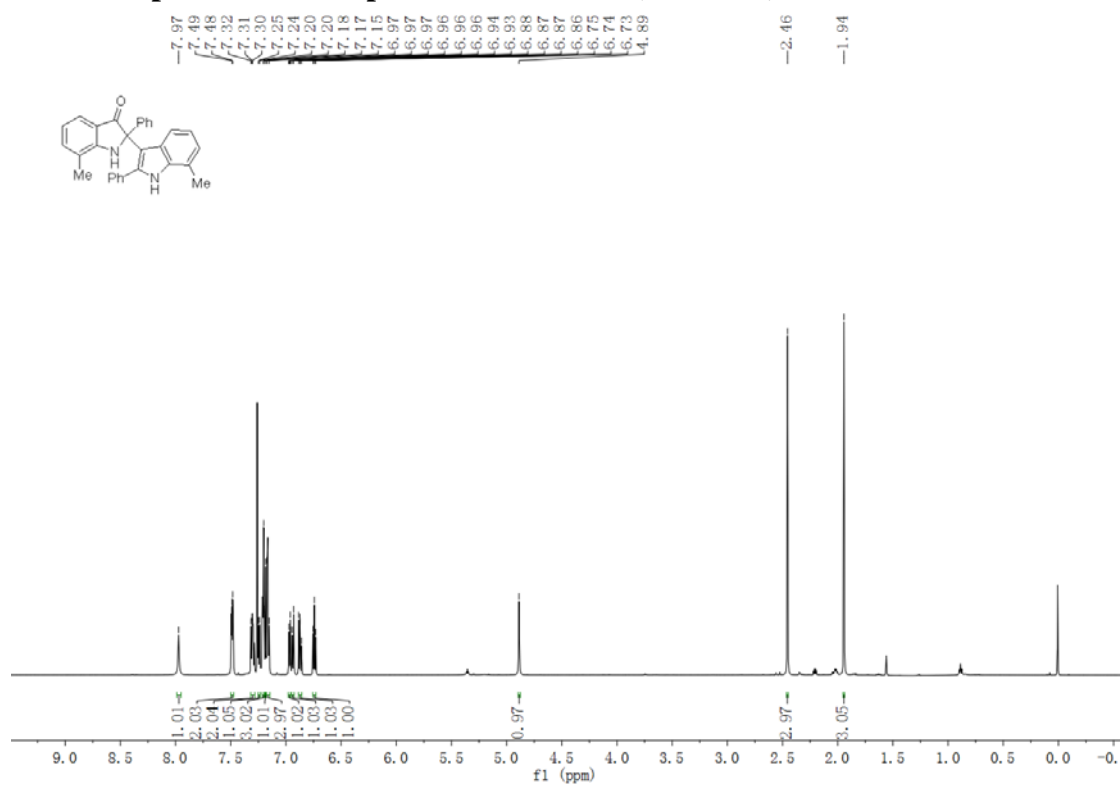

### <sup>13</sup>C NMR spectrum of compound 6h in CDCl<sub>3</sub> (151 MHz)

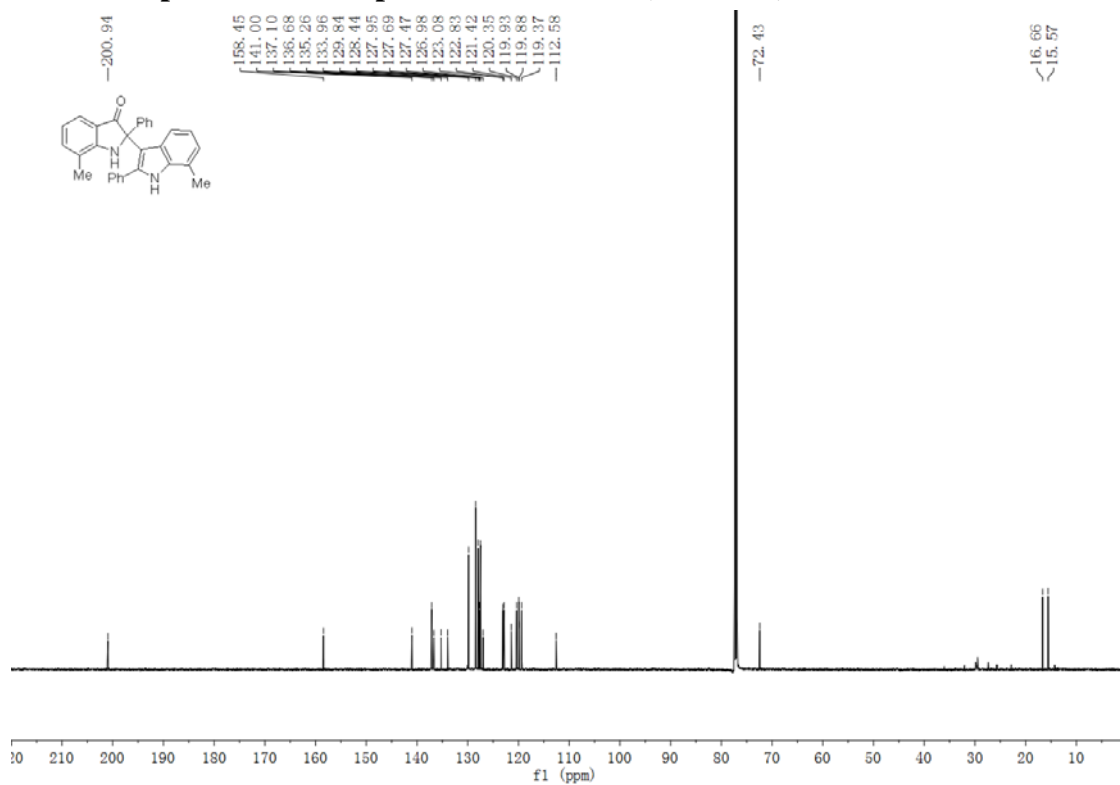

**$^1\text{H}$  NMR spectrum of compound 7a in acetone- $d_6$  (600 MHz)**

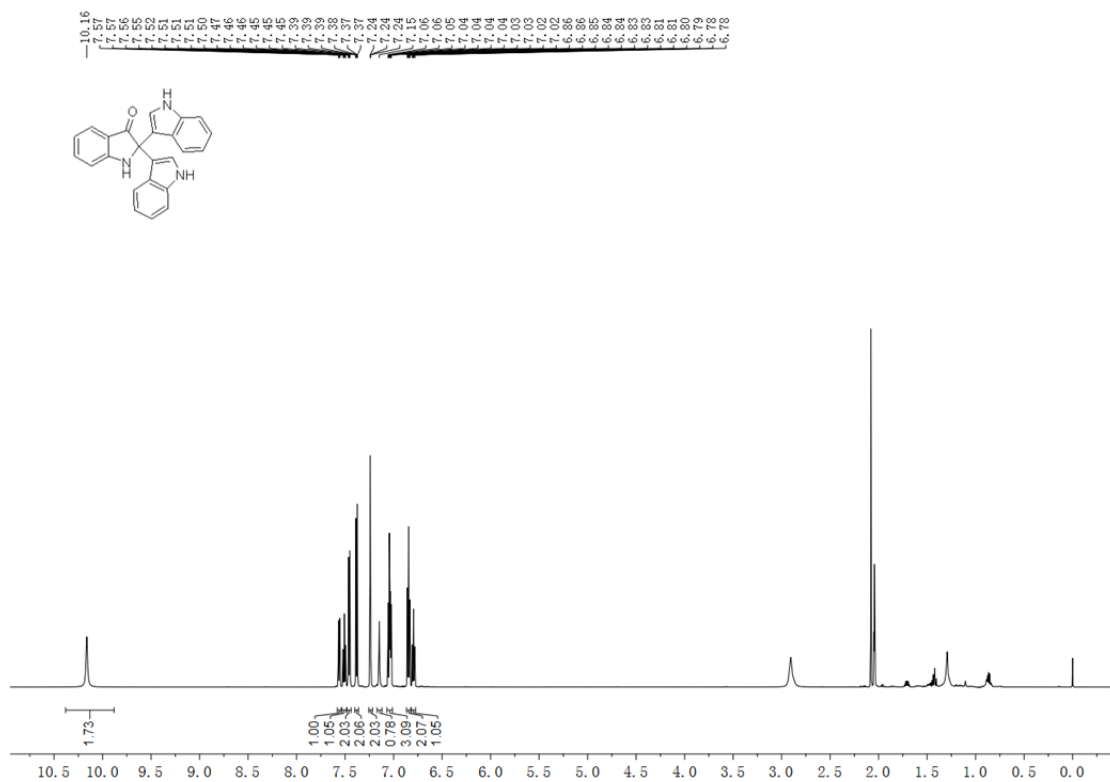

**$^{13}\text{C}$  NMR spectrum of compound 7a in acetone- $d_6$  (151 MHz)**

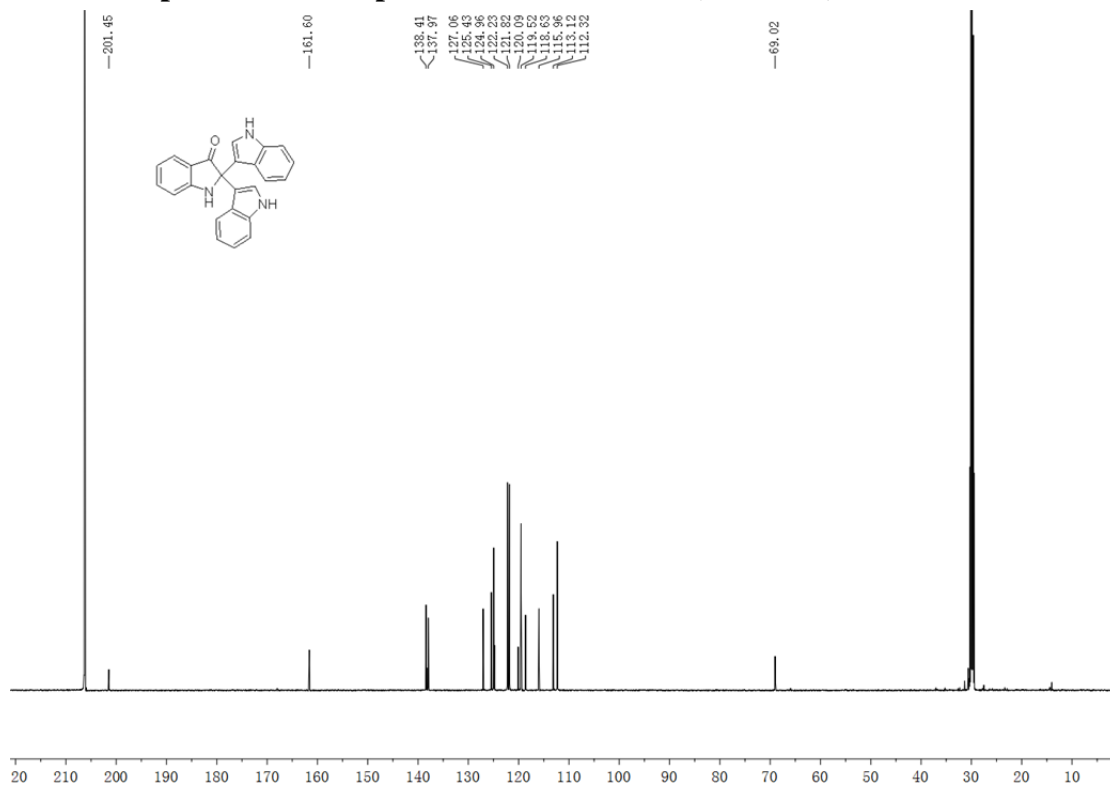

### $^1\text{H}$ NMR spectrum of compound 7b in $\text{DMSO-}d_6$ (600 MHz)

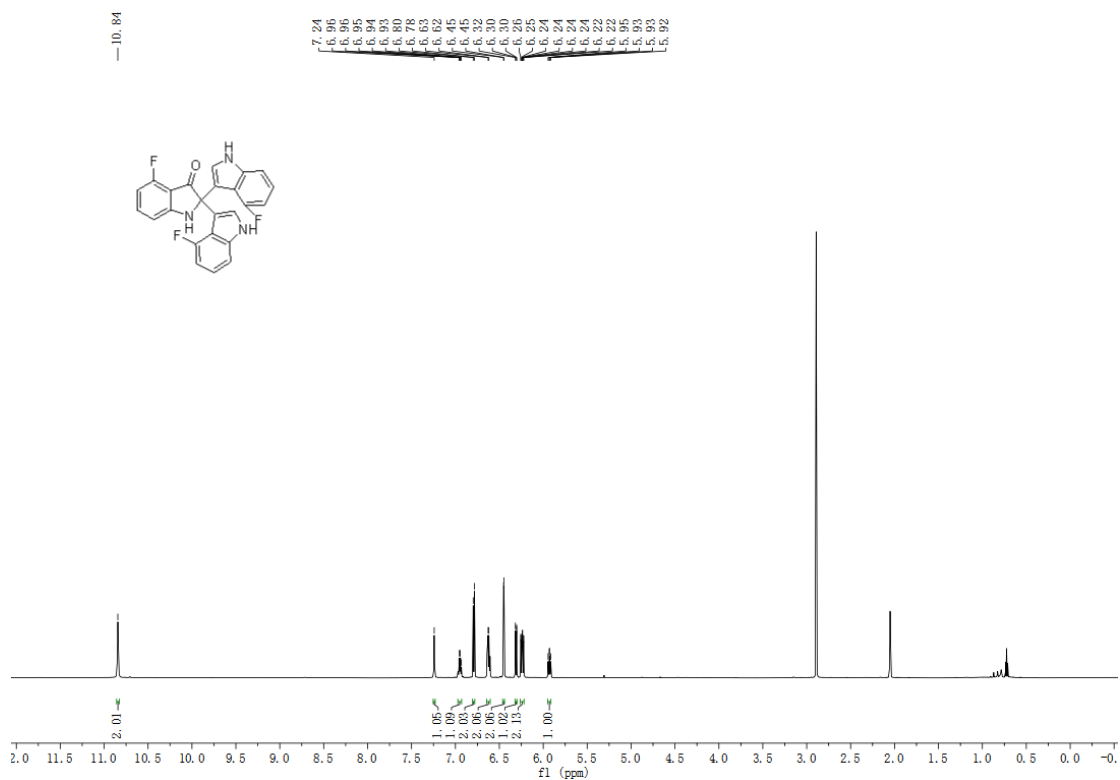

### $^{13}\text{C}$ NMR spectrum of compound 7b in $\text{DMSO-}d_6$ (151 MHz)

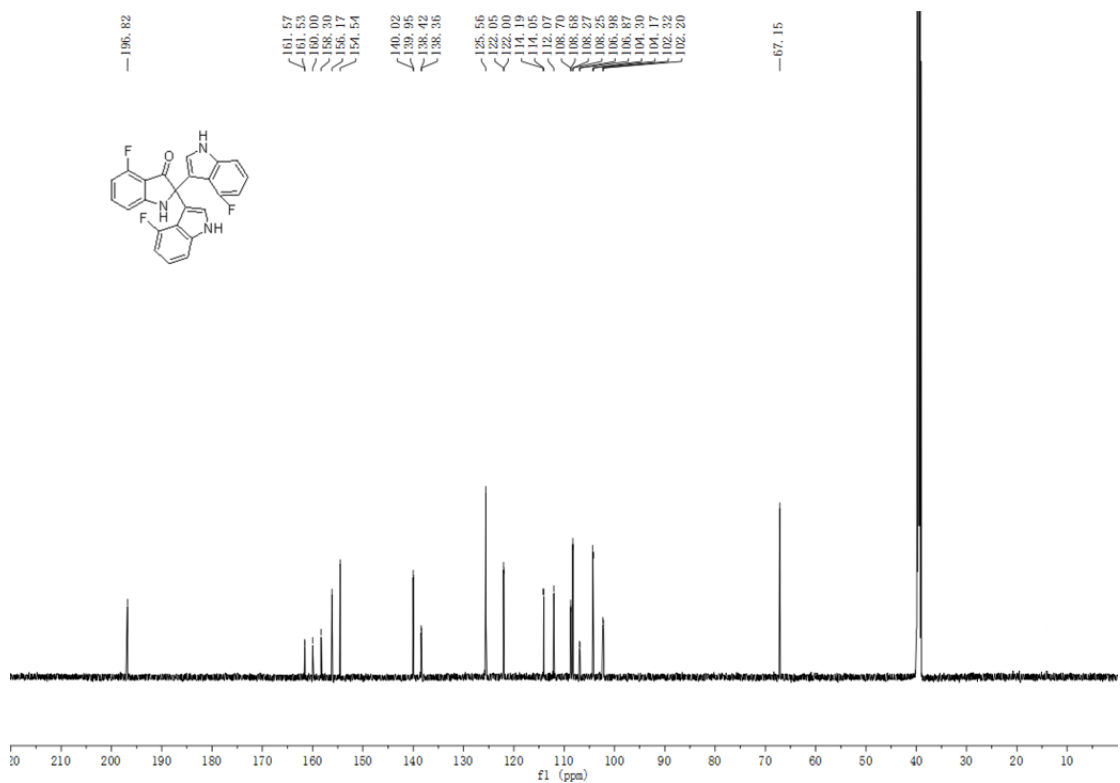



### <sup>1</sup>H NMR spectrum of compound 7c in CDCl<sub>3</sub> (600 MHz)

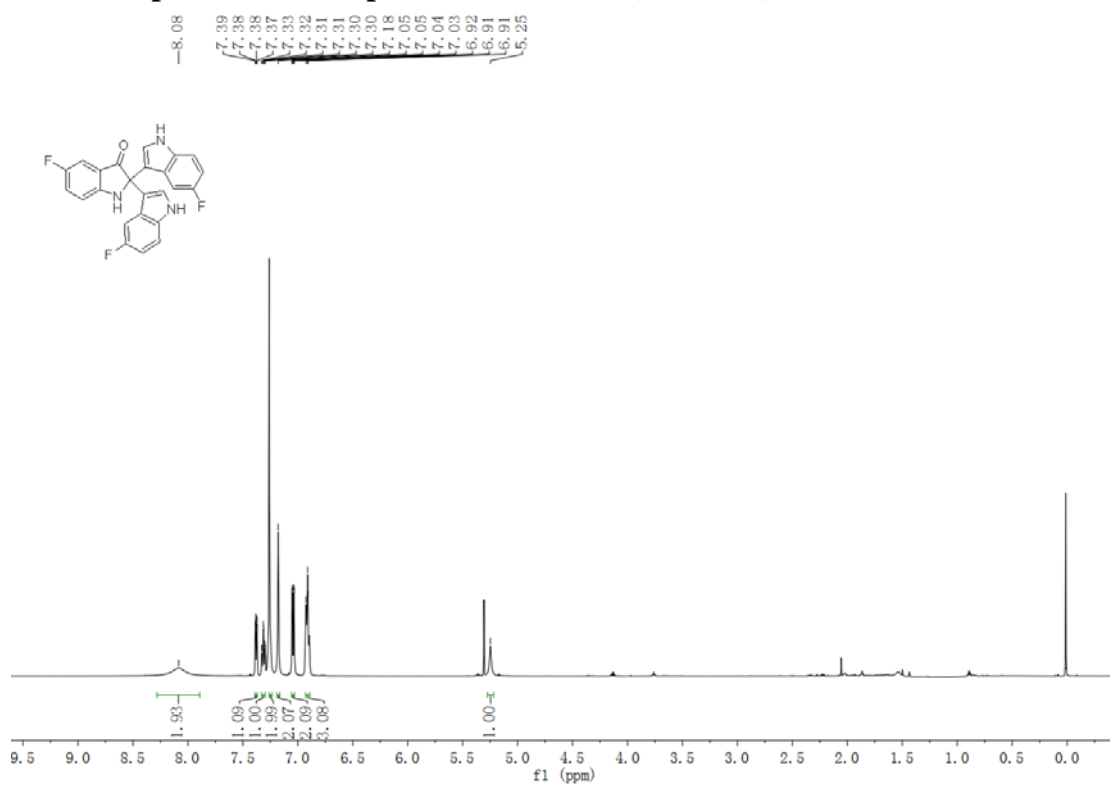

### <sup>13</sup>C NMR spectrum of compound 7c in CDCl<sub>3</sub> (151 MHz)

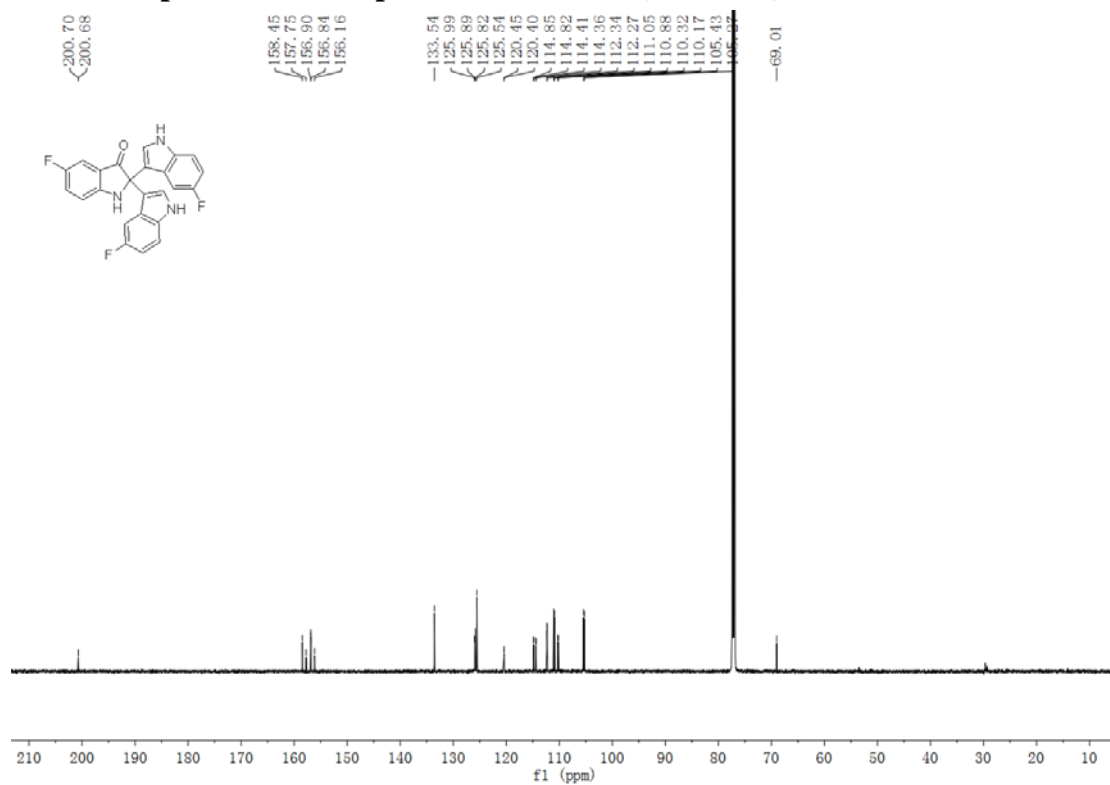

**<sup>1</sup>H NMR spectrum of compound 7d in acetone-*d*<sub>6</sub> (600 MHz)**

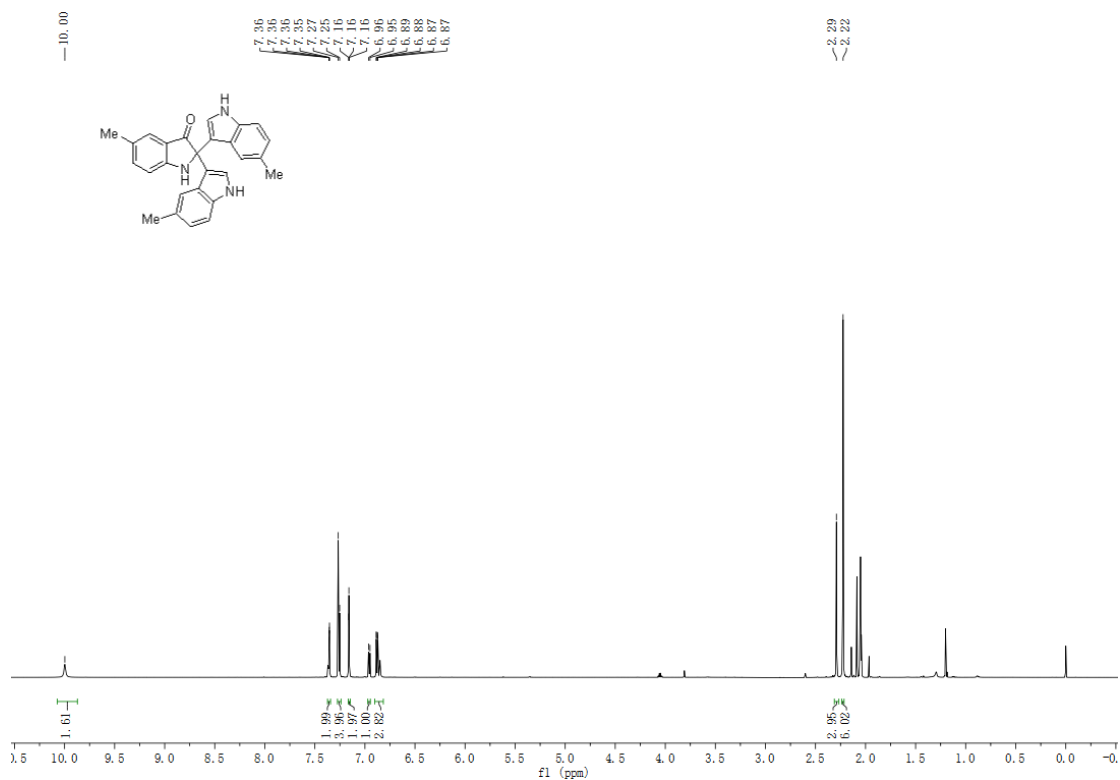

**<sup>13</sup>C NMR spectrum of compound 7d in acetone-*d*<sub>6</sub> (151 MHz)**

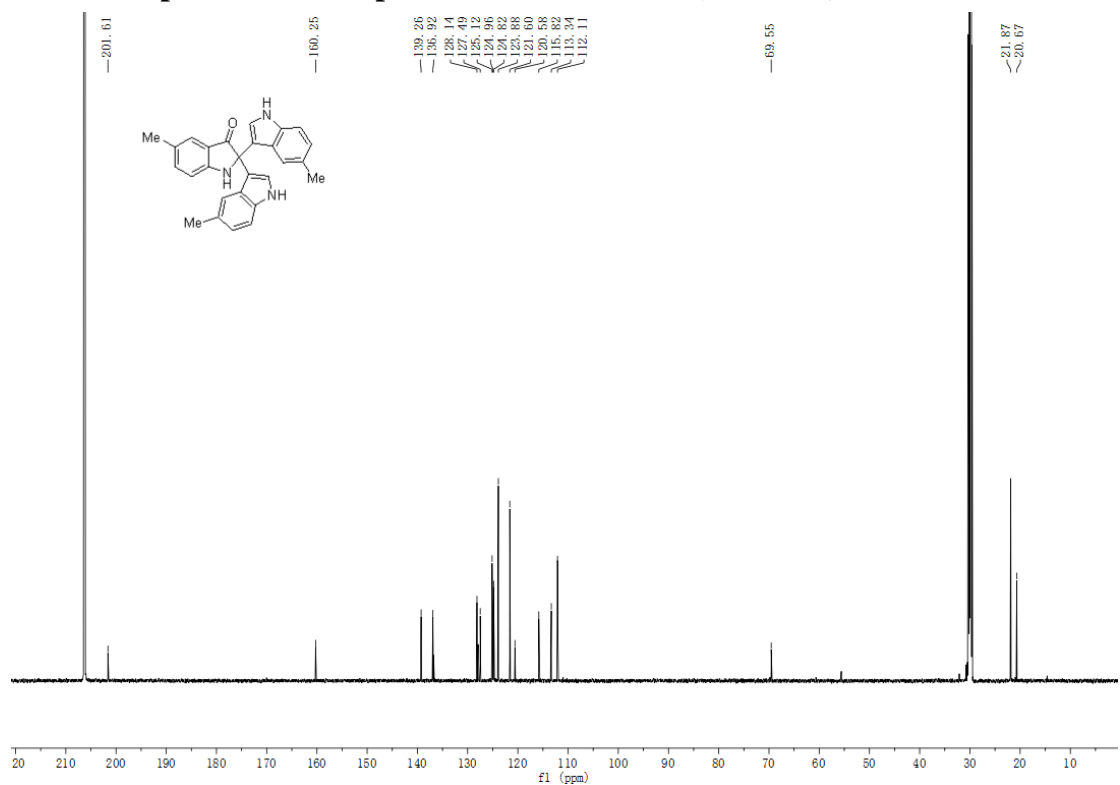

### $^1\text{H}$ NMR spectrum of compound **7e** in $\text{DMSO-}d_6$ (600 MHz)

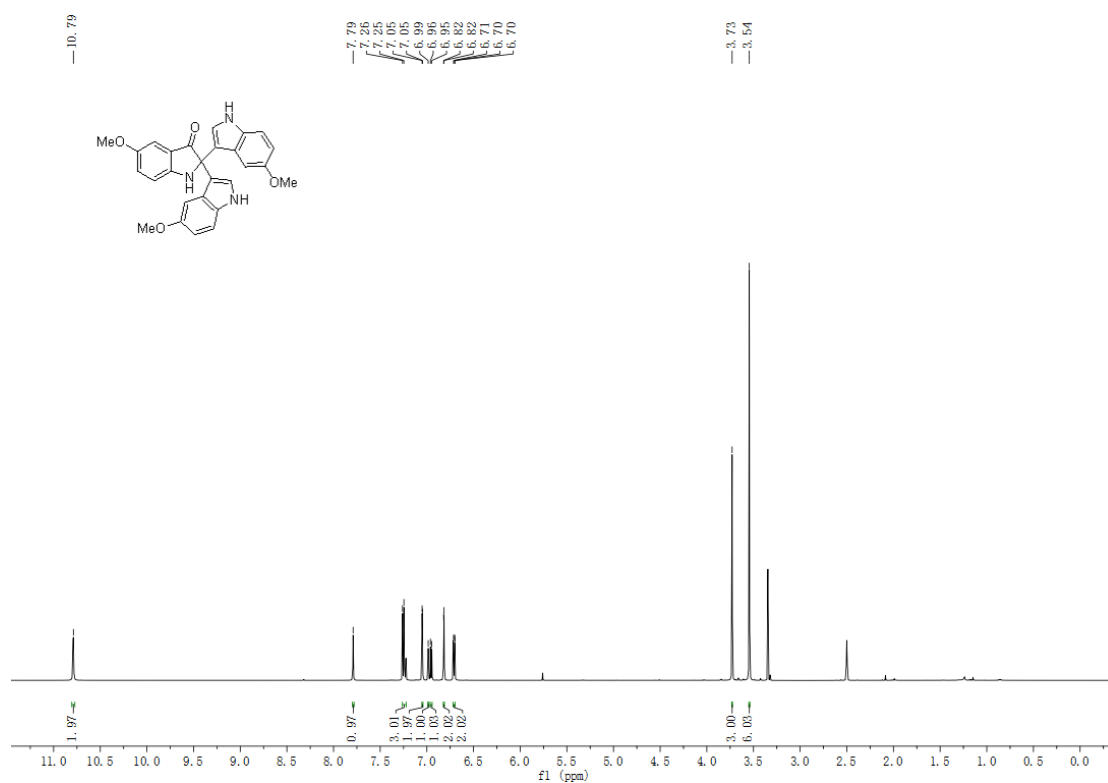

### $^{13}\text{C}$ NMR spectrum of compound **7e** in $\text{DMSO-}d_6$ (151 MHz)

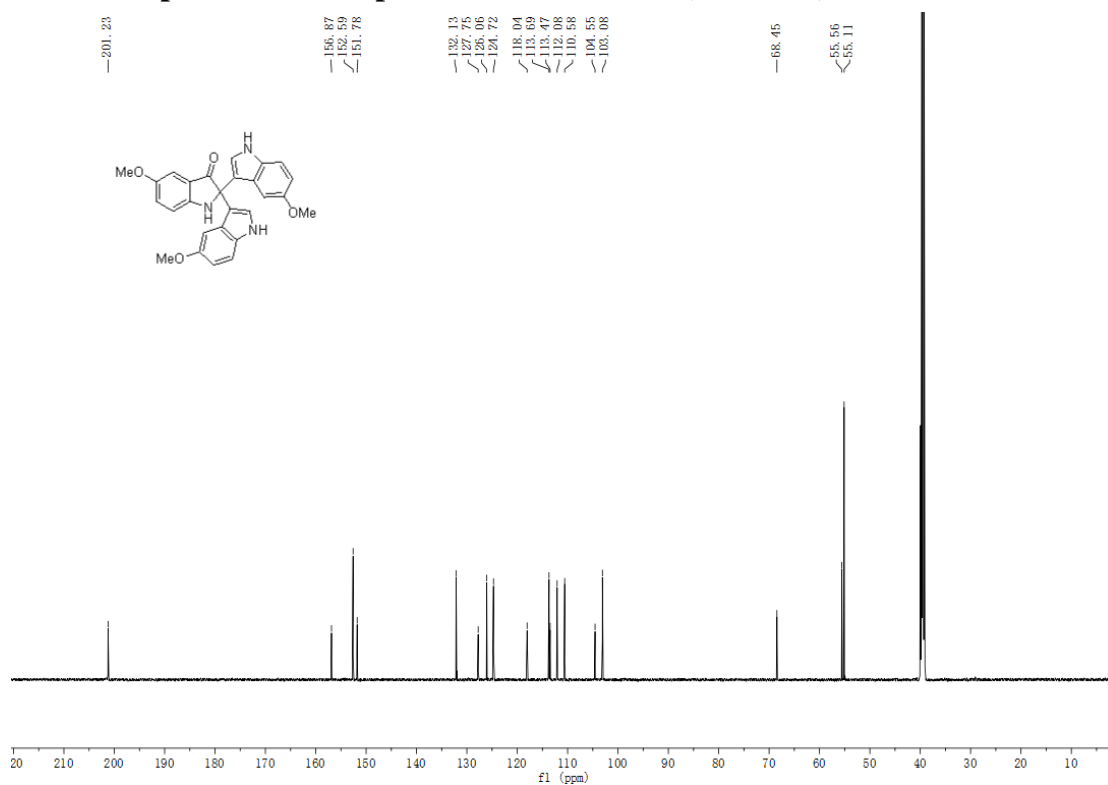

**<sup>1</sup>H NMR spectrum of compound 7f in acetone-d<sub>6</sub> (600 MHz)**

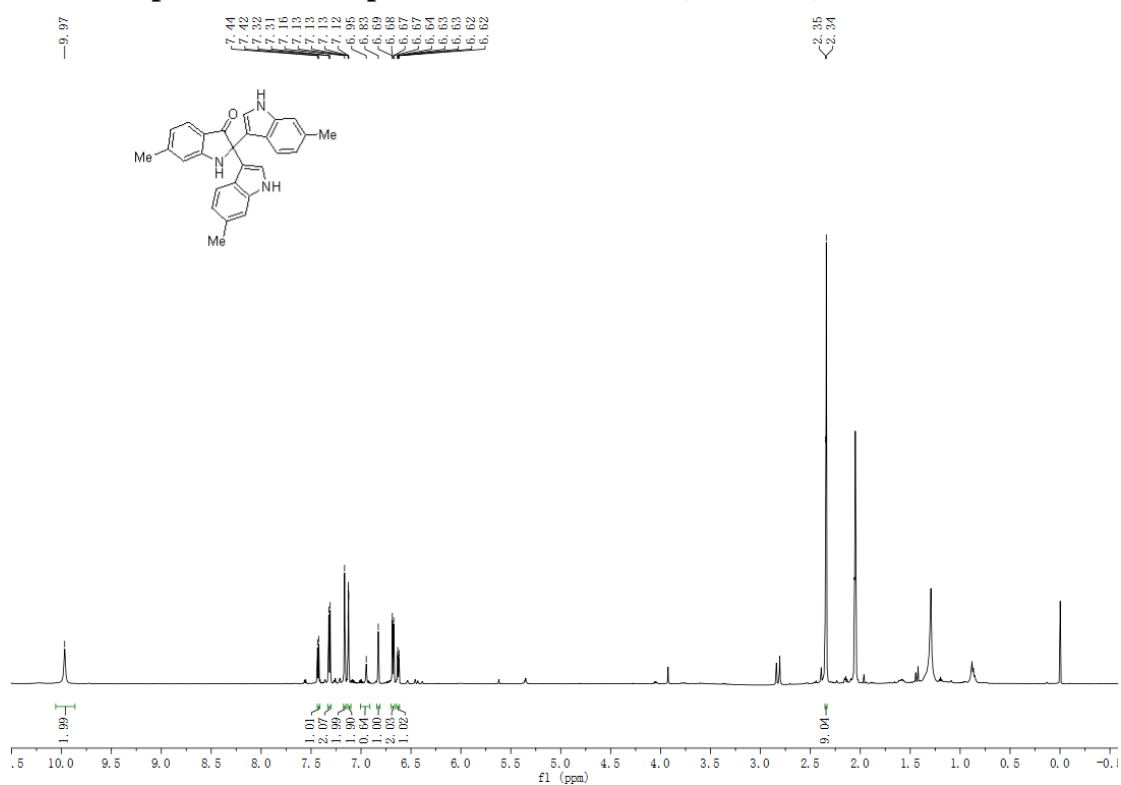

**<sup>13</sup>C NMR spectrum of compound 7f in acetone-d<sub>6</sub> (151 MHz)**

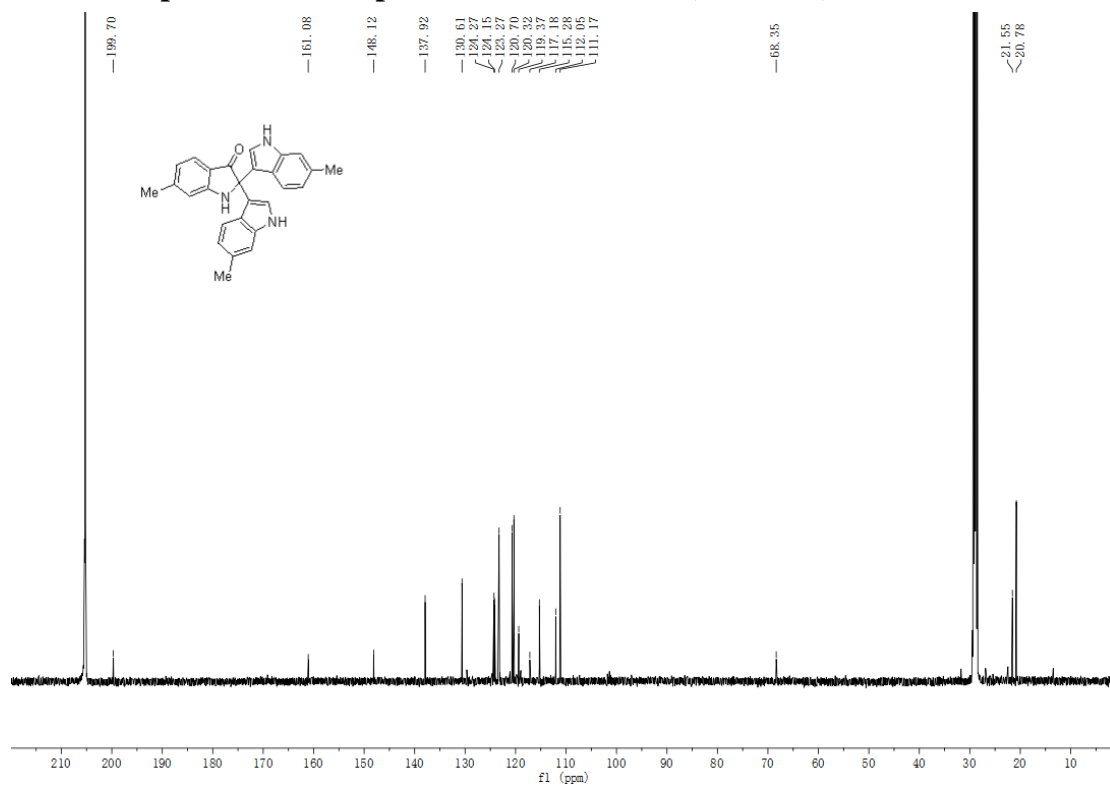

**<sup>1</sup>H NMR spectrum of compound 7g in acetone-*d*<sub>6</sub> (600 MHz)**

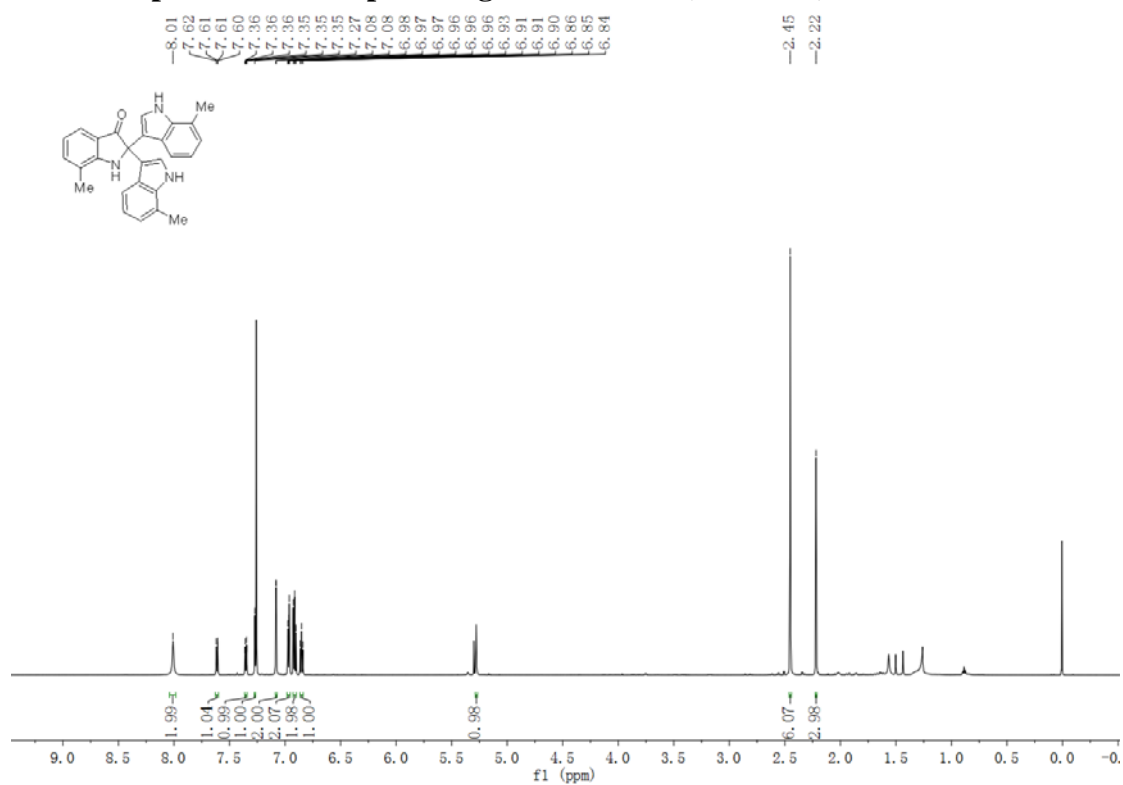

**<sup>13</sup>C NMR spectrum of compound 7g in acetone-*d*<sub>6</sub> (151 MHz)**

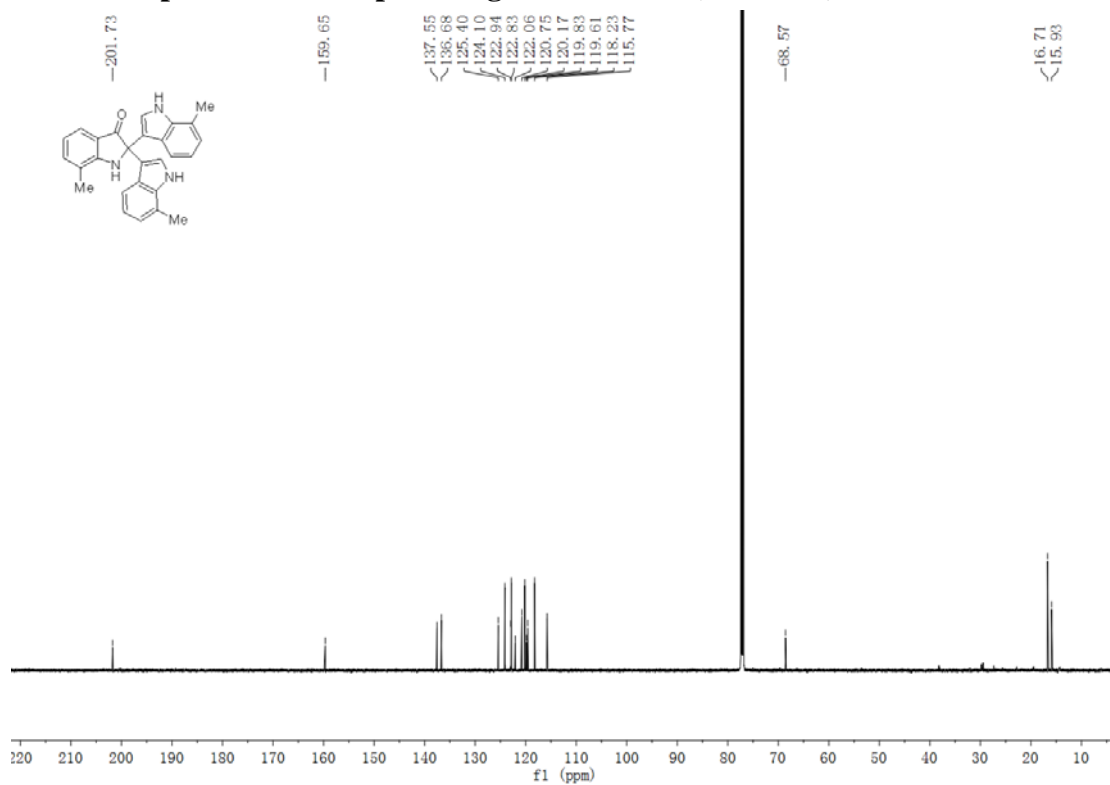

### <sup>1</sup>H NMR spectrum of compound 8 in CDCl<sub>3</sub> (600 MHz)

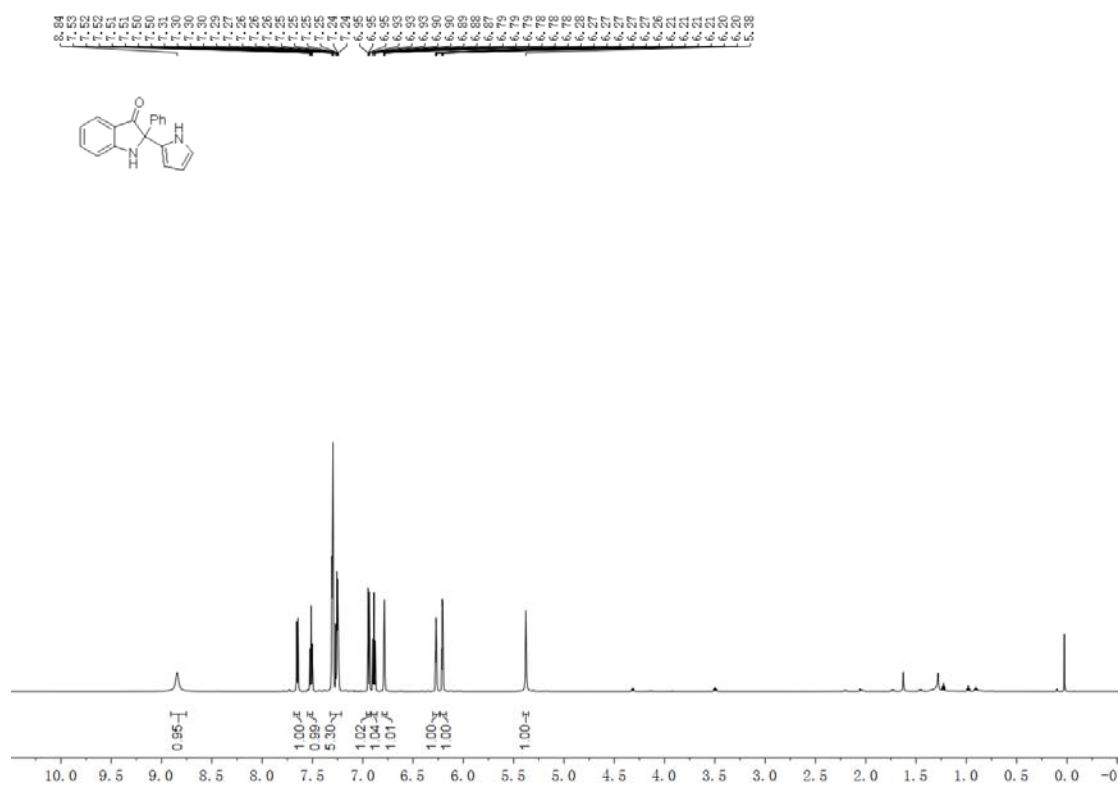

### <sup>13</sup>C NMR spectrum of compound 8 in CDCl<sub>3</sub> (151 MHz)

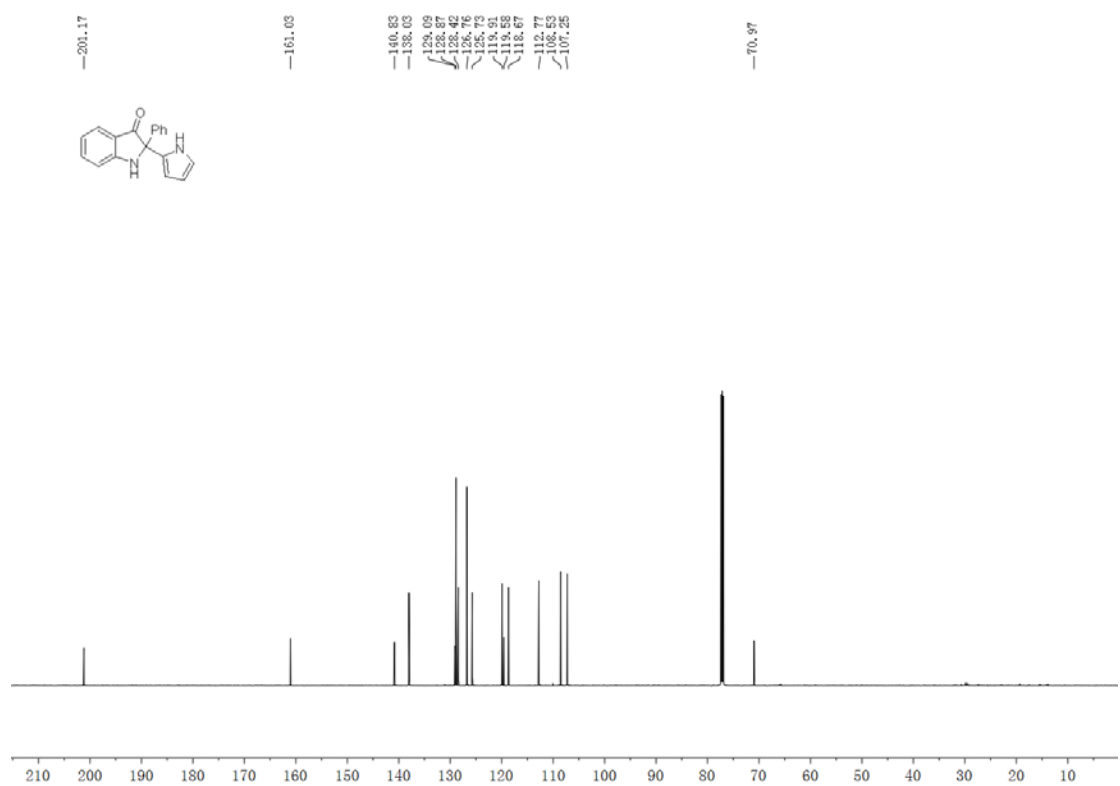

### <sup>1</sup>H NMR spectrum of compound 9 in CDCl<sub>3</sub> (600 MHz)

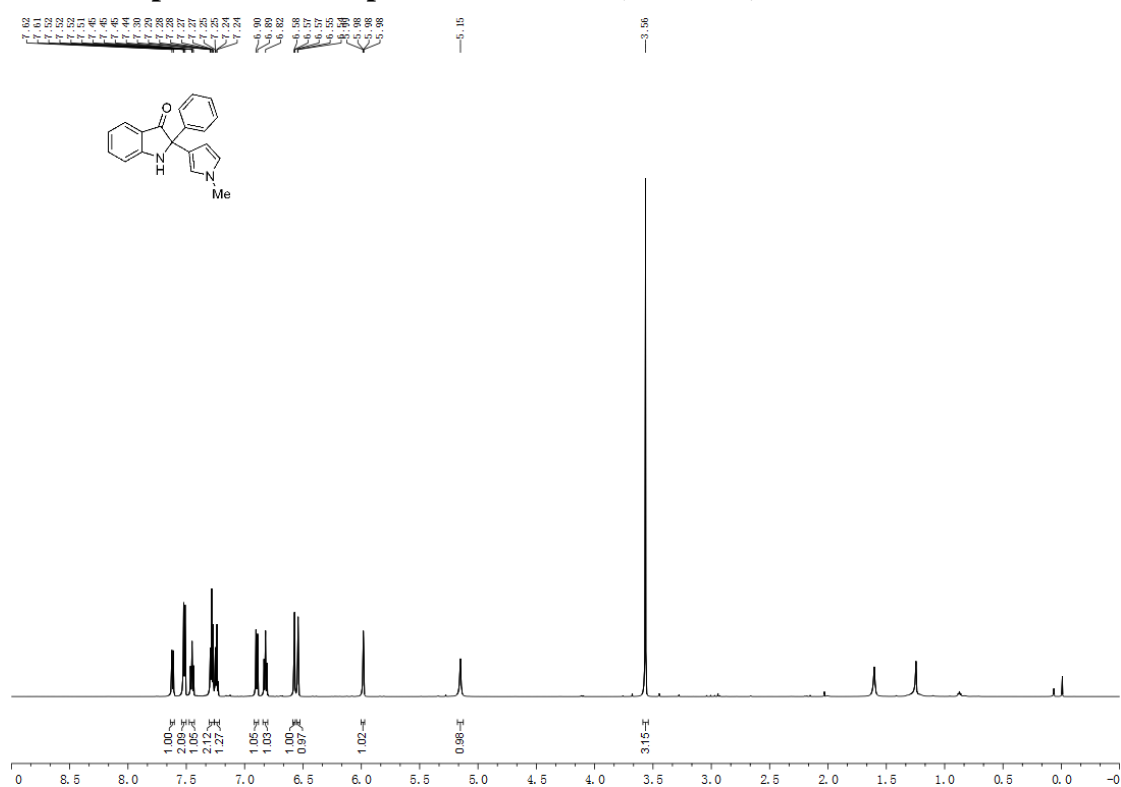

### <sup>13</sup>C NMR spectrum of compound 9 in CDCl<sub>3</sub> (151 MHz)

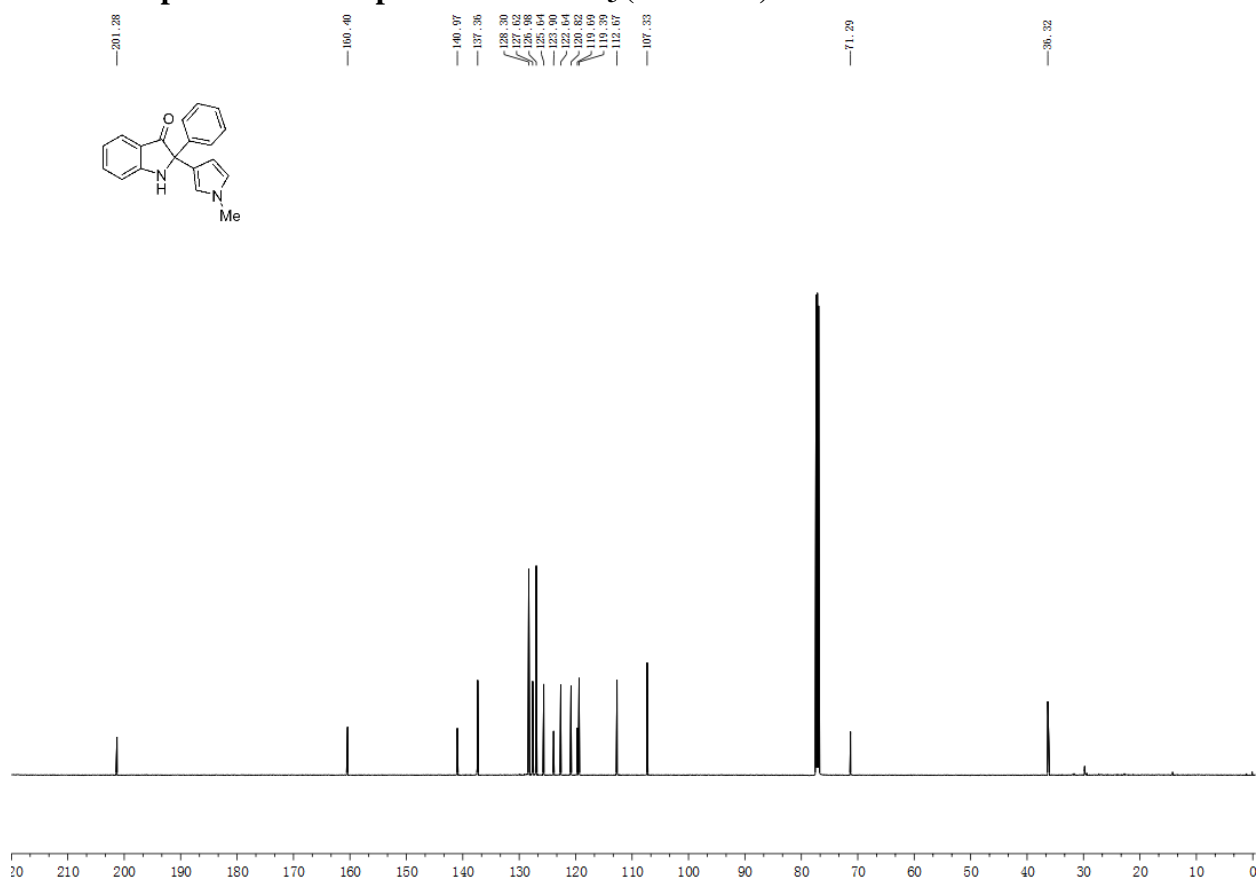

### <sup>1</sup>H NMR spectrum of compound 10 in CDCl<sub>3</sub> (600 MHz)

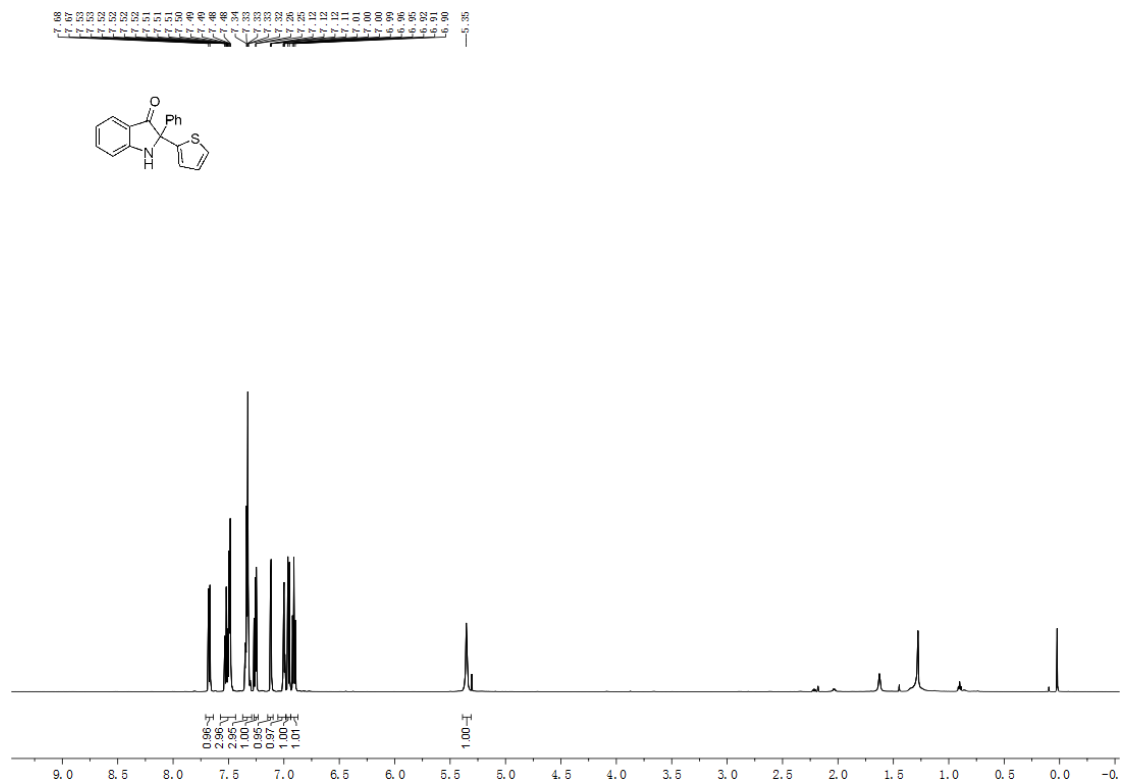

### <sup>13</sup>C NMR spectrum of compound 10 in CDCl<sub>3</sub> (151 MHz)

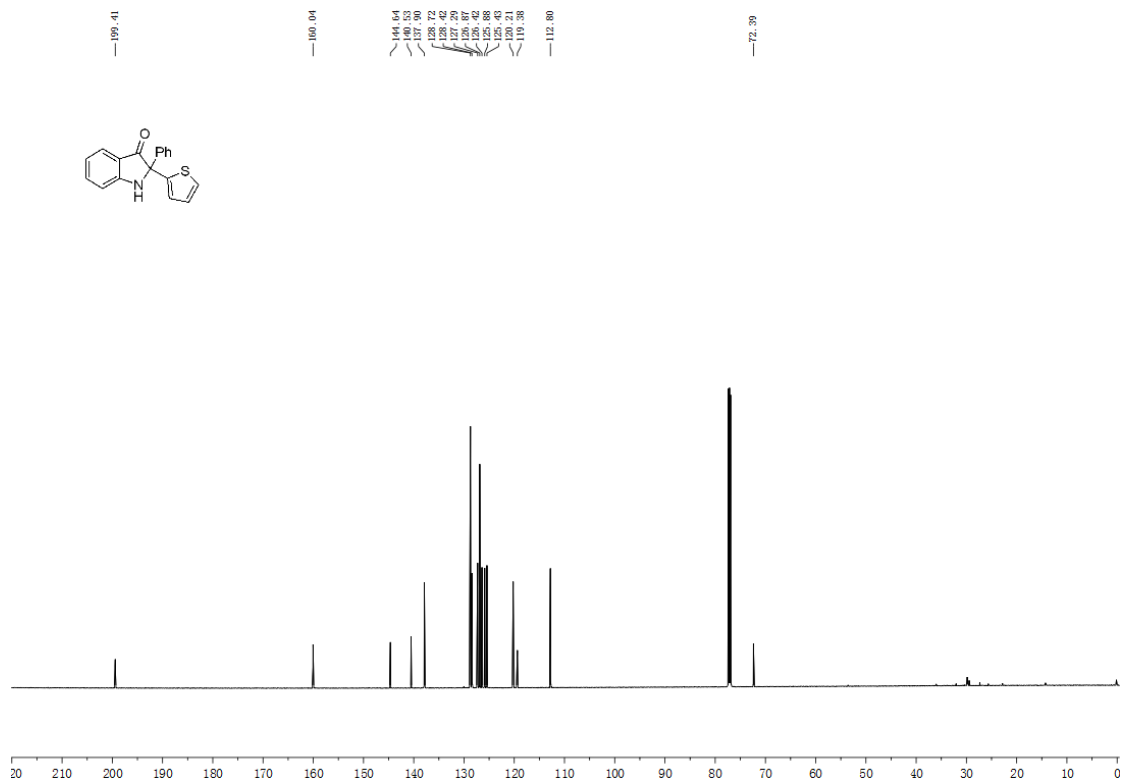



### <sup>1</sup>H NMR spectrum of compound 11 in CDCl<sub>3</sub> (600 MHz)

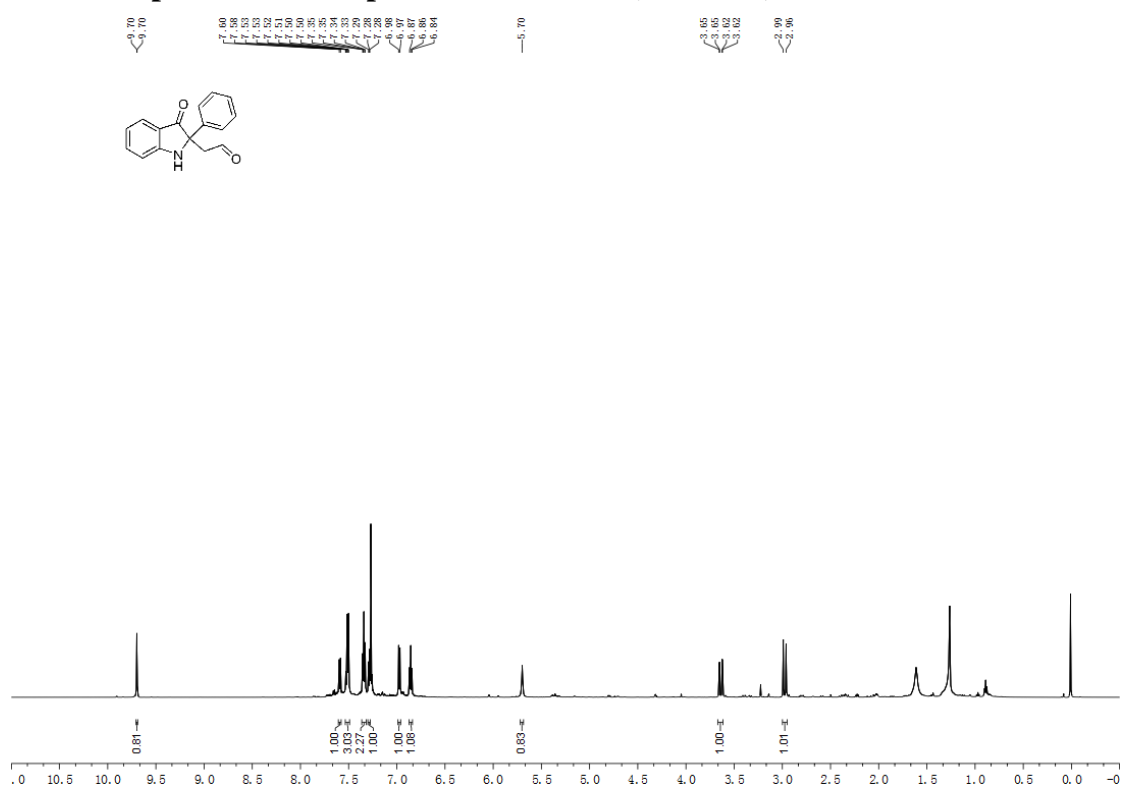

### <sup>13</sup>C NMR spectrum of compound 11 in CDCl<sub>3</sub> (151 MHz)

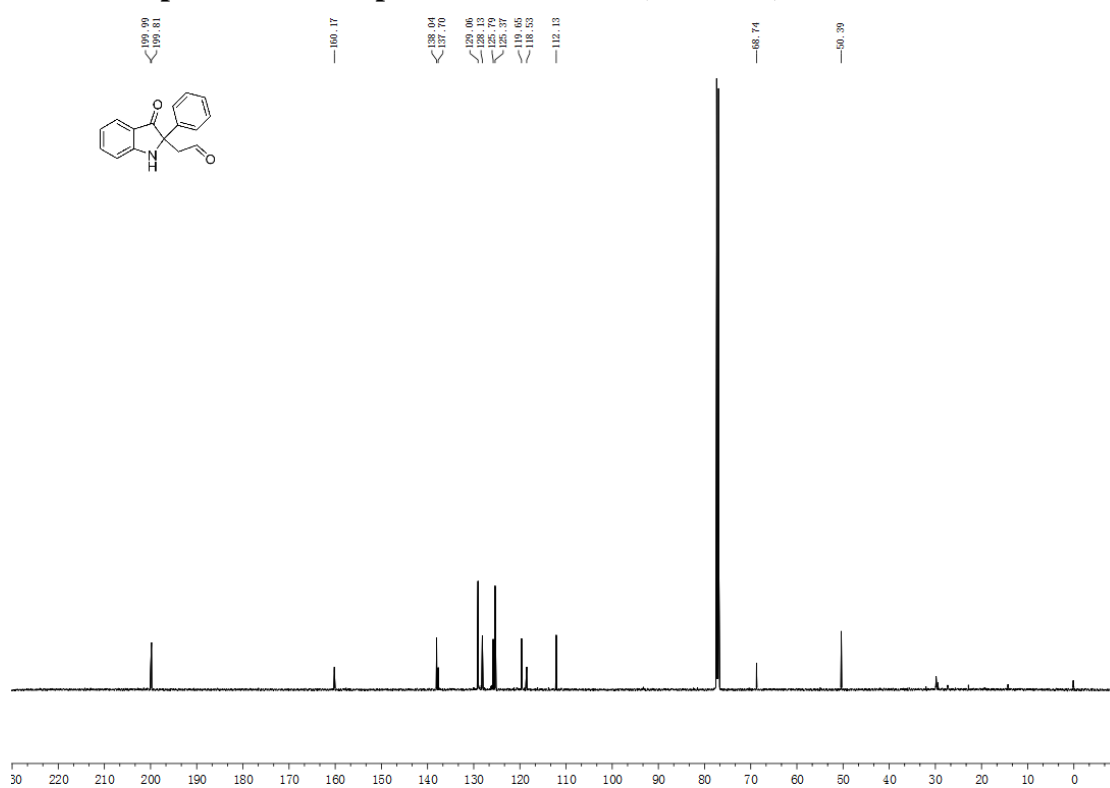

### <sup>1</sup>H NMR spectrum of compound 12 in CDCl<sub>3</sub> (600 MHz)

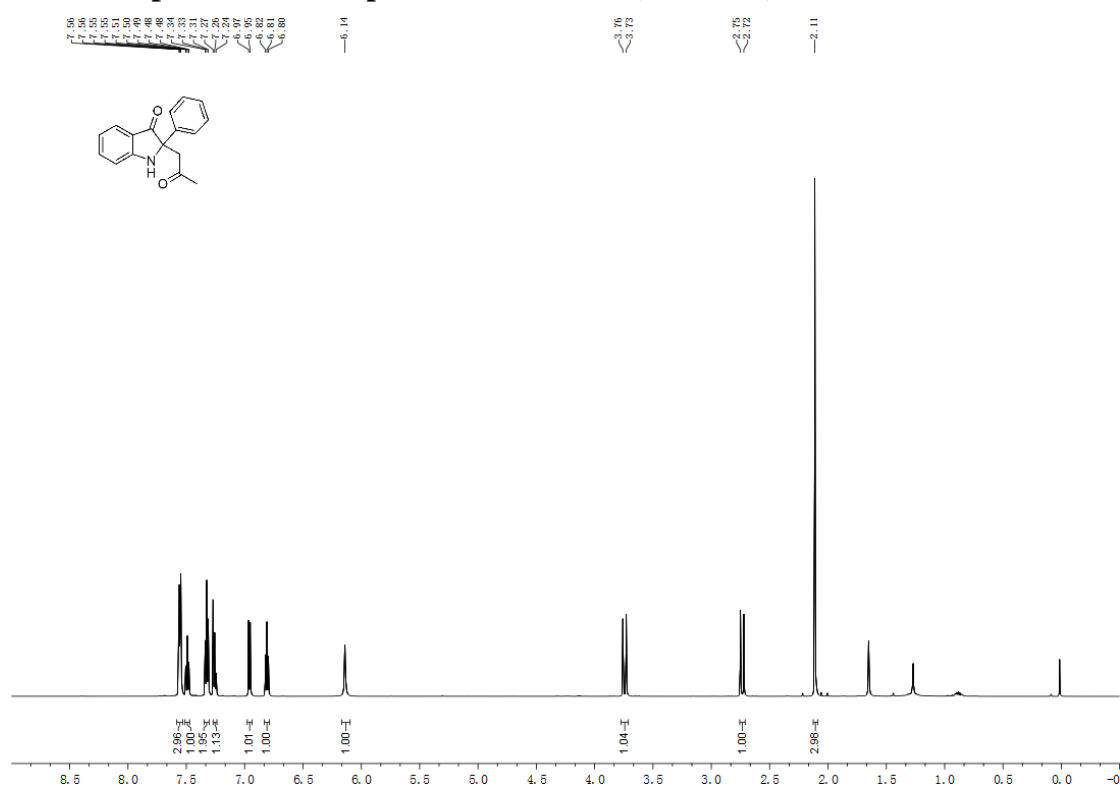

### <sup>13</sup>C NMR spectrum of compound 12 in CDCl<sub>3</sub> (151 MHz)

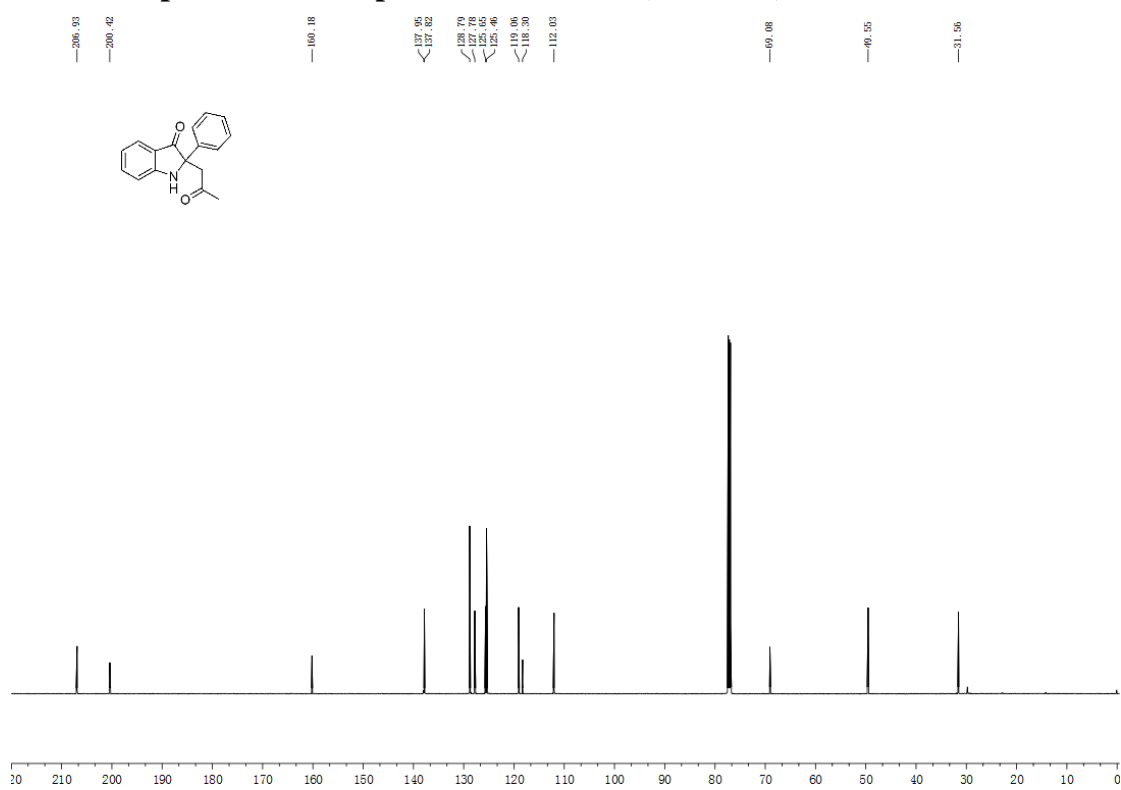

Supplement: s1 [file s1]
